# Supplementary material for: Pd-Catalyzed [3+2] cycloaddition of ketoimines with alkynes via directed sp3 C–H bond activation
Source: Royal Society of Chemistry journal article supplement (doi:10.1039/c4cc04676e), 2014-01-01

## Pd-Catalyzed [3+2] Cycloaddition of Ketoimines with Alkynes via Directed $sp^3$ C-H Bond Activations

Ying Xie,<sup>†</sup> Tengfei Chen,<sup>†</sup> Shaomin Fu,<sup>†</sup> Xing-Shu Li,<sup>‡</sup> Yuanfu Deng,<sup>†</sup> Huanfeng Jiang,<sup>†</sup> and Wei Zeng<sup>\*†</sup>

<sup>†</sup>*School of Chemistry and Chemical Engineering, South China University of Technology, Guangzhou 510641, China*

<sup>‡</sup>*Institute of Drug Synthesis and Pharmaceutical Process, School of Pharmaceutical Sciences, Sun Yat-sen University, Guangzhou 510006, China*

### Supporting Information

#### Table of Contents

|                                                                                                           |    |
|-----------------------------------------------------------------------------------------------------------|----|
| 1. General experimental information .....                                                                 | 2  |
| 1.1 Table 1. Catalyst screening for cycloaddition of ketoimines with alkynes .....                        | 2  |
| 1.2 Table 2. The effect the additives on the cycloaddition of ketoimines with alkynes .....               | 3  |
| 1.3 Table 3. The effect of the solvent on the cycloaddition of ketoimines with alkynes .....              | 3  |
| 1.4 Table 4. The effect of the oxidant on the cycloaddition of ketoimines with alkynes .....              | 4  |
| 1.5 Table 5. The effect of the reaction temperature on the cycloaddition of ketoimines with alkynes ..... | 4  |
| 1.6 Procedures for synthesis of alkyne derivatives ( <b>2g</b> , <b>2h</b> , <b>2i</b> ) .....            | 5  |
| 1.7 General procedure for synthesis of ketoimines <b>1a-1t</b> .....                                      | 6  |
| 1.8 General procedure for synthesis of pyrrole derivatives <b>3a-3za</b> .....                            | 7  |
| 1.9 Procedure for synthesis of 2, 3, 5-triphenyl-1H-pyrrole ( <b>4a</b> ).....                            | 17 |
| 2. Controlled experiments for mechanism studies .....                                                     | 18 |
| 3. Single crystal data about <b>3l</b> .....                                                              | 22 |
| 4. References.....                                                                                        | 28 |
| 5. <sup>1</sup> H NMR and <sup>13</sup> C NMR spectrum for all isolated products.....                     | 29 |

# 1. General experimental information

## 1.1. General methods

All reactions were carried out in flame-dried sealed tubes with magnetic stirring. Unless otherwise noted, all experiments were performed under argon atmosphere. All reagents were purchased from TCI, Acros or Strem. Solvents were treated with 4 Å molecular sieves or sodium and distilled prior to use. Purifications of reaction products were carried out by flash chromatography using Qingdao Haiyang Chemical Co. Ltd silica gel (40-63 mm). Infrared spectra (IR) were recorded on a Bruker TENSOR 27 FTIR spectrophotometer and are reported as wavelength numbers ( $\text{cm}^{-1}$ ). Infrared spectra were recorded by preparing a KBr pellet containing the title compound.  $^1\text{H}$  NMR and  $^{13}\text{C}$  NMR spectra were recorded with tetramethylsilane (TMS) as internal standard at ambient temperature unless otherwise indicated on a Bruker Avance DPX 600 fourier Transform spectrometer operating at 400 MHz for  $^1\text{H}$  NMR and 100 MHz for  $^{13}\text{C}$  NMR. Chemical shifts are reported in parts per million (ppm) and coupling constants are reported as Hertz (Hz). Splitting patterns are designated as singlet (s), broad singlet (bs), doublet (d), triplet (t). Splitting patterns that could not be interpreted or easily visualized are designated as multiple (m). Low resolution mass spectra were recorded using a Waters HPLC/ZQ4000 Mass Spectrometer. High resolution mass spectra (HRMS) were recorded on an IF-TOF spectrometer (Micromass). Gas chromatograph mass spectra were obtained with a SHIMADZU model GCMS-QP5000 spectrometer. Crystal data were collected on a Bruker D8 Advance employing graphite monochromated Mo -  $\text{K}\alpha$  radiation ( $\lambda = 0.71073 \text{ \AA}$ ) at 293 (2) K and operating in the  $\phi$ - $\omega$ scan mode. The structure was solved by direct methods SHELXS-97.

**1.1. Table 1. Catalyst screening for Pd(II)-catalyzed cycloaddition of ketoimine 1a with alkyne 2a<sup>a</sup>**

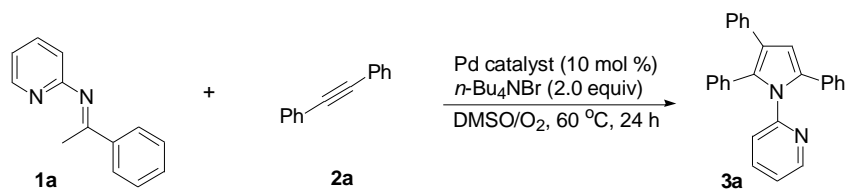

| Entry | Catalyst                                            | Yield (%) <sup>b</sup> |
|-------|-----------------------------------------------------|------------------------|
| 1     | PdCl <sub>2</sub>                                   | N.R.                   |
| 2     | PdCl <sub>2</sub> (CH <sub>3</sub> CN) <sub>2</sub> | Trace                  |
| 3     | PdCl <sub>2</sub> (PPh <sub>3</sub> ) <sub>2</sub>  | 13                     |
| 4     | Pd(TFA) <sub>2</sub>                                | 16                     |

<sup>a</sup>The reactions were carried out using ketoimine **1a** (0.1 mmol) and alkyne **2a** (0.1 mmol) with *n*-Bu<sub>4</sub>NBr (0.2 mmol) in solvent DMSO (1.0 mL) in the presence of Pd catalyst (10 mol %) in a sealed pressure tube at 60 °C for 24 h under O<sub>2</sub>, followed by flash chromatography on SiO<sub>2</sub>. <sup>b</sup> Isolated yield.

**1.2. Table 2. The effect the additives on the Pd(II)-catalyzed cycloaddition of ketoimine 1a with alkyne 2a<sup>a</sup>**

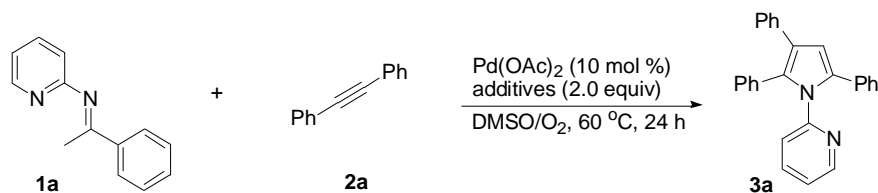

| Entry | Additive                      | Yield (%) <sup>b</sup> |
|-------|-------------------------------|------------------------|
| 1     | <i>n</i> -Bu <sub>4</sub> NI  | 27                     |
| 2     | <i>n</i> -Bu <sub>4</sub> NCl | 48                     |
| 3     | <i>n</i> -Bu <sub>4</sub> NBr | 59                     |

<sup>a</sup>The reactions were carried out using ketoimine **1a** (0.1 mmol) and alkyne **2a** (0.1 mmol) with additives (0.2 mmol) in solvent DMSO (1.0 mL) in the presence of Pd(OAc)<sub>2</sub> (10 mol %) in a sealed pressure tube at 60 °C for 24 h under O<sub>2</sub>, followed by flash chromatography on SiO<sub>2</sub>. <sup>b</sup> Isolated yield.

**1.3. Table 3. The Effect of the solvent on the Pd(II)-catalyzed cycloaddition of ketoimine 1a with alkyne 2a<sup>a</sup>**

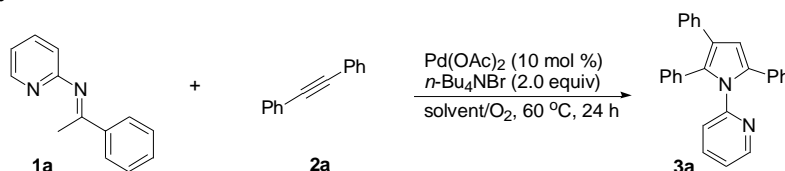

| Entry | Solvent                         | Yield (%) <sup>b</sup> |
|-------|---------------------------------|------------------------|
| 1     | DCE                             | 16                     |
| 2     | CH <sub>3</sub> NO <sub>2</sub> | 21                     |
| 3     | 1,4-Dioxane                     | 24                     |
| 4     | CH <sub>3</sub> CN              | 32                     |
| 5     | Toluene                         | 38                     |
| 6     | DMF                             | 54                     |
| 7     | DMSO                            | 59                     |

<sup>a</sup>The reactions were carried out using ketoimine **1a** (0.1 mmol) and alkyne **2a** (0.1 mmol) with *n*-Bu<sub>4</sub>NBr (0.2 mmol) in solvent (1.0 mL) in the presence of Pd(OAc)<sub>2</sub> (10 mol %) in a sealed pressure tube at 60 °C for 24 h under O<sub>2</sub>, followed by flash chromatography on SiO<sub>2</sub>. <sup>b</sup> Isolated

yield.

#### 1.4. Table 4. The Effect of the oxidant on the cycloaddition of ketoimine **1a** with alkyne **2a**<sup>a</sup>

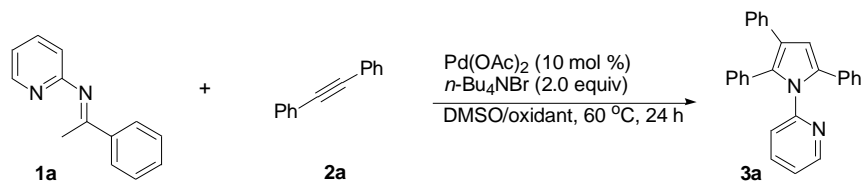

| Entry | Oxidant               | Yield (%) <sup>b</sup> |
|-------|-----------------------|------------------------|
| 1     | Cu(OAc) <sub>2</sub>  | 10                     |
| 2     | AgOAc                 | 13                     |
| 3     | PhI(OAc) <sub>2</sub> | 21                     |
| 4     | Air                   | 38                     |
| 5     | DDQ                   | 56                     |
| 6     | O <sub>2</sub>        | 59                     |

<sup>a</sup>The reactions were carried out using ketoimine **1a** (0.1 mmol), alkyne **2a** (0.1 mmol), oxidants (2.0 equiv.) with *n*-Bu<sub>4</sub>NBr (0.2 mmol) in solvent DMSO (1.0 mL) in the presence of Pd(OAc)<sub>2</sub> (10 mol %) in a sealed pressure tube at 60 °C for 24 h, followed by flash chromatography on SiO<sub>2</sub>. <sup>b</sup> Isolated yield.

#### 1.5. Table 5. The effect of the reaction temperature on the cycloaddition of ketoimine **1a** with alkyne **2a**<sup>a</sup>

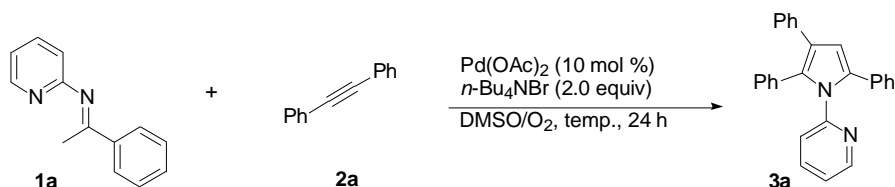

| Entry | Temp. (°C) | Yield (%) <sup>b</sup> |
|-------|------------|------------------------|
| 1     | 60         | 59                     |
| 2     | 80         | 83                     |
| 3     | 100        | 91                     |
| 4     | 120        | 78                     |

<sup>a</sup>The reactions were carried out using ketoimine **1a** (0.1 mmol) and alkyne **2a** (0.1 mmol) with *n*-Bu<sub>4</sub>NBr (0.2 mmol) in solvent DMSO (1.0 mL) in the presence of Pd(OAc)<sub>2</sub> (10 mol %) in a sealed pressure tube at the given temperature for 24 h under O<sub>2</sub>, followed by flash chromatography on SiO<sub>2</sub>. <sup>b</sup> Isolated yield.

## 1.6. Procedures for synthesis of alkyne derivatives (**2g**, **2h**, **2i**)

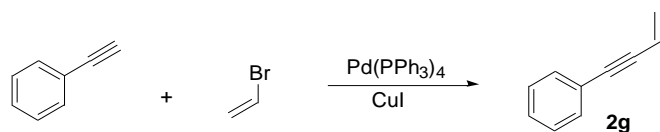

**But-3-en-1-ynyl-benzene (2g)**<sup>[1]</sup>: To a stirred solution of vinyl bromide (1.0 M solution in THF, 15 mL, 15.0 mmol), Pd(PPh<sub>3</sub>)<sub>4</sub> (173 mg, 0.15 mmol), CuI (76 mg, 0.4 mmol), and triethylamine (2.0 mg, 20.0 mmol) was added a solution of phenylacetylene (1.0 g, 10.0 mmol) in THF (5 mL) via a syringe pump for 1h, the reaction mixture was stirred at room temperature for 3 h and then it was filtered through celite. The filtrate was evaporated under reduced pressure and the resulting was subjected to column chromatography on silica gel with petroleum ether to yield 1.0 g of **2g** (78% yield). <sup>1</sup>H NMR (400 MHz, CDCl<sub>3</sub>) δ= 7.44 (d, *J* = 2.3 Hz, 2H), 7.31 (d, *J* = 2.3 Hz, 2H), 6.02 (dd, *J* = 17.5, 11.1 Hz, 1H), 5.73 (d, *J* = 17.5 Hz, 1H), 5.54 (d, *J* = 11.1 Hz, 1H). <sup>13</sup>C NMR (100 MHz, CDCl<sub>3</sub>) δ 131.59, 128.34, 128.32, 126.95, 123.14, 117.21, 89.99, 88.10.

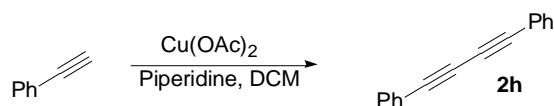

**1, 4-Diphenylbuta-1, 3-diyne (2h)**<sup>[2]</sup>: The mixture of ethynylbenzene (400 mg, 2 mmol), CuCl (2.0 mg, 10 mol %) in DMSO (1 mL) was stirred at room temperature for 16 h. Then the reaction mixture was extracted with CH<sub>2</sub>Cl<sub>2</sub>, the corresponding combined organic layers were dried and concentrated. The resulting was subjected to column chromatography on silica gel with petroleum ether as eluent to yield 190 mg of **2h** (95% yield). <sup>1</sup>H NMR (400 MHz, CDCl<sub>3</sub>) δ= 7.56 (d, *J* = 7.6 Hz, 4H), 7.39 (q, *J* = 6.7 Hz, 6H).

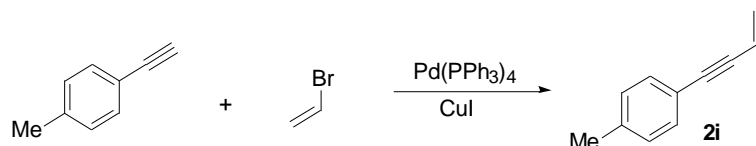

**1-But-3-en-1-ynyl-4-methylbenzene (2i)**<sup>[1]</sup>: The synthetic procedure of **2i** is the same as **2g**. <sup>1</sup>H NMR (400 MHz, CDCl<sub>3</sub>) δ= 7.33 (d, *J* = 8.1 Hz, 2H), 7.08 (dd, *J* = 20.2, 8.2 Hz, 2H), 6.00 (dd, *J* = 17.5, 11.1 Hz, 1H), 5.76 – 5.63 (m, 1H), 5.50 (dd, *J* = 11.1, 2.0 Hz, 1H), 2.33 (s, 3H). <sup>13</sup>C NMR (100 MHz, CDCl<sub>3</sub>) δ 138.44, 131.50, 129.11, 126.47, 120.11, 117.36, 90.22, 87.52, 21.49.

## 1.7. General procedure for synthesis of ketoimines (**1a-1t**)

The mixture of acetophenone derivatives (0.1 mmol, 1.0 equiv.) and substituted 2-aminopyridine (0.1 mmol, 1.0 equiv.) was stirred in toluene (3.0 mL) at 120 °C in the presence of molecular sieve (4Å) (0.40 g) and a catalytic amount of concentrated H<sub>2</sub>SO<sub>4</sub> (10 mol %) for 24 h. The mixture was then filtered and the solvent was removed under reduced pressure to produce crude ketoimines, except that ketoimines **1a**, **1b**, **1c**, **1e**, **1f**, **1h** and **1t** could be purified by flash chromatography to get pure starting material, the other crude ketoimines including **1d**, **1g**, **1i-1s** could be directly used for synthetic purpose without further purification because these ketoimine compounds are easily decomposed on silica gel.<sup>[3]</sup>

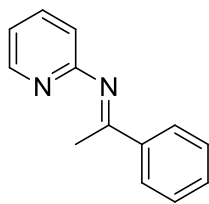

**1a**

**(E)-N-(1-phenylethylidene)pyridin-2-amine (1a)**<sup>[1]</sup>: oil; 15 mg, 77% yield. <sup>1</sup>H NMR (400 MHz, CDCl<sub>3</sub>) δ 8.45 (d, *J* = 4.5 Hz, 1H), 8.00 (d, *J* = 7.7 Hz, 2H), 7.66 (t, *J* = 7.7 Hz, 1H), 7.48 – 7.41 (m, 3H), 7.03 – 6.97 (m, 1H), 6.83 (d, *J* = 8.0 Hz, 1H), 2.27 (s, 3H). <sup>13</sup>C NMR (100 MHz, CDCl<sub>3</sub>) δ 167.69, 163.53, 148.86, 139.04, 137.70, 130.89, 128.33, 127.45, 118.85, 115.19, 18.15. MS (ESI): *m/z* = 196.09 [M<sup>+</sup>]. IR (KBr): 2917, 2850, 1609, 1555, 987, 784 cm<sup>-1</sup>.

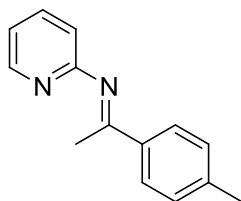

**1b**

**(E)-N-(1-(p-tolyl)ethylidene)pyridin-2-amine (1b)**: white solid; 15 mg, 71% yield; m.p. 81-82.3 °C. <sup>1</sup>H NMR (400 MHz, CDCl<sub>3</sub>) δ 8.45 (d, *J* = 4.0 Hz, 1H), 7.90 (d, *J* = 8.2 Hz, 2H), 7.69 – 7.62 (m, 1H), 7.24 (d, *J* = 8.1 Hz, 2H), 7.04 – 6.97 (m, 1H), 6.83 (d, *J* = 8.0 Hz, 1H), 2.41 (s, 3H), 2.26 (s, 3H). <sup>13</sup>C NMR (100 MHz, CDCl<sub>3</sub>) δ 167.48, 163.67, 148.84, 141.22, 137.65, 136.36, 129.04, 127.46, 118.71, 115.25, 21.41, 18.07. HR-MS (ESI) calcd for [M + 1]<sup>+</sup>: C<sub>14</sub>H<sub>15</sub>N<sub>2</sub>: 211.1230, found: 211.1229; IR (KBr): 2920, 2850, 1639, 1555, 987, 784 cm<sup>-1</sup>.

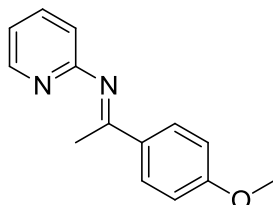

**1c**

**(E)-N-(1-(4-methoxyphenyl)ethylidene)pyridin-2-amine (1c)**: oil; 14 mg, 62% yield. <sup>1</sup>H NMR (400 MHz, CDCl<sub>3</sub>) δ 8.44 (d, *J* = 4.1 Hz, 1H), 7.98 (d, *J* = 8.9 Hz, 2H), 7.66 (td, *J* = 7.8, 1.8 Hz, 1H), 6.99 (dd, *J* = 6.9, 5.4 Hz, 1H), 6.94 (d, *J* = 8.9 Hz, 2H), 6.82 (d, *J* = 8.0 Hz, 1H), 3.86 (s, 3H), 2.24 (s, 3H). <sup>13</sup>C NMR (100 MHz, CDCl<sub>3</sub>) δ 166.66, 163.73, 161.88, 148.83, 137.63, 131.70, 129.21, 118.62, 115.33, 113.57, 55.36, 17.91. HR-MS (ESI) calcd for [M + 1]<sup>+</sup>: C<sub>14</sub>H<sub>15</sub>N<sub>2</sub>O: 227.1179, found: 227.1178; IR (KBr): 3077, 2962, 2837, 1635, 1583, 1462, 1234, 1114, 812 cm<sup>-1</sup>.

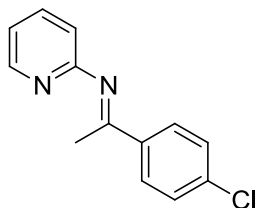

**1e**

**(E)-N-(1-(4-chlorophenyl)ethylidene)pyridin-2-amine (1e):** oil; 18 mg, 78% yield; m.p. 91-93 °C. <sup>1</sup>H NMR (400 MHz, CDCl<sub>3</sub>) δ 8.46 (d, *J* = 4.1 Hz, 1H), 7.88 (d, *J* = 8.6 Hz, 2H), 7.69 (td, *J* = 7.5, 1.4 Hz, 1H), 7.57 (d, *J* = 8.6 Hz, 2H), 7.05 – 7.01 (m, 1H), 6.83 (d, *J* = 8.0 Hz, 1H), 2.25 (s, 3H). <sup>13</sup>C NMR (100 MHz, CDCl<sub>3</sub>) δ 166.62, 163.20, 148.90, 137.90, 137.75, 131.54, 129.06, 125.62, 119.03, 115.15, 17.98. HR-MS (ESI) calcd for [M + 1]<sup>+</sup>: C<sub>13</sub>H<sub>12</sub>ClN<sub>2</sub>: 231.0684, found: 231.0682; IR (KBr): 3081, 3050, 1489, 1277, 1260, 799, 766 cm<sup>-1</sup>.

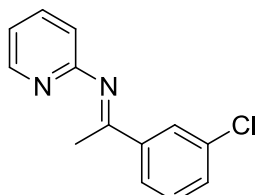

**1f**

**(E)-N-(1-(3-chlorophenyl)ethylidene)pyridin-2-amine (1f):** oil; 15 mg, 65% yield. <sup>1</sup>H NMR (400 MHz, CDCl<sub>3</sub>) δ 8.46 (d, *J* = 4.7 Hz, 1H), 8.02 (s, 1H), 7.87 (d, *J* = 7.7 Hz, 1H), 7.69 (d, *J* = 7.6 Hz, 1H), 7.45 (d, *J* = 7.9 Hz, 1H), 7.38 (t, *J* = 7.8 Hz, 1H), 7.07 – 7.01 (m, 1H), 6.84 (d, *J* = 8.0 Hz, 1H), 2.27 (s, 3H). <sup>13</sup>C NMR (100 MHz, CDCl<sub>3</sub>) δ 166.48, 163.04, 148.89, 140.78, 137.81, 134.57, 130.85, 129.60, 127.64, 125.61, 119.14, 115.16, 18.14. HR-MS (ESI) calcd for [M + 1]<sup>+</sup>: C<sub>13</sub>H<sub>12</sub>ClN<sub>2</sub>: 231.0684, found: 231.0683; IR (KBr): 3067, 3004, 1688, 1586, 1425, 1366, 1235, 815, 789 cm<sup>-1</sup>.

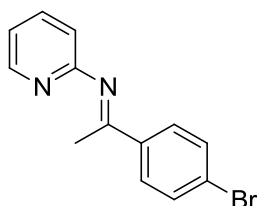

**1h**

**(E)-N-(1-(4-bromophenyl)ethylidene)pyridin-2-amine (1h):** oil; 20 mg, 73% yield. <sup>1</sup>H NMR (400 MHz, CDCl<sub>3</sub>) δ 8.46 (d, *J* = 4.7 Hz, 1H), 7.95 (d, *J* = 8.5 Hz, 2H), 7.69 (t, *J* = 7.2 Hz, 1H), 7.41 (d, *J* = 8.2 Hz, 2H), 7.03 (t, *J* = 5.8 Hz, 1H), 6.83 (d, *J* = 8.0 Hz, 1H), 2.26 (s, 3H). <sup>13</sup>C NMR (100 MHz, CDCl<sub>3</sub>) δ 166.48, 163.22, 148.90, 137.75, 137.45, 137.10, 128.84, 128.56, 119.01, 115.17, 18.01. HR-MS (ESI) calcd for [M]<sup>+</sup>: C<sub>13</sub>H<sub>12</sub>BrN<sub>2</sub>: 275.0178, found: 275.0177; IR (KBr): 1277, 1260, 1053, 1032, 1010, 766, 748 cm<sup>-1</sup>.

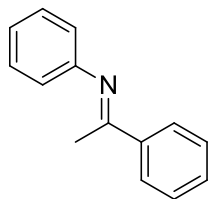

**1t**

**(E)-N-(1-phenylethylidene)aniline (1t)**<sup>[51]</sup>: oil; 16 mg, 82% yield. <sup>1</sup>H NMR (400 MHz, CDCl<sub>3</sub>) δ 7.96 (d, *J* = 7.5 Hz, 2H), 7.43 (d, *J* = 5.6 Hz, 3H), 7.33 (t, *J* = 7.5 Hz, 2H), 7.07 (t, *J* = 7.4 Hz, 1H), 6.79 (d, *J* = 7.8 Hz, 2H), 2.21 (s, 3H). <sup>13</sup>C NMR (100 MHz, CDCl<sub>3</sub>) δ 165.47, 151.77, 139.56, 130.49, 128.99, 128.56, 128.40, 127.22, 123.25, 119.41, 17.39. MS (ESI): *m/z* = 195.06 [M<sup>+</sup>].

### 1.8 General procedure for synthesis of pyrrole derivatives 3a-3za

To the solution of ketoimines **1** (0.1 mmol) in dry DMSO (1.0 mL) were added alkynes **2** (0.1 mmol), Pd(OAc)<sub>2</sub> (2.0 mg, 10 mol %) and Bu<sub>4</sub>NBr (65 mg, 0.2 mmol) under O<sub>2</sub> atmosphere, and then the corresponding reaction mixture was stirred in a sealed tube at 100 °C for 24 h. After the starting materials were disappeared, then cooled down to room temperature and added 1mL of H<sub>2</sub>O, then extracted with CH<sub>2</sub>Cl<sub>2</sub> (3×10 mL). The corresponding combined organic layers were dried over Na<sub>2</sub>SO<sub>4</sub> and concentrated under vacuum, and the resulting crude products were purified by flash chromatography on silical gel using 10% (v/v) ethyl acetate in petroleum ether as eluent to afford the desired pyrroles **3**.

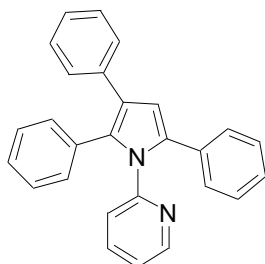

**3a**

**2-(2,3,5-Triphenylpyrrol-1-yl)pyridine (3a):** White solid; 34.0 mg, 91% yield; m.p. 211-213 °C. <sup>1</sup>H NMR (400 MHz, CDCl<sub>3</sub>) δ= 8.37 (d, *J* = 4.7 Hz, 1H), 7.48 (t, *J* = 7.7 Hz, 1H), 7.27 (s, 1H), 7.23 – 7.10 (m, 15H), 6.92 (d, *J* = 7.9 Hz, 1H), 6.70 (s, 1H); <sup>13</sup>C NMR (100 MHz, CDCl<sub>3</sub>) δ 152.22, 148.83, 137.42, 136.10, 135.11, 132.97, 132.61, 132.29, 131.29, 128.34, 128.33, 128.15, 128.09, 127.91, 127.03, 126.47, 125.63, 123.98, 122.53, 110.66. HR-MS (ESI) calcd for [M + 1]<sup>+</sup>: C<sub>27</sub>H<sub>21</sub>N<sub>2</sub>: 373.1699, found: 373.1719; IR (KBr): 3057, 2922, 2373, 1660, 1468, 759, 698 cm<sup>-1</sup>.

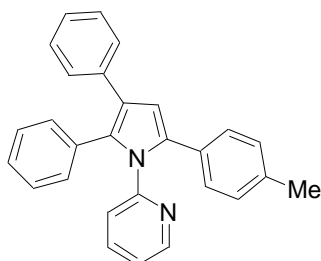

**3b**

**2-(2,3-Diphenyl-5-*p*-tolylpyrrol-1-yl)pyridine (3b):** White solid; 36 mg, 93% yield; m.p. 193-194.5 °C. <sup>1</sup>H NMR (400 MHz, CDCl<sub>3</sub>) δ= 8.30 (dd, *J* = 4.8, 1.1 Hz, 1H), 7.41 (td, *J* = 7.7, 1.9 Hz, 1H), 7.18 (t, *J* = 6.9 Hz, 2H), 7.12 (t, *J* = 7.5 Hz, 2H), 7.04 (dt, *J* = 10.3, 3.6 Hz, 7H), 6.94 (dd, *J* = 18.3, 8.2 Hz, 4H), 6.85 (d, *J* = 7.9 Hz, 1H), 6.58 (s, 1H), 2.20 (s, 3H). HR-MS (ESI) calcd for [M + 1]<sup>+</sup>: C<sub>28</sub>H<sub>23</sub>N<sub>2</sub>: 387.1856, found: 387.1856; IR (KBr): 3483, 3414, 2919, 2850, 2028, 1640, 1103, 617 cm<sup>-1</sup>.

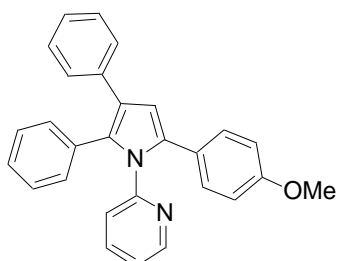



**3c**

**2-[5-(4-Methoxy-phenyl)-2, 3-diphenyl-pyrrol-1-yl]-pyridine (3c):** White solid; 38 mg, 93% yield; m.p. 164.5-166 °C. <sup>1</sup>H NMR (400 MHz, CDCl<sub>3</sub>) δ = 8.38 (dd, *J* = 4.8, 1.2 Hz, 1H), 7.50 (td, *J* = 7.7, 1.9 Hz, 1H), 7.28 – 7.25 (m, 2H), 7.21 (t, *J* = 7.5 Hz, 2H), 7.15 – 7.05 (m, 9H), 6.92 (d, *J* = 7.9 Hz, 1H), 6.74 (d, *J* = 8.8 Hz, 2H), 6.61 (s, 1H), 3.75 (s, 3H). <sup>13</sup>C NMR (100 MHz, CDCl<sub>3</sub>) δ 158.36, 152.28, 148.80, 137.37, 136.19, 134.95, 132.68, 131.67, 131.22, 129.67, 128.31, 128.11, 127.87, 126.89, 125.61, 125.54, 124.02, 123.79, 122.44, 113.57, 109.90, 55.18. HR-MS (ESI) calcd for [M + 1]<sup>+</sup>: C<sub>28</sub>H<sub>23</sub>N<sub>2</sub>O: 403.1805, found: 403.1808; IR (KBr): 3743, 3056, 2920, 2844, 1583, 1469, 1246, 765, 698 cm<sup>-1</sup>.

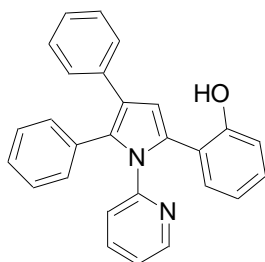**3d**

**2-(4, 5-Diphenyl-1-pyridin-2-yl-1H-pyrrol-2-yl)-phenol (3d):** White solid; 17 mg, 44% yield; m.p. 201-213 °C. <sup>1</sup>H NMR (400 MHz, CDCl<sub>3</sub>) δ = 9.54 (s, 1H), 8.39 (d, *J* = 4.5 Hz, 1H), 7.44 (td, *J* = 7.8, 1.6 Hz, 1H), 7.28 – 7.01 (m, 14H), 6.85 (t, *J* = 7.4 Hz, 1H), 6.71 (d, *J* = 8.0 Hz, 1H), 6.51 (s, 1H). <sup>13</sup>C NMR (100 MHz, CDCl<sub>3</sub>) δ 155.32, 151.81, 147.35, 138.25, 135.75, 132.56, 132.24, 132.00, 131.52, 130.83, 129.97, 128.37, 128.21, 128.18, 127.12, 125.84, 124.85, 123.59, 122.71, 122.44, 120.36, 118.85, 113.13. HR-MS (ESI) calcd for [M + 1]<sup>+</sup>: C<sub>27</sub>H<sub>21</sub>N<sub>2</sub>O: 389.1648, found: 389.1644; IR (KBr): 3667, 3644, 2986, 2918, 2849, 1767, 1594, 1258, 698 cm<sup>-1</sup>.

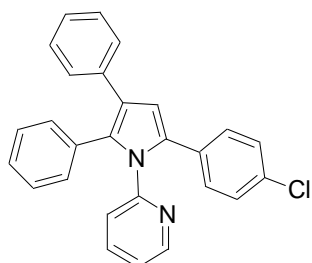**3e**

**2-[5-(4-Chloro-phenyl)-2,3-diphenyl-2,3-diphenyl-pyrrol-1-yl]-pyridine (3e):** White solid; 32 mg, 78% yield; m.p. 206.8-208 °C. <sup>1</sup>H NMR (400 MHz, CDCl<sub>3</sub>) δ 8.40 (dd, *J* = 4.8, 1.1 Hz, 1H), 7.52 (td, *J* = 7.7, 1.9 Hz, 1H), 7.31 (d, *J* = 8.5 Hz, 2H), 7.26 – 7.07 (m, 11H), 7.01 (d, *J* = 8.5 Hz, 2H), 6.91 (d, *J* = 7.9 Hz, 1H), 6.69 (s, 1H). <sup>13</sup>C NMR (100 MHz, CDCl<sub>3</sub>) δ 151.96, 148.93, 137.57, 135.82, 133.87, 132.72, 132.34, 131.92, 131.23, 129.71, 128.27, 128.16, 127.94, 127.17, 125.73, 124.13, 123.89, 122.71, 120.51, 110.93. HR-MS (ESI) calcd for [M + 1]<sup>+</sup>: C<sub>27</sub>H<sub>20</sub>ClN<sub>2</sub>: 407.1310, found: 407.1310; IR (KBr): 3743, 3056, 2920, 2844, 1267, 756 cm<sup>-1</sup>.

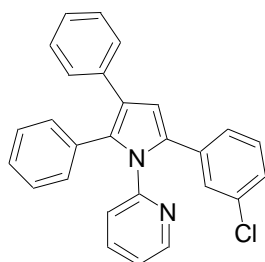

**3f**

**2-[5-(3-Chloro-phenyl)-2, 3-diphenyl-pyrrol-1-yl]-pyridine (3f):** White solid; 24 mg, 59% yield; m.p. 199.3-210.9 °C. <sup>1</sup>H NMR (400 MHz, CDCl<sub>3</sub>) δ 8.41 (dd, *J* = 4.7, 1.2 Hz, 1H), 7.53 (td, *J* = 7.7, 1.8 Hz, 1H), 7.28 – 7.06 (m, 14H), 7.00 – 6.95 (m, 1H), 6.92 (d, *J* = 7.9 Hz, 1H), 6.72 (s, 1H). <sup>13</sup>C NMR (100 MHz, CDCl<sub>3</sub>) δ 151.89, 148.92, 137.58, 135.78, 134.69, 133.95, 133.60, 132.88, 132.30, 131.25, 129.22, 128.26, 128.19, 128.17, 127.96, 127.22, 126.41, 126.22, 125.75, 124.13, 123.89, 122.76, 111.25. HR-MS (ESI) calcd for [M + 1]<sup>+</sup>: C<sub>27</sub>H<sub>20</sub>ClN<sub>2</sub>: 407.1310, found: 407.1314; IR (KBr): 3667, 3644, 2986, 2849, 2354, 2315, 1767, 1594, 1258, 764 cm<sup>-1</sup>.

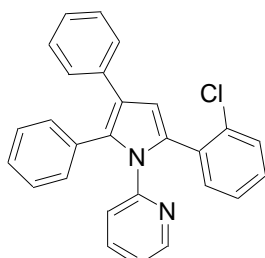

**3g**

**2-[5-(2-Chloro-phenyl)-2, 3-diphenyl-pyrrol-1-yl]-pyridine (3g):** White solid; 22 mg, 54% yield; m.p. 188-189.6 °C. <sup>1</sup>H NMR (400 MHz, CDCl<sub>3</sub>) δ= 8.22 (dd, *J* = 4.9, 1.1 Hz, 1H), 7.41 (td, *J* = 7.8, 1.9 Hz, 1H), 7.31 – 7.25 (m, 4H), 7.21 (t, *J* = 7.5 Hz, 2H), 7.17 – 7.09 (m, 8H), 7.04 – 6.96 (m, 1H), 6.84 (d, *J* = 8.0 Hz, 1H), 6.68 (s, 1H). <sup>13</sup>C NMR (100 MHz, CDCl<sub>3</sub>) δ 151.82, 148.39, 136.98, 136.08, 134.25, 133.00, 132.63, 132.48, 131.49, 131.15, 131.10, 129.39, 128.67, 128.41, 128.12, 127.99, 127.00, 126.15, 125.60, 123.63, 123.26, 121.94, 112.49. HR-MS (ESI) calcd for [M + 1]<sup>+</sup>: C<sub>27</sub>H<sub>20</sub>ClN<sub>2</sub>: 407.1310, found: 407.1310; IR (KBr): 3479, 3417, 2026, 1640, 1103, 764, 618 cm<sup>-1</sup>.

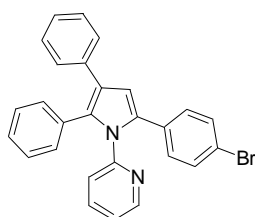

**3h**

**2-[5-(2-Bromo-phenyl)-2, 3-diphenyl-pyrrol-1-yl]-pyridine (3h):** White solid; 38 mg, 84% yield; m.p. 187.2-189 °C. <sup>1</sup>H NMR (400 MHz, CDCl<sub>3</sub>) δ= 8.39 (dd, *J* = 4.8, 1.2 Hz, 1H), 7.51 (td, *J* = 7.7, 1.9 Hz, 1H), 7.26 – 7.05 (m, 15H), 6.91 (d, *J* = 7.9 Hz, 1H), 6.68 (s, 1H). <sup>13</sup>C NMR (100 MHz, CDCl<sub>3</sub>) δ 151.98, 148.93, 137.56, 135.85, 133.88, 132.65, 132.36, 131.48, 131.24, 129.43, 128.30, 128.29, 128.17, 127.95, 127.17, 125.73, 124.10, 123.90, 122.70, 110.91. HR-MS (ESI)

calcd for  $[M + 1]^+$ :  $C_{27}H_{20}BrN_2$ : 451.0804, found: 451.0805; IR (KBr): 3479, 3417, 1473, 1267, 756  $cm^{-1}$ .

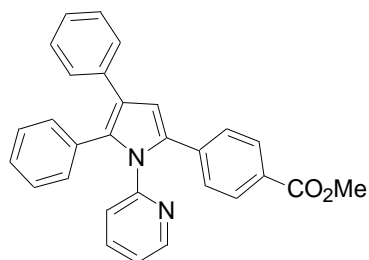

**3i**

**4-(4, 5-Diphenyl-1-pyridin-2-yl-1H-pyrrol-2-yl)-benzoic acid methyl ester (3i):** White solid; 30 mg, 70% yield; m.p. 195.2-197.5 °C.  $^1H$  NMR (400 MHz,  $CDCl_3$ )  $\delta$ = 8.39 (dd,  $J$  = 4.9, 1.2 Hz, 1H), 7.85 (d,  $J$  = 8.4 Hz, 2H), 7.52 (td,  $J$  = 7.7, 1.9 Hz, 1H), 7.29 – 7.08 (m, 13H), 6.93 (d,  $J$  = 7.9 Hz, 1H), 6.81 (s, 1H), 3.87 (s, 3H).  $^{13}C$  NMR (100 MHz,  $CDCl_3$ )  $\delta$  166.97, 151.94, 148.98, 137.64, 137.37, 135.68, 133.94, 133.53, 132.19, 131.26, 129.46, 128.27, 128.19, 127.98, 127.62, 127.32, 125.82, 124.41, 123.84, 122.82, 111.92, 52.01. HR-MS (ESI) calcd for  $[M + 1]^+$ :  $C_{29}H_{23}N_2O_2$ : 431.1754, found: 431.1750; IR (KBr): 3479, 2921, 2850, 1717, 1603, 1469, 1276, 1183, 1110, 811, 759  $cm^{-1}$ .

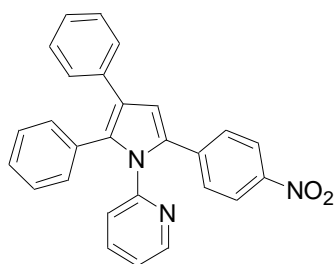

**3j**

**2-[5-(4-Nitro-phenyl)-2, 3-diphenyl-pyrrol-1-yl]-pyridine (3j):** White solid; 28 mg, 67% yield; m.p. 187.5-189 °C.  $^1H$  NMR (400 MHz,  $CDCl_3$ )  $\delta$ = 8.43 (dd,  $J$  = 4.8, 1.1 Hz, 1H), 8.04 (d,  $J$  = 8.9 Hz, 2H), 7.56 (td,  $J$  = 7.7, 1.8 Hz, 1H), 7.26 – 7.08 (m, 13H), 6.94 (d,  $J$  = 7.9 Hz, 1H), 6.88 (s, 1H).  $^{13}C$  NMR (100 MHz,  $CDCl_3$ )  $\delta$  151.66, 149.15, 145.72, 139.32, 137.89, 135.28, 134.70, 132.76, 131.80, 131.22, 128.27, 128.25, 128.08, 127.84, 127.63, 126.06, 124.85, 123.76, 123.60, 123.15, 113.11. HR-MS (ESI) calcd for  $[M + 1]^+$ :  $C_{27}H_{20}N_3O_2$ : 418.1550, found: 418.1550; IR (KBr): 1632, 1514, 1335, 1267, 756  $cm^{-1}$ .

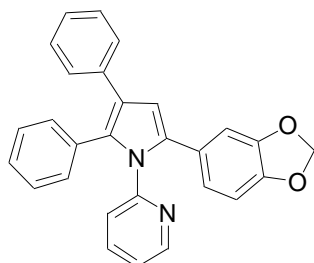

**3k**

**2-(5-Benzo [1, 3] dioxol-5-yl-2, 3-diphenyl-pyrrol-1-yl)-pyridine (3k):** White solid; 38 mg, 91% yield; m.p. 181-183 °C.  $^1H$  NMR (400 MHz,  $CDCl_3$ )  $\delta$ = 8.39 (dd,  $J$  = 4.9, 1.3 Hz, 1H), 7.51 (td,  $J$  = 7.7, 1.9 Hz, 1H), 7.28 – 7.23 (m, 2H), 7.20 (dd,  $J$  = 10.1, 4.8 Hz, 2H), 7.16 – 7.05 (m, 7H),

6.92 (d,  $J = 7.9$  Hz, 1H), 6.65 (s, 3H), 6.60 (s, 1H), 5.94 – 5.84 (m, 2H).  $^{13}\text{C}$  NMR (100 MHz,  $\text{CDCl}_3$ )  $\delta$  152.16, 148.84, 147.32, 146.39, 137.43, 136.07, 134.85, 132.59, 131.88, 131.24, 128.29, 128.13, 127.88, 127.04, 126.97, 125.59, 123.98, 123.77, 122.55, 122.24, 110.24, 109.06, 108.07, 100.93. HR-MS (ESI) calcd for  $[\text{M} + 1]^+$ :  $\text{C}_{28}\text{H}_{21}\text{N}_2\text{O}_2$ : 417.1598, found: 417.1597; IR (KBr): 3450, 2922, 2854, 1637, 1474, 1269, 1038, 755, 697  $\text{cm}^{-1}$ .

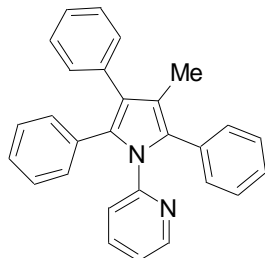

**3l**

**2-(3-Methyl-2, 4, 5-triphenyl-pyrrol-1-yl)-pyridine (3l):** White solid; 20 mg, 52% yield; m.p. 124-127 °C.  $^1\text{H}$  NMR (400 MHz,  $\text{CDCl}_3$ )  $\delta$  8.30 (dd,  $J = 4.9, 1.2$  Hz, 1H), 7.43 (tt,  $J = 5.3, 2.6$  Hz, 1H), 7.27 – 7.14 (m, 10H), 7.04 – 6.97 (m, 6H), 6.88 (d,  $J = 7.9$  Hz, 1H), 2.14 (s, 3H).  $^{13}\text{C}$  NMR (100 MHz,  $\text{CDCl}_3$ )  $\delta$  152.45, 148.58, 137.11, 136.03, 132.85, 132.44, 131.94, 131.64, 130.91, 130.70, 130.52, 127.87, 127.75, 127.50, 126.43, 126.26, 125.76, 124.91, 123.82, 121.98, 117.41, 10.82. HR-MS (ESI) calcd for  $[\text{M} + 1]^+$ :  $\text{C}_{28}\text{H}_{23}\text{N}_2$ : 387.1856, found: 387.1866; IR (KBr): 3479, 3416, 2026, 1640, 1617, 1133, 1104, 767, 618  $\text{cm}^{-1}$ .

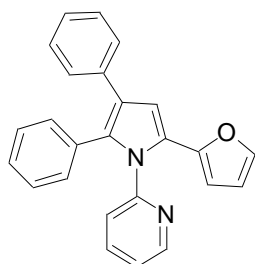

**3m**

**2-(5-Furan-2-yl-2, 3-diphenyl-pyrrol-1-yl)-pyridine (3m):** White solid; 17 mg, 47% yield; m.p. 150.5-151.8 °C.  $^1\text{H}$  NMR (400 MHz,  $\text{CDCl}_3$ )  $\delta$  8.54 – 8.50 (m, 1H), 7.58 (tt,  $J = 5.4, 2.7$  Hz, 1H), 7.29 – 7.08 (m, 12H), 7.03 (d,  $J = 7.9$  Hz, 1H), 6.87 (s, 1H), 6.23 (dd,  $J = 3.4, 1.8$  Hz, 1H), 5.57 – 5.55 (m, 1H).  $^{13}\text{C}$  NMR (100 MHz,  $\text{CDCl}_3$ )  $\delta$  152.09, 148.91, 147.15, 141.13, 137.76, 135.83, 132.42, 132.06, 131.11, 128.29, 128.15, 127.97, 127.15, 126.21, 125.72, 124.01, 123.98, 123.29, 110.90, 109.66, 105.65. HR-MS (ESI) calcd for  $[\text{M} + 1]^+$ :  $\text{C}_{25}\text{H}_{19}\text{N}_2\text{O}$ : 363.1492, found: 363.1498; IR (KBr): 3057, 2990, 2918, 2849, 1584, 1270, 758  $\text{cm}^{-1}$ .

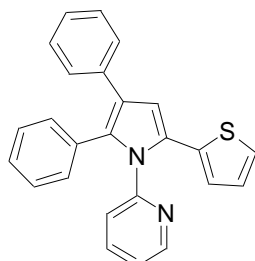

**3n**

**2-(2, 3-Diphenyl-5-thiophen-2-yl-pyrrol-1-yl)-pyridine (3n):** White solid; 21 mg, 56% yield; m.p. 171-173.5 °C. <sup>1</sup>H NMR (400 MHz, CDCl<sub>3</sub>) δ= 8.51 – 8.47 (m, 1H), 7.57 (td, *J* = 7.7, 1.9 Hz, 1H), 7.27 (t, *J* = 1.8 Hz, 1H), 7.24 – 7.18 (m, 3H), 7.16 – 7.09 (m, 8H), 7.03 (d, *J* = 7.9 Hz, 1H), 6.84 (dd, *J* = 5.1, 3.6 Hz, 1H), 6.75 (s, 1H), 6.61 (dd, *J* = 3.6, 1.1 Hz, 1H). <sup>13</sup>C NMR (100 MHz, CDCl<sub>3</sub>) δ 151.83, 148.95, 137.67, 135.79, 134.72, 132.54, 132.20, 131.09, 128.52, 128.30, 128.16, 127.94, 127.10, 126.98, 125.72, 125.04, 124.42, 123.92, 123.25, 110.96. HR-MS (ESI) calcd for [M + 1]<sup>+</sup>: C<sub>25</sub>H<sub>19</sub>N<sub>2</sub>S: 379.1264, found: 379.1264; IR (KBr): 3796, 3667, 3644, 2917, 2847, 2353, 1573, 1464, 1260, 748 cm<sup>-1</sup>.

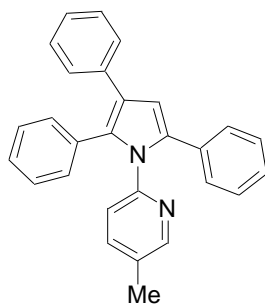

**3o**

**5-Methyl-2-(2, 3, 5-triphenyl-pyrrol-1-yl)-pyridine (3o):** White solid; 32 mg, 82% yield; m.p. 218-219.7 °C. <sup>1</sup>H NMR (400 MHz, CDCl<sub>3</sub>) δ 8.19 (s, 1H), 7.29 (dd, *J* = 8.1, 1.8 Hz, 1H), 7.26 (d, *J* = 7.3 Hz, 2H), 7.22 – 7.18 (m, 3H), 7.17 – 7.09 (m, 10H), 6.83 (d, *J* = 8.0 Hz, 1H), 6.68 (s, 1H), 2.26 (s, 3H). <sup>13</sup>C NMR (100 MHz, CDCl<sub>3</sub>) δ 149.82, 149.03, 138.02, 136.19, 135.11, 133.05, 132.67, 132.33, 132.25, 131.29, 128.31, 128.12, 128.05, 127.87, 126.94, 126.37, 125.55, 123.86, 123.30, 110.49, 18.05. HR-MS (ESI) calcd for [M + 1]<sup>+</sup>: C<sub>28</sub>H<sub>23</sub>N<sub>2</sub>: 387.1856, found: 387.1851; IR (KBr): 2919, 2848, 1771, 1596, 1477, 1277, 1025, 911, 751 cm<sup>-1</sup>.

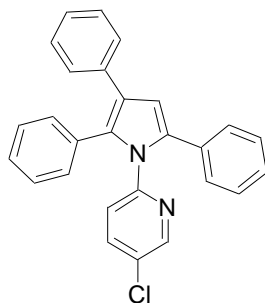

**3p**

**5-Chloro-2-(2, 3, 5-triphenyl-pyrrol-1-yl)-pyridine (3p):** White solid; 25 mg, 61% yield; m.p. 215.3-217 °C. <sup>1</sup>H NMR (400 MHz, CDCl<sub>3</sub>) δ= 8.32 (d, *J* = 2.5 Hz, 1H), 7.46 (dd, *J* = 8.4, 2.5 Hz, 1H), 7.26 – 7.13 (m, 13H), 7.10 (dd, *J* = 7.1, 2.0 Hz, 2H), 6.85 (d, *J* = 8.4 Hz, 1H), 6.69 (s, 1H). <sup>13</sup>C NMR (100 MHz, CDCl<sub>3</sub>) δ 150.41, 147.58, 137.17, 135.80, 135.17, 132.70, 132.31, 132.23, 131.26, 130.67, 128.39, 128.27, 128.22, 128.16, 128.07, 127.26, 126.69, 125.75, 124.47, 124.27, 110.98. HR-MS (ESI) calcd for [M + 1]<sup>+</sup>: C<sub>27</sub>H<sub>20</sub>ClN<sub>2</sub>: 407.1310, found: 407.1311; IR (KBr): 3796, 2917, 2847, 2353, 1770, 1464, 1260, 748 cm<sup>-1</sup>.

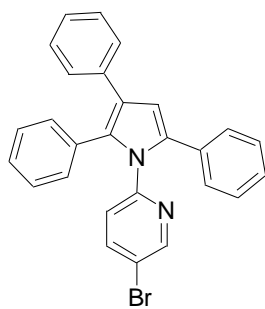

**3q**

**5-Bromo-2-(2, 3, 5-triphenyl-pyrrol-1-yl)-pyridine (3q):** White solid; 28 mg, 62% yield; m.p. 223-224.5 °C. <sup>1</sup>H NMR (400 MHz, CDCl<sub>3</sub>) δ 8.41 (s, 1H), 7.60 (d, *J* = 8.3 Hz, 1H), 7.25 – 7.08 (m, 15H), 6.79 (d, *J* = 8.4 Hz, 1H), 6.69 (s, 1H). <sup>13</sup>C NMR (100 MHz, CDCl<sub>3</sub>) δ 150.84, 149.85, 140.03, 135.80, 135.13, 132.70, 132.30, 132.18, 131.27, 128.40, 128.28, 128.24, 128.18, 128.09, 127.29, 126.71, 125.76, 124.97, 124.33, 119.17, 111.06. HR-MS (ESI) calcd for [M + 1]<sup>+</sup>: C<sub>27</sub>H<sub>20</sub>BrN<sub>2</sub>: 451.0804, found: 451.0804; IR (KBr): 3666, 3307, 2916, 2847, 1568, 1462, 1259, 1067, 747 cm<sup>-1</sup>.

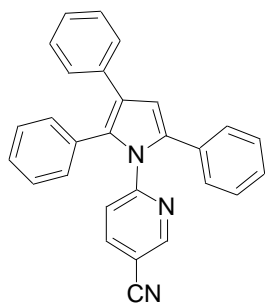

**3r**

**6-(2, 3, 5-Triphenyl-pyrrol-1-yl)-nicotinonitrile (3r):** White solid; 16 mg, 40% yield; m.p. 209-211 °C. <sup>1</sup>H NMR (400 MHz, CDCl<sub>3</sub>) δ 8.59 (d, *J* = 1.8 Hz, 1H), 7.71 (dd, *J* = 8.3, 2.1 Hz, 1H), 7.24 – 7.15 (m, 11H), 7.12 – 7.06 (m, 4H), 6.95 (d, *J* = 8.3 Hz, 1H), 6.71 (s, 1H). <sup>13</sup>C NMR (100 MHz, CDCl<sub>3</sub>) δ 154.75, 151.78, 140.28, 135.31, 135.12, 132.40, 132.00, 131.95, 131.23, 128.49, 128.36, 128.26, 128.23, 127.63, 127.06, 126.03, 125.03, 123.47, 116.13, 112.04, 108.02. HR-MS (ESI) calcd for [M + 1]<sup>+</sup>: C<sub>28</sub>H<sub>20</sub>N<sub>3</sub>: 398.1652, found: 398.1646; IR (KBr): 3558, 3480, 2919, 2849, 2233, 2026, 1641, 1103, 618 cm<sup>-1</sup>.

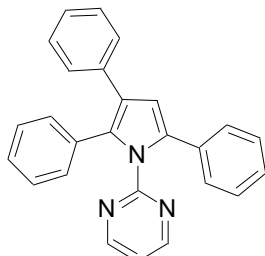

**3s**

**2-(2, 3, 5-Triphenyl-pyrrol-1-yl)-pyrimidine (3s):** White solid; 18 mg, 48% yield; m.p. 186.3-188 °C. <sup>1</sup>H NMR (400 MHz, CDCl<sub>3</sub>) δ= 8.55 (d, *J* = 4.8 Hz, 2H), 7.30 – 7.26 (m, 2H), 7.24 – 7.12 (m, 13H), 7.09 (t, *J* = 4.8 Hz, 1H), 6.69 (s, 1H). <sup>13</sup>C NMR (100 MHz, CDCl<sub>3</sub>) δ 158.55, 158.16, 135.87, 135.36, 133.04, 132.56, 132.43, 130.94, 128.40, 128.18, 128.12, 127.98, 127.90,

127.08, 126.59, 125.76, 124.44, 119.23, 111.38. HR-MS (ESI) calcd for  $[M + 1]^+$ :  $C_{26}H_{20}N_3$ : 374.1652, found: 374.1652; IR (KBr): 2958, 2920, 1766, 1563, 1446, 1261, 762, 698  $cm^{-1}$ .

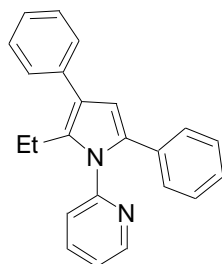

**3t**

**2-(2-Ethyl-3, 5-diphenyl-pyrrol-1-yl)-pyridine (3t):** White solid; 26 mg, 80% yield; m.p. 123-125 °C.  $^1H$  NMR (400 MHz,  $CDCl_3$ )  $\delta$  = 8.33 (ddd,  $J$  = 4.9, 1.9, 0.7 Hz, 1H), 7.48 (td,  $J$  = 7.8, 1.9 Hz, 1H), 7.20 – 7.06 (m, 11H), 6.88 (d,  $J$  = 8.0 Hz, 1H), 6.44 (s, 1H), 2.55 (q,  $J$  = 7.5 Hz, 2H), 1.23 (t,  $J$  = 7.5 Hz, 3H).  $^{13}C$  NMR (100 MHz,  $CDCl_3$ )  $\delta$  152.43, 148.77, 137.29, 134.33, 133.37, 132.82, 132.03, 130.48, 128.20, 127.95, 127.70, 126.44, 126.05, 125.49, 123.58, 122.02, 19.41, 15.68. HR-MS (ESI) calcd for  $[M + 1]^+$ :  $C_{23}H_{21}N_2$ : 325.1699, found: 325.1699; IR (KBr): 3481, 3416, 2963, 2926, 1640, 1468, 1103, 750, 698, 617  $cm^{-1}$ .

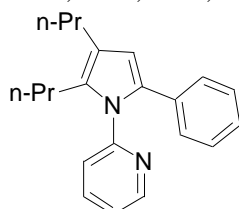

**3u**

**2-(5-Phenyl-2, 3-dipropyl-pyrrol-1-yl)-pyridine (3u):** oil; 20 mg, 66% yield.  $^1H$  NMR (400 MHz,  $CDCl_3$ )  $\delta$  = 8.58 (dd,  $J$  = 4.8, 1.2 Hz, 1H), 7.57 (td,  $J$  = 7.7, 1.9 Hz, 1H), 7.21 (dd,  $J$  = 7.0, 5.3 Hz, 1H), 7.11 (t,  $J$  = 7.2 Hz, 2H), 7.06 – 7.02 (m, 2H), 7.02 – 6.96 (m, 2H), 6.90 (d,  $J$  = 7.9 Hz, 1H), 6.26 (s, 1H), 2.61 (t,  $J$  = 16.5, 8.9 Hz, 2H), 2.49 – 2.40 (t, 2H), 1.65 (q,  $J$  = 15.1, 7.5 Hz, 2H), 1.29 – 1.20 (m, 2H), 1.00 (t,  $J$  = 7.3 Hz, 3H), 0.74 (t,  $J$  = 7.3 Hz, 3H).  $^{13}C$  NMR (100 MHz,  $CDCl_3$ )  $\delta$  153.07, 148.93, 137.56, 133.60, 132.75, 132.62, 127.94, 127.69, 125.52, 123.45, 122.08, 121.89, 110.60, 28.27, 26.73, 24.28, 23.51, 14.28, 13.96. HR-MS (ESI) calcd for  $[M + 1]^+$ :  $C_{21}H_{25}N_2$ : 305.2071, found: 325.2071; IR (KBr): 3737, 2961, 2927, 1712, 1587, 1516, 1436, 1376, 758, 698  $cm^{-1}$ .

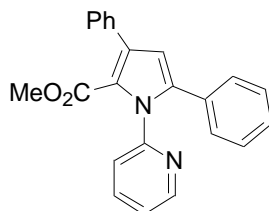

**3v**

**3, 5-Diphenyl-1-pyridin-2-yl-1H-pyrrole-2-carboxylic acid methyl ester (3v):** White solid; 25 mg, 71% yield; m.p. 155-157 °C.  $^1H$  NMR (400 MHz,  $CDCl_3$ )  $\delta$  8.37 – 8.33 (m, 1H), 7.49 (td,  $J$  = 7.7, 1.9 Hz, 1H), 7.25 – 7.15 (m, 8H), 7.14 – 7.07 (m, 3H), 6.93 (s, 1H), 6.87 (d,  $J$  = 7.9 Hz, 1H), 3.72 (s, 3H).  $^{13}C$  NMR (100 MHz,  $CDCl_3$ )  $\delta$  165.08, 151.25, 148.93, 139.96, 137.60, 134.90, 132.19, 131.36, 131.14, 128.41, 128.15, 127.89, 127.34, 126.96, 123.78, 123.00, 114.16, 111.10,

51.04. HR-MS (ESI) calcd for  $[M + 1]^+$ :  $C_{23}H_{19}N_2O_2$ : 355.1441, found: 355.1449; IR (KBr): 3058, 2950, 2918, 1713, 1587, 1470, 1436, 1227, 1118, 792, 760  $cm^{-1}$ .

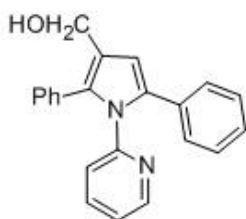

**3w**

**(3, 5-Diphenyl-1-pyridin-2-yl-1H-pyrrol-2-yl)-methanol (3w):** White solid; 20 mg, 61% yield; m.p. 181-183 °C.  $^1H$  NMR (400 MHz,  $CDCl_3$ )  $\delta$ = 8.37 (d,  $J$  = 3.7 Hz, 1H), 7.51 (td,  $J$  = 7.8, 1.7 Hz, 1H), 7.22 – 7.06 (m, 11H), 6.90 (d,  $J$  = 7.9 Hz, 1H), 6.59 (s, 1H), 4.59 (s, 2H).  $^{13}C$  NMR (100 MHz,  $CDCl_3$ )  $\delta$  152.05, 148.89, 137.54, 135.05, 133.89, 132.92, 131.61, 130.38, 128.36, 128.05, 127.91, 127.05, 126.46, 123.69, 122.82, 122.48, 110.68, 58.00. HR-MS (ESI) calcd for  $[M + 1]^+$ :  $C_{22}H_{19}N_2O$ : 327.1492, found: 327.1497; IR (KBr): 3703, 3668, 2960, 2849, 1711, 1598, 1468, 1262, 752, 712  $cm^{-1}$ .

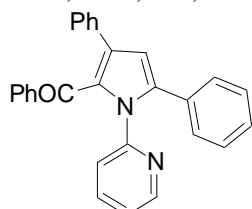

**3x**

**(3, 5-Diphenyl-1-pyridin-2-yl-1H-pyrrol-2-yl)-Phenyl-methanone (3x):** White solid; 32 mg, 80% yield; m.p. 161-163 °C.  $^1H$  NMR (400 MHz,  $CDCl_3$ )  $\delta$ = 8.42 (s, 1H), 7.81 (d,  $J$  = 7.4 Hz, 2H), 7.52 (t,  $J$  = 7.6 Hz, 1H), 7.40 (t,  $J$  = 7.2 Hz, 1H), 7.29 (t,  $J$  = 7.3 Hz, 2H), 7.20 – 7.06 (m, 11H), 6.91 (d,  $J$  = 7.9 Hz, 1H), 6.83 (s, 1H).  $^{13}C$  NMR (100 MHz,  $CDCl_3$ )  $\delta$  192.25, 151.34, 148.98, 139.71, 139.39, 137.75, 134.99, 132.13, 131.57, 131.23, 131.07, 129.62, 128.52, 128.18, 127.82, 127.67, 127.51, 127.05, 123.92, 123.19, 122.76, 112.56. HR-MS (ESI) calcd for  $[M + 1]^+$ :  $C_{28}H_{21}N_2O$ : 401.1648, found: 401.1654; IR (KBr): 3701, 3670, 3058, 2358, 1766, 1590, 1467, 1276, 897, 757  $cm^{-1}$ .

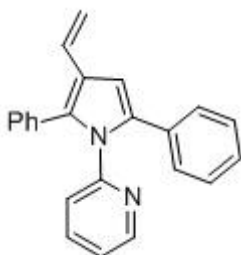

**3y**

**2-(3, 5-Diphenyl-2-vinyl-pyrrol-1-yl)-pyridine (3y):** White solid; 22 mg, 68% yield; m.p. 131-133.4 °C.  $^1H$  NMR (400 MHz,  $CDCl_3$ )  $\delta$ = 8.36 (d,  $J$  = 3.7 Hz, 1H), 7.50 (t,  $J$  = 7.5 Hz, 1H), 7.23 – 7.10 (m, 11H), 6.87 (d,  $J$  = 7.9 Hz, 1H), 6.73 (s, 1H), 6.66 – 6.59 (m, 1H), 5.57 (d,  $J$  = 17.5 Hz, 1H), 5.05 (d,  $J$  = 11.0 Hz, 2H).  $^{13}C$  NMR (100 MHz,  $CDCl_3$ )  $\delta$  151.96, 148.84, 137.45, 135.61, 134.16, 132.88, 131.71, 130.81, 129.47, 128.43, 128.02, 127.81, 127.01, 126.57, 123.63, 122.38,



122.09, 110.79, 106.81. HR-MS (ESI) calcd for  $[M + 1]^+$ :  $C_{23}H_{19}N_2$ : 323.1543, found: 323.1552; IR (KBr): 3703, 3668, 3306, 3184, 2358, 1766, 1600, 1274, 1020, 753  $cm^{-1}$ .

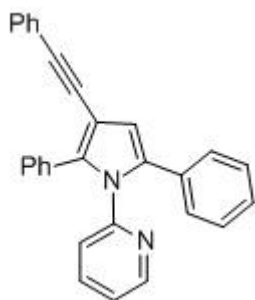

**3z**

**2-(3,5-Diphenyl-2-phenylethynyl-pyrrol-1-yl)-pyridine (3z):** White solid; 17 mg, 43% yield; m.p. 160.2-163 °C.  $^1H$  NMR (400 MHz,  $CDCl_3$ )  $\delta$ = 8.59 (d,  $J$  = 4.3 Hz, 1H), 7.95 (d,  $J$  = 7.7 Hz, 2H), 7.78 (t,  $J$  = 7.7 Hz, 1H), 7.44 (t,  $J$  = 7.5 Hz, 2H), 7.36 (d,  $J$  = 7.9 Hz, 1H), 7.34 – 7.29 (m, 2H), 7.27 – 7.16 (m, 10H), 6.73 (s, 1H).  $^{13}C$  NMR (100 MHz,  $CDCl_3$ )  $\delta$  151.61, 149.06, 137.67, 136.61, 134.80, 132.29, 130.69, 130.64, 128.45, 128.27, 128.25, 128.05, 127.79, 127.11, 126.98, 126.65, 123.48, 122.97, 122.93, 114.55, 109.93, 96.12, 82.62. HR-MS (ESI) calcd for  $[M + 1]^+$ :  $C_{29}H_{21}N_2$ : 397.1699, found: 397.1704; IR (KBr): 3482, 3415, 2921, 2850, 2199, 2026, 1640, 1591, 1467, 1101, 758, 693  $cm^{-1}$ .

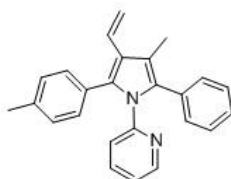

**3za**

**2-(3-Methyl-2-phenyl-4-p-tolyl-5-vinyl-pyrrol-1-yl)-pyridine (3za):** White solid; 15 mg, 43% yield; m.p. 142-144 °C.  $^1H$  NMR (400 MHz,  $CDCl_3$ )  $\delta$ = 8.26 (d,  $J$  = 4.1 Hz, 1H), 7.40 (t,  $J$  = 7.2 Hz, 1H), 7.24 – 6.98 (m, 10H), 6.78 (d,  $J$  = 7.9 Hz, 1H), 6.68 (dd,  $J$  = 18.0, 11.8 Hz, 1H), 5.44 (d,  $J$  = 17.9 Hz, 1H), 5.08 (d,  $J$  = 11.9 Hz, 1H), 2.30 (s, 3H), 2.28 (s, 3H).  $^{13}C$  NMR (100 MHz,  $CDCl_3$ )  $\delta$  152.22, 148.55, 137.05, 136.58, 133.48, 132.50, 132.39, 130.82, 130.68, 130.58, 129.25, 128.53, 127.74, 126.51, 123.56, 121.83, 120.27, 116.61, 112.25, 21.21, 12.10. HR-MS (ESI) calcd for  $[M + 1]^+$ :  $C_{25}H_{23}N_2$ : 351.1856, found: 351.1865; IR (KBr): 3554, 3411, 2919, 2852, 2026, 1636, 1103, 618  $cm^{-1}$ .

### 1.9 Procedure for synthesis of 2,3,5-triphenyl-1H-pyrrole (4a)

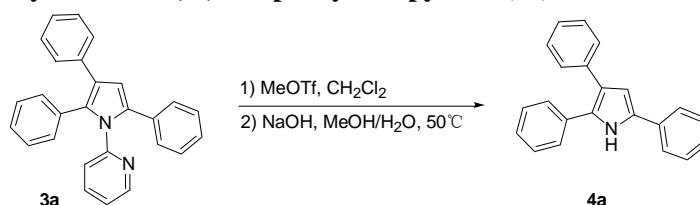

The solution of methyl trifluoromethanesulfonate (17 mg, 0.1 mmol) in  $CH_2Cl_2$  (1.0 mL) was added dropwise to a solution of pyrrole **3a** (37 mg, 0.1 mmol) in  $CH_2Cl_2$  (2 mL) at 0 °C, and the resulting solution was stirred for 12 h at room temperature. Then the solvent was removed under vacuum, and residue was dissolved in MeOH (2.0 mL). An aqueous NaOH solution (2.0 M, 0.5

mL) was added, and the mixture was stirred at 50 °C for 6 h. After the solvent was removed under vacuum, and the resulting residue was extracted with CH<sub>2</sub>Cl<sub>2</sub> (3 × 10 mL). The combined organic layers were dried and concentrated. The resulted residue was purified by flash column chromatography to afford **4a**<sup>[4]</sup> as a white solid (22 mg, 75%), <sup>1</sup>H NMR (400 MHz, CDCl<sub>3</sub>) δ= 8.35 (s, 1H), 7.50 (d, *J* = 7.7 Hz, 2H), 7.40 – 7.34 (m, 6H), 7.32 – 7.17 (m, 7H), 6.67 (d, *J* = 1.7 Hz, 1H). <sup>13</sup>C NMR (100 MHz, CDCl<sub>3</sub>) δ 136.46, 133.17, 132.30, 129.40, 129.05, 128.79, 128.51, 128.42, 127.58, 127.05, 126.60, 126.03, 123.93, 123.88, 108.68. MS (ESI): *m/z* = 295.14 [*M*<sup>+</sup>].

## 2. Controlled experiments for mechanism studies

### (a) Pd(II)-catalyzed cyclization of ketoimine (**1t**) with alkyne (**2a**) under our standard reaction conditions.

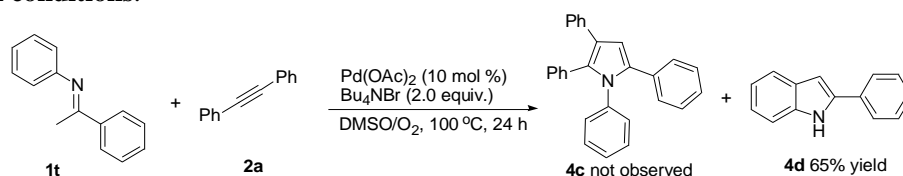

To the solution of ketoimine **1t** (0.1 mmol) in dry DMSO (1.0 mL) were added alkyne **2a** (0.1 mmol), Pd(OAc)<sub>2</sub> (2.0 mg, 10 mol %) and Bu<sub>4</sub>NBr (65 mg, 0.2 mmol) under O<sub>2</sub> atmosphere. The reaction mixture was stirred at 100 °C for 24 h. After the reaction mixture was cooled down to room temperature, and 1.0 mL of H<sub>2</sub>O was added, then extracted with CH<sub>2</sub>Cl<sub>2</sub> (3×10 mL). The corresponding combined organic layers were dried over Na<sub>2</sub>SO<sub>4</sub>, and concentrated under vacuum and purified by flash chromatography on silica gel using 10% (v/v) ethyl acetate in petroleum ether as eluent to give the compound **4d**.<sup>[5]</sup> <sup>1</sup>H NMR (400 MHz, CDCl<sub>3</sub>) δ= 8.28 (s, 1H), 7.63 (t, *J* = 5.8 Hz, 3H), 7.45 – 7.35 (m, 3H), 7.31 (t, *J* = 7.3 Hz, 1H), 7.20 (dd, *J* = 14.4, 7.2 Hz, 1H), 7.12 (t, *J* = 7.4 Hz, 1H), 6.82 (s, 1H). <sup>13</sup>C NMR (100 MHz, CDCl<sub>3</sub>) δ 137.92, 136.85, 132.40, 129.30, 129.06, 127.75, 125.20, 122.39, 120.71, 120.32, 110.94, 100.03.

### (b) H/D Exchange of *N*-(2-pyridyl) ketoimine (**1a**)

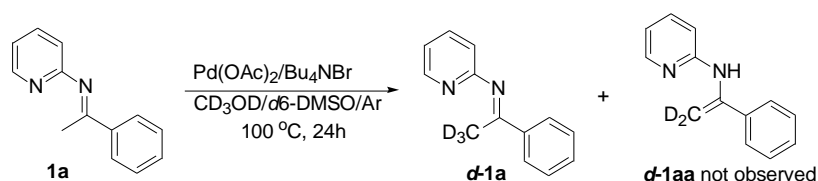

To the solution of ketoimine **1a** (0.1 mmol) in dry *d*<sub>6</sub>-DMSO (1.0 mL) were added CD<sub>3</sub>OD (0.5 mL) Pd(OAc)<sub>2</sub> (2.0 mg, 10 mol %) and Bu<sub>4</sub>NBr (65 mg, 0.2 mmol) under Ar. The reaction mixture was stirred for 100 °C and then cooled down to room temperature. After removal of solvent the resulted crude was purified by flash column chromatography to give the desired compound **d-1a** (25% yield) as oil. <sup>1</sup>H NMR (400 MHz, *d*-DMSO) δ= 8.42 (d, *J* = 4.7 Hz, 1H), 8.02 (d, *J* = 7.8 Hz, 2H), 7.80 (t, *J* = 7.7 Hz, 1H), 7.58 – 7.48 (m, 3H), 7.14 – 7.10 (m, 1H), 6.89 (d, *J* = 8.0 Hz, 1H), 2.18 (s, 0.26H). <sup>13</sup>C NMR (100 MHz, CDCl<sub>3</sub>) δ 167.68, 163.53, 148.85, 139.02, 137.70, 130.89, 128.33, 127.44, 118.85, 115.18. HR-MS (ESI) calcd for [*M*+1]<sup>+</sup>: C<sub>13</sub>H<sub>10</sub>D<sub>3</sub>N<sub>2</sub>: 200.1262, found: 200.1262.

### (c): Kinetic isotope effect of this transformation

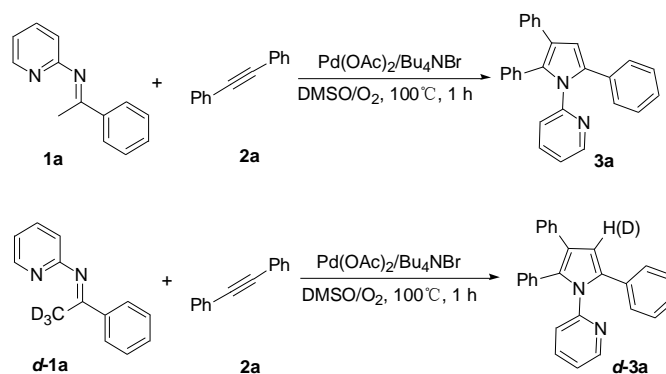

A sample experimental set-up is shown as follows: ketoimine (**1a**: 20 mg, 0.1 mmol; or **d-1a**: 20 mg, 0.1 mmol) in dry DMSO (2.0 mL) were added alkynes **2a** (0.1 mmol), Pd(OAc)<sub>2</sub> (2 mg, 10 mol %) and Bu<sub>4</sub>NBr (65 mg, 0.2 mmol) under O<sub>2</sub> atmosphere, and then the corresponding reaction mixture was stirred in a sealed tube for 100 °C. Aliquots (0.4 mL) were removed at 10 minutes intervals for the first 50 minutes of the reaction. Each aliquot was removed under reduced pressure and analyzed by <sup>1</sup>H NMR spectrum (see **Figure 1** and **Figure 2**). A sample plot of the initial rate data for reactions of both **1a** and **d-1a** was shown in **Figure 3**. The reaction progress in the early stage (0-60 min) indicated a kinetic isotope effect of 1.52. Then above reaction was combined, added 1.0 mL of H<sub>2</sub>O. Then the mixture was extracted with DCM (3×10 mL), and the corresponding crude **d-3a** was purified by flash chromatography on silical gel using 10% ethyl acetate in petroleum ether as eluent. **d-3a**: <sup>1</sup>H NMR (400 MHz, CDCl<sub>3</sub>) δ 8.38 (d, *J* = 4.6 Hz, 1H), 7.50 (t, *J* = 7.7 Hz, 1H), 7.29 – 7.08 (m, 16H), 6.93 (d, *J* = 7.9 Hz, 1H), 6.70 (s, 0.25 H). <sup>13</sup>C NMR (100 MHz, CDCl<sub>3</sub>) δ 152.19, 148.82, 137.42, 136.06, 135.01, 132.93, 132.58, 132.24, 131.26, 128.31, 128.14, 128.08, 127.90, 127.02, 126.46, 125.62, 123.97, 122.52, 110.65.

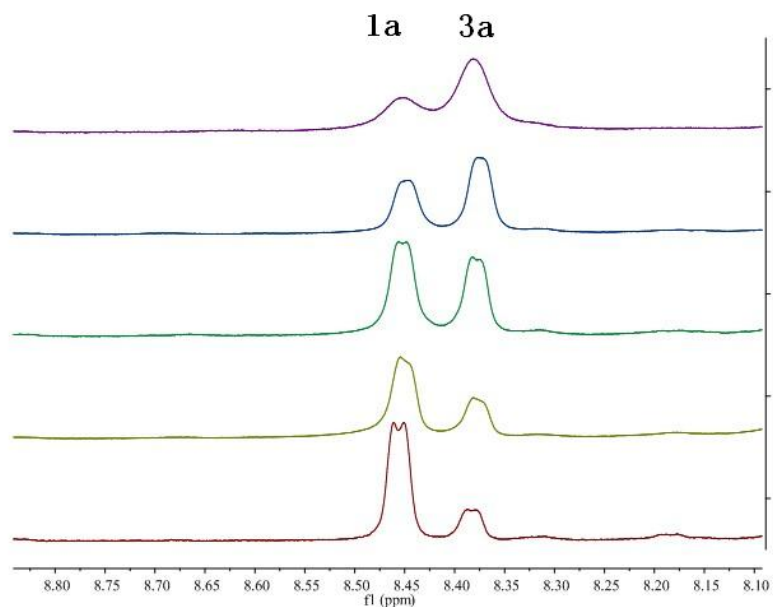

**Figure 1.** The conversion of **1a** was monitored by <sup>1</sup>H NMR method

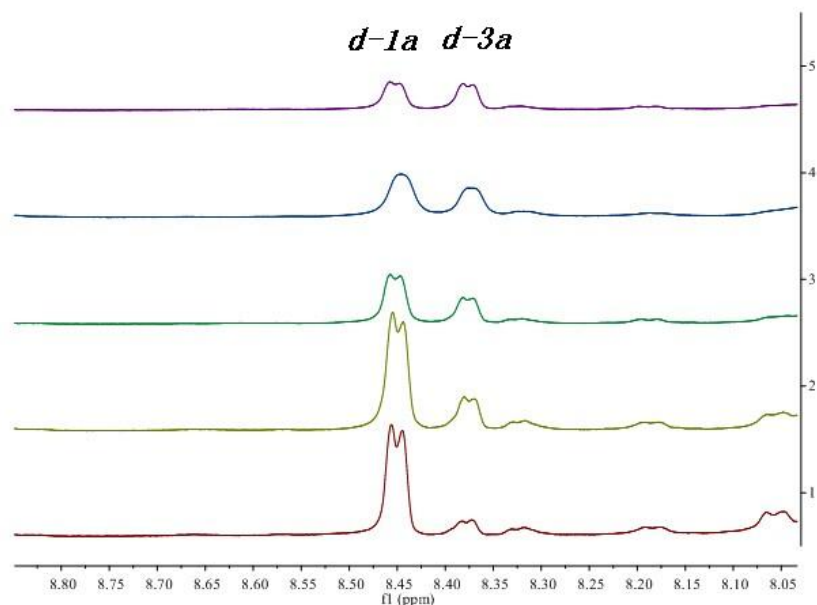

**Figure 2.** The conversion of *d-1a* was monitored by  $^1\text{H}$  NMR method

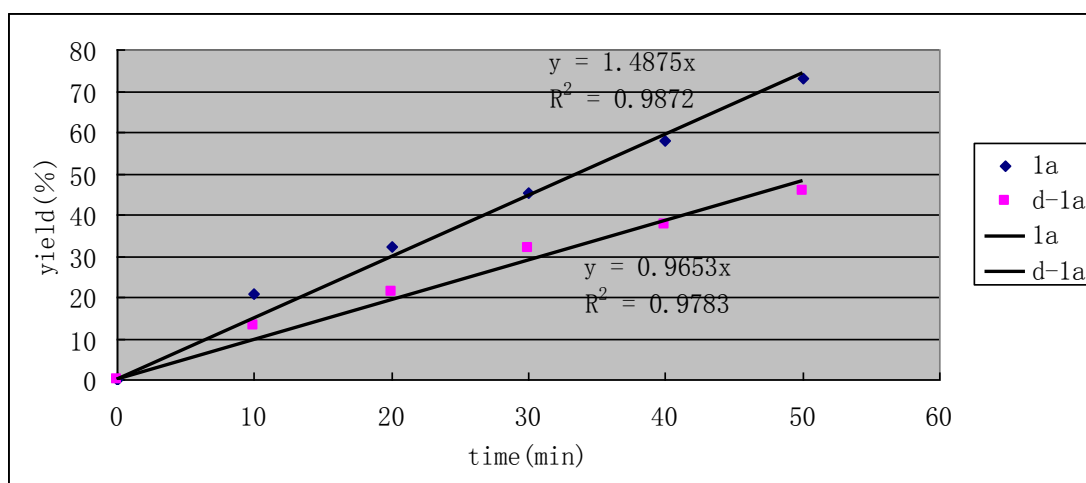

**Figure 3.** The plot of initial rates for KIE measurements

**(d): The KIE determination via competitive experiment between 1a and d-1a**

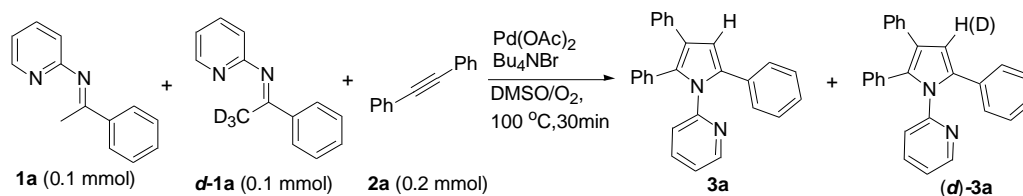

A sample experimental set-up is described as follows: ketoimine (**1a**: 20 mg, 0.1 mmol; and **d-1a**: 20 mg, 0.1 mmol) in dry DMSO (4.0 mL) were added alkynes **2a** (0.2 mmol), Pd(OAc)<sub>2</sub> (4 mg, 10 mol %) and Bu<sub>4</sub>NBr (130.0 mg, 0.4 mmol) under O<sub>2</sub> atmosphere, and then the corresponding reaction mixture was stirred in a sealed tube for 100 °C. Aliquots (0.4 mL) were removed at 10 minutes intervals for the first 30 minutes of the reaction. Each aliquot was removed

under reduced pressure and analyzed by  $^1\text{H}$  NMR. A sample plot of the initial rate data for reactions of both **1a** and *d-1a* was shown in **Figure 4**. The reaction progress in the early stage (0-30min) indicated a kinetic isotope effect of 3.0 (KIE = 3.0).

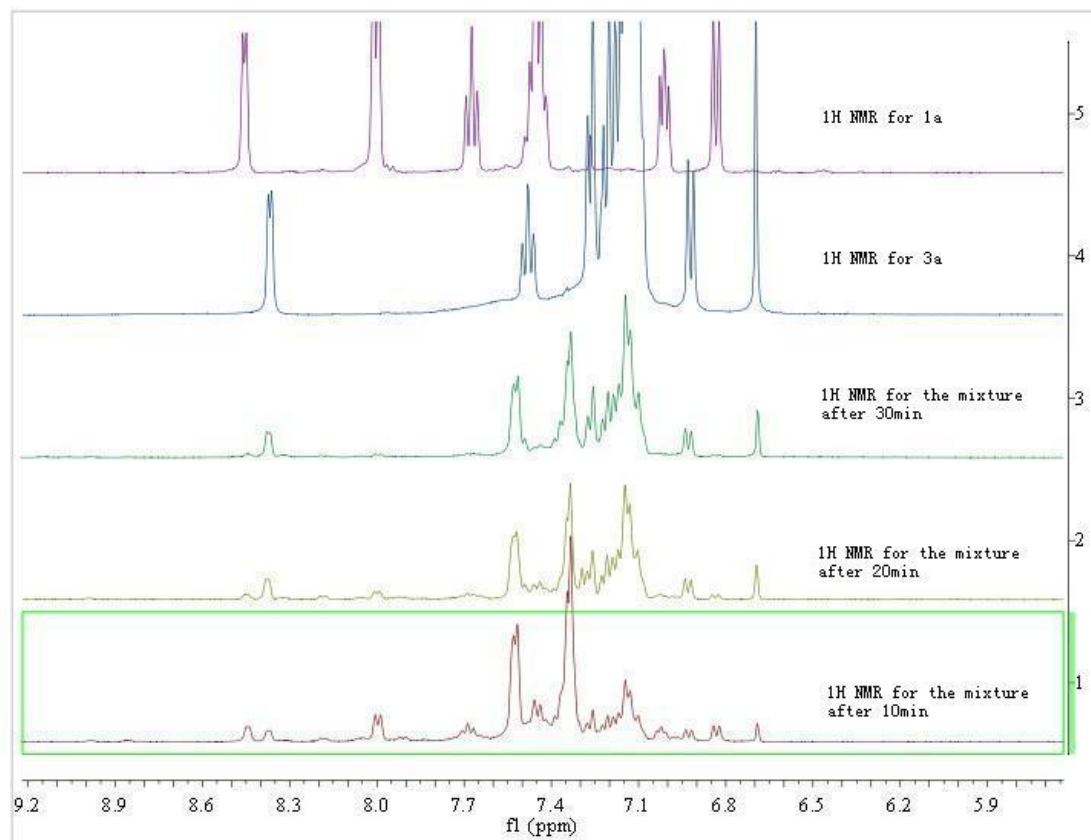

**Figure 4.** The conversion of **1a** and *d-1a* was monitored by  $^1\text{H}$  NMR method

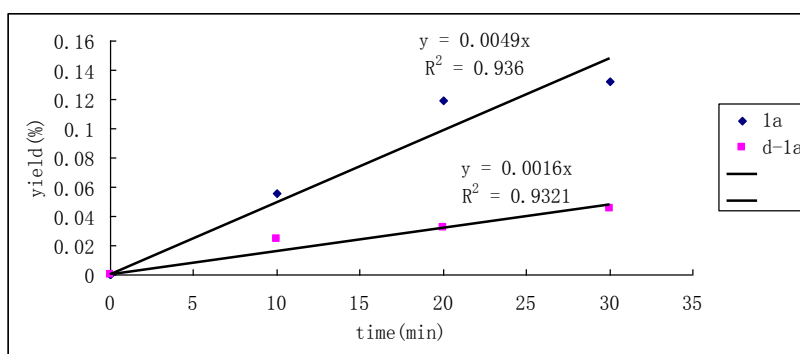

**Figure 5.** The plot of initial rates for KIE measurements

### 3. Single crystal data about 3I

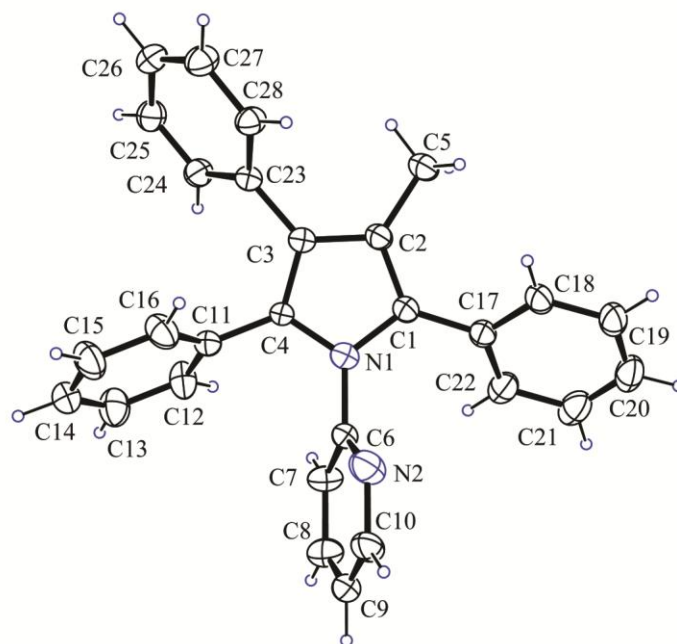

**Figure 4.** The single crystal structure of **3I**

Table 6. Crystal data and structure refinement for SAD

|                                      |                           |
|--------------------------------------|---------------------------|
| Empirical formula                    | $C_{28}H_{22}N_2$         |
| Formula weight                       | 386.48                    |
| Crystal system                       | Monoclinic                |
| Temperature                          | 293 K                     |
| Wavelength                           | 0.71073 Å                 |
| Space group                          | P 21/c                    |
| a (Å)                                | 12.208(2)                 |
| b (Å)                                | 9.4997(19)                |
| c (Å)                                | 19.300(7)                 |
| $\alpha$ (°)                         | 90                        |
| $\beta$ (°)                          | 109.62(3)                 |
| $\gamma$ (°)                         | 90                        |
| V (Å <sup>3</sup> )                  | 2108.3(9)                 |
| Z                                    | 4                         |
| D <sub>c</sub> (g cm <sup>-3</sup> ) | 1.218                     |
| Crystal size (mm)                    | 0.25 × 0.20 × 0.20        |
| F (000)                              | 816                       |
| Range / °                            | 3.10 to 27.48             |
| Reflections collected / unique       | 4818/2506[R(int)= 0.0297] |
| Data / restraints / parameters       | 4818/0/ 273               |
| Goodness-of-fit on F <sup>2</sup>    | 1.092                     |

**Table 7. Atomic coordinates and equivalent isotropic displacement parameters for shelx. U (eq) is defined as one third of the trace of the orthogonalized Uij tensor.**

|       | x          | y          | z            | U(eq)      |
|-------|------------|------------|--------------|------------|
| N(1)  | 0.2100(2)  | -0.2253(2) | -0.12453(11) | 0.0678(6)  |
| N(2)  | 0.3306(3)  | -0.0726(3) | -0.02713(15) | 0.0977(9)  |
| C(1)  | 0.2518(2)  | -0.2208(3) | -0.18342(13) | 0.0602(6)  |
| C(2)  | 0.1548(2)  | -0.2155(3) | -0.24753(14) | 0.0614(6)  |
| C(3)  | 0.0557(2)  | -0.2167(3) | -0.22724(13) | 0.0589(6)  |
| C(4)  | 0.0909(2)  | -0.2228(2) | -0.15126(11) | 0.0498(5)  |
| C(5)  | 0.1548(3)  | -0.2223(4) | -0.32500(14) | 0.0773(8)  |
| C(6)  | 0.2780(2)  | -0.2008(3) | -0.04769(13) | 0.0559(6)  |
| C(7)  | 0.2889(3)  | -0.3025(3) | 0.00203(14)  | 0.0738(8)  |
| C(8)  | 0.3519(3)  | -0.2769(4) | 0.07358(18)  | 0.0885(9)  |
| C(9)  | 0.4057(3)  | -0.1536(3) | 0.09611(16)  | 0.0756(8)  |
| C(10) | 0.3959(3)  | -0.0514(4) | 0.04676(17)  | 0.0843(9)  |
| C(11) | 0.0181(2)  | -0.2103(3) | -0.10621(13) | 0.0611(6)  |
| C(12) | 0.0120(3)  | -0.3161(3) | -0.06222(19) | 0.0826(9)  |
| C(13) | -0.0572(3) | -0.3044(4) | -0.0201(2)   | 0.1015(11) |
| C(14) | -0.1225(3) | -0.1877(4) | -0.02247(18) | 0.0891(10) |
| C(15) | -0.1165(4) | -0.0806(4) | -0.0671(2)   | 0.1038(12) |
| C(16) | -0.0469(3) | -0.0918(4) | -0.10992(18) | 0.0898(10) |
| C(17) | 0.3744(2)  | -0.2300(3) | -0.17709(14) | 0.0661(7)  |
| C(18) | 0.4167(3)  | -0.1490(3) | -0.22278(16) | 0.0776(8)  |
| C(19) | 0.5309(3)  | -0.1597(5) | -0.2195(2)   | 0.0993(12) |
| C(20) | 0.6042(4)  | -0.2510(5) | -0.1709(3)   | 0.1065(13) |
| C(21) | 0.5659(3)  | -0.3289(4) | -0.1242(2)   | 0.1000(11) |
| C(22) | 0.4513(3)  | -0.3188(3) | -0.12764(18) | 0.0819(9)  |
| C(23) | -0.0671(2) | -0.2152(3) | -0.27519(13) | 0.0580(6)  |
| C(24) | -0.1455(3) | -0.3164(3) | -0.27066(15) | 0.0682(7)  |

|       |            |            |              |           |
|-------|------------|------------|--------------|-----------|
| C(25) | -0.2586(3) | -0.3135(3) | -0.31641(17) | 0.0776(8) |
| C(26) | -0.2964(3) | -0.2109(3) | -0.36906(17) | 0.0795(8) |
| C(27) | -0.2198(3) | -0.1110(3) | -0.37503(18) | 0.0822(9) |
| C(28) | -0.1064(3) | -0.1123(3) | -0.32845(15) | 0.0688(7) |

**Table 8. Bond lengths [Å] for shelxl**

| Bond        | Lengths [Å] |
|-------------|-------------|
| N(1)-C(4)   | 1.369(3)    |
| N(1)-C(1)   | 1.395(3)    |
| N(1)-C(6)   | 1.455(3)    |
| N(2)-C(6)   | 1.371(4)    |
| N(2)-C(10)  | 1.395(4)    |
| C(1)-C(2)   | 1.398(4)    |
| C(1)-C(17)  | 1.462(4)    |
| C(2)-C(3)   | 1.391(3)    |
| C(2)-C(5)   | 1.497(3)    |
| C(3)-C(4)   | 1.384(3)    |
| C(3)-C(23)  | 1.474(4)    |
| C(4)-C(11)  | 1.442(3)    |
| C(6)-C(7)   | 1.337(3)    |
| C(7)-C(8)   | 1.358(4)    |
| C(8)-C(9)   | 1.342(4)    |
| C(9)-C(10)  | 1.337(4)    |
| C(11)-C(12) | 1.334(4)    |
| C(11)-C(16) | 1.366(4)    |
| C(12)-C(13) | 1.360(4)    |
| C(13)-C(14) | 1.357(5)    |
| C(14)-C(15) | 1.350(5)    |
| C(15)-C(16) | 1.374(4)    |
| C(17)-C(22) | 1.379(4)    |
| C(17)-C(18) | 1.394(4)    |



|             |          |
|-------------|----------|
| C(18)-C(19) | 1.378(5) |
| C(19)-C(20) | 1.368(6) |
| C(20)-C(21) | 1.363(6) |
| C(21)-C(22) | 1.382(4) |
| C(23)-C(24) | 1.380(4) |
| C(23)-C(28) | 1.382(4) |
| C(24)-C(25) | 1.366(4) |
| C(25)-C(26) | 1.372(4) |
| C(26)-C(27) | 1.363(4) |
| C(27)-C(28) | 1.375(4) |

**Table 9. Anisotropic displacement parameters for shelxl.**

|       | U11        | U22        | U33        | U23         | U13         | U12         |
|-------|------------|------------|------------|-------------|-------------|-------------|
| N(1)  | 0.0703(15) | 0.0797(14) | 0.0540(12) | -0.0037(10) | 0.0215(11)  | 0.0029(11)  |
| N(2)  | 0.117(3)   | 0.101(2)   | 0.0817(18) | -0.0126(15) | 0.0420(18)  | -0.0142(17) |
| C(1)  | 0.0591(16) | 0.0695(14) | 0.0543(13) | -0.0070(11) | 0.0221(12)  | -0.0019(12) |
| C(2)  | 0.0629(16) | 0.0724(15) | 0.0499(12) | -0.0041(11) | 0.0201(12)  | -0.0064(12) |
| C(3)  | 0.0583(15) | 0.0674(14) | 0.0492(12) | -0.0006(11) | 0.0158(11)  | 0.0003(11)  |
| C(4)  | 0.0461(13) | 0.0613(12) | 0.0412(11) | 0.0007(9)   | 0.0134(10)  | -0.0007(10) |
| C(5)  | 0.079(2)   | 0.102(2)   | 0.0531(14) | -0.0092(14) | 0.0259(14)  | -0.0116(16) |
| C(6)  | 0.0548(14) | 0.0633(13) | 0.0501(12) | -0.0054(10) | 0.0181(11)  | 0.0011(11)  |
| C(7)  | 0.089(2)   | 0.0620(14) | 0.0568(15) | 0.0034(12)  | 0.0070(15)  | -0.0039(13) |
| C(8)  | 0.096(3)   | 0.088(2)   | 0.0687(18) | 0.0046(16)  | 0.0105(18)  | 0.0100(18)  |
| C(9)  | 0.0626(18) | 0.101(2)   | 0.0626(16) | -0.0114(16) | -0.0114(16) | 0.0045(16)  |
| C(10) | 0.094(2)   | 0.095(2)   | 0.0668(18) | -0.0242(17) | 0.0310(17)  | -0.0242(17) |
| C(11) | 0.0569(15) | 0.0735(15) | 0.0516(13) | -0.0067(11) | 0.0164(12)  | -0.0041(12) |
| C(12) | 0.082(2)   | 0.0722(16) | 0.111(2)   | 0.0176(16)  | 0.055(2)    | 0.0121(14)  |
| C(13) | 0.097(3)   | 0.103(3)   | 0.118(3)   | 0.015(2)    | 0.054(2)    | 0.000(2)    |
| C(14) | 0.076(2)   | 0.119(3)   | 0.077(2)   | -0.0098(19) | 0.0323(18)  | 0.0033(19)  |
| C(15) | 0.119(3)   | 0.113(3)   | 0.098(2)   | -0.001(2)   | 0.061(2)    | 0.030(2)    |
| C(16) | 0.111(3)   | 0.0861(19) | 0.085(2)   | 0.0074(16)  | 0.049(2)    | 0.0241(18)  |
| C(17) | 0.0603(16) | 0.0807(16) | 0.0594(14) | -0.0205(13) | 0.0231(13)  | -0.0045(13) |
| C(18) | 0.0731(19) | 0.102(2)   | 0.0645(16) | -0.0220(15) | 0.0323(15)  | -0.0159(16) |
| C(19) | 0.076(2)   | 0.146(3)   | 0.086(2)   | -0.046(2)   | 0.041(2)    | -0.029(2)   |
| C(20) | 0.067(2)   | 0.146(3)   | 0.114(3)   | -0.057(3)   | 0.039(2)    | -0.014(2)   |
| C(21) | 0.068(2)   | 0.109(2)   | 0.113(3)   | -0.031(2)   | 0.019(2)    | 0.0109(18)  |
| C(22) | 0.0651(19) | 0.0856(19) | 0.090(2)   | -0.0146(16) | 0.0188(17)  | 0.0010(15)  |

|       |            |            |            |             |            |             |
|-------|------------|------------|------------|-------------|------------|-------------|
| C(23) | 0.0587(15) | 0.0656(14) | 0.0486(12) | -0.0034(11) | 0.0168(11) | 0.0168(11)  |
| C(24) | 0.0661(18) | 0.0691(15) | 0.0675(16) | 0.0080(12)  | 0.0201(14) | -0.0063(13) |
| C(25) | 0.0674(19) | 0.0820(18) | 0.083(2)   | 0.0014(15)  | 0.0243(17) | -0.0145(14) |
| C(26) | 0.0594(17) | 0.096(2)   | 0.0736(18) | 0.0004(16)  | 0.0097(15) | -0.0028(15) |
| C(27) | 0.076(2)   | 0.0828(18) | 0.0786(19) | 0.0141(16)  | 0.0144(17) | 0.0054(16)  |
| C(28) | 0.0647(17) | 0.0697(15) | 0.0657(15) | 0.0079(13)  | 0.0135(14) | -0.0049(13) |

**Table 10. Hydrogen coordinates and isotropic displacement parameters for shelxl.**

|        | x       | y       | z       | U(eq) |
|--------|---------|---------|---------|-------|
| H(5A)  | 0.0813  | -0.2576 | -0.3565 | 0.116 |
| H(5B)  | 0.2159  | -0.2838 | -0.3273 | 0.116 |
| H(5C)  | 0.1674  | -0.1297 | -0.3409 | 0.116 |
| H(7A)  | 0.2538  | -0.3896 | -0.0122 | 0.089 |
| H(8A)  | 0.3579  | -0.3473 | 0.1082  | 0.106 |
| H(9A)  | 0.4492  | -0.1395 | 0.1454  | 0.091 |
| H(10A) | 0.4329  | 0.0345  | 0.0618  | 0.101 |
| H(12A) | 0.0550  | -0.3976 | -0.0604 | 0.099 |
| H(13A) | -0.0599 | -0.3780 | 0.0111  | 0.122 |
| H(14A) | -0.1704 | -0.1816 | 0.0061  | 0.107 |
| H(15A) | -0.1596 | 0.0009  | -0.0688 | 0.125 |
| H(16A) | -0.0441 | -0.0188 | -0.1414 | 0.108 |
| H(18A) | 0.3672  | -0.0867 | -0.2559 | 0.093 |
| H(19A) | 0.5580  | -0.1050 | -0.2503 | 0.119 |
| H(20A) | 0.6807  | -0.2600 | -0.1696 | 0.128 |
| H(21A) | 0.6168  | -0.3886 | -0.0902 | 0.120 |
| H(22A) | 0.4255  | -0.3730 | -0.0960 | 0.098 |
| H(24A) | -0.1210 | -0.3877 | -0.2359 | 0.082 |
| H(25A) | -0.3104 | -0.3817 | -0.3118 | 0.093 |
| H(26A) | -0.3733 | -0.2094 | -0.4003 | 0.095 |

|        |         |         |         |       |
|--------|---------|---------|---------|-------|
| H(27A) | -0.2445 | -0.0415 | -0.4109 | 0.099 |
| H(28A) | -0.0554 | -0.0430 | -0.3328 | 0.083 |

**Table 11. Bond angles [deg] for shelxl.**

| Bond              | Bond angles [deg] |
|-------------------|-------------------|
| C(4)-N(1)-C(1)    | 109.0(2)          |
| C(4)-N(1)-C(6)    | 123.47(19)        |
| C(1)-N(1)-C(6)    | 125.9(2)          |
| C(6)-N(2)-C(10)   | 118.4(3)          |
| N(1)-C(1)-C(2)    | 106.8(2)          |
| N(1)-C(1)-C(17)   | 125.1(2)          |
| C(2)-C(1)-C(17)   | 128.0(2)          |
| C(3)-C(2)-C(1)    | 108.0(2)          |
| C(3)-C(2)-C(5)    | 125.0(3)          |
| C(1)-C(2)-C(5)    | 126.7(3)          |
| C(4)-C(3)-C(2)    | 107.9(2)          |
| C(4)-C(3)-C(23)   | 123.7(2)          |
| C(2)-C(3)-C(23)   | 128.3(2)          |
| N(1)-C(4)-C(3)    | 108.3(2)          |
| N(1)-C(4)-C(11)   | 124.4(2)          |
| C(3)-C(4)-C(11)   | 126.9(2)          |
| C(7)-C(6)-N(2)    | 120.7(3)          |
| C(7)-C(6)-N(1)    | 120.1(2)          |
| N(2)-C(6)-N(1)    | 119.3(2)          |
| C(6)-C(7)-C(8)    | 119.1(3)          |
| C(9)-C(8)-C(7)    | 122.3(3)          |
| C(10)-C(9)-C(8)   | 119.1(3)          |
| C(9)-C(10)-N(2)   | 120.4(3)          |
| C(12)-C(11)-C(16) | 119.9(2)          |
| C(12)-C(11)-C(4)  | 120.0(2)          |
| C(16)-C(11)-C(4)  | 120.1(2)          |

|                   |          |
|-------------------|----------|
| C(11)-C(12)-C(13) | 119.9(3) |
| C(14)-C(13)-C(12) | 121.4(3) |
| C(15)-C(14)-C(13) | 118.7(3) |
| C(14)-C(15)-C(16) | 120.1(3) |
| C(11)-C(16)-C(15) | 119.9(3) |
| C(22)-C(17)-C(18) | 117.7(3) |
| C(22)-C(17)-C(1)  | 122.3(3) |
| C(18)-C(17)-C(1)  | 120.0(3) |
| C(19)-C(18)-C(17) | 121.0(4) |
| C(20)-C(19)-C(18) | 119.8(4) |
| C(21)-C(20)-C(19) | 120.5(4) |
| C(20)-C(21)-C(22) | 119.8(4) |
| C(17)-C(22)-C(21) | 121.2(3) |
| C(24)-C(23)-C(28) | 117.7(3) |
| C(24)-C(23)-C(3)  | 122.3(2) |
| C(28)-C(23)-C(3)  | 120.0(2) |
| C(25)-C(24)-C(23) | 121.1(3) |
| C(24)-C(25)-C(26) | 120.6(3) |
| C(27)-C(26)-C(25) | 119.2(3) |
| C(26)-C(27)-C(28) | 120.5(3) |
| C(27)-C(28)-C(23) | 121.0(3) |

---

#### 4. References

1. Dowerah, D.; Radonovich, L. J.; Woolsey, N. F. *Organometallics* **1990**, *9*, 614-620.
2. Kang, B.; Kim, D. H.; Do, Y.; Chang, S. *Org. Lett.* **2003**, *5*, 3041-3043.
3. Pati, A. K.; Mohapatra, M.; Ghosh, P.; Gharpure, S. J.; Mishra, A. K. *J. Phys. Chem.* **2003**, *117*, 6548-6560.
4. Jana, C. K.; Grimme, S.; Studer, A. *Chem. -Eur. J.* **2009**, *15*, 9078 – 9084.
5. Wei, Y.; Deb, I.; Yoshikai, N. *J. Am. Chem. Soc.* **2012**, *134*, 9098-9101.

## 5. $^1\text{H}$ NMR and $^{13}\text{C}$ NMR spectrum for all isolated products.

1) (*E*)-*N*-(1-phenylethylidene)pyridin-2-amine (**1a**) (Using  $\text{CDCl}_3$  as solvent)

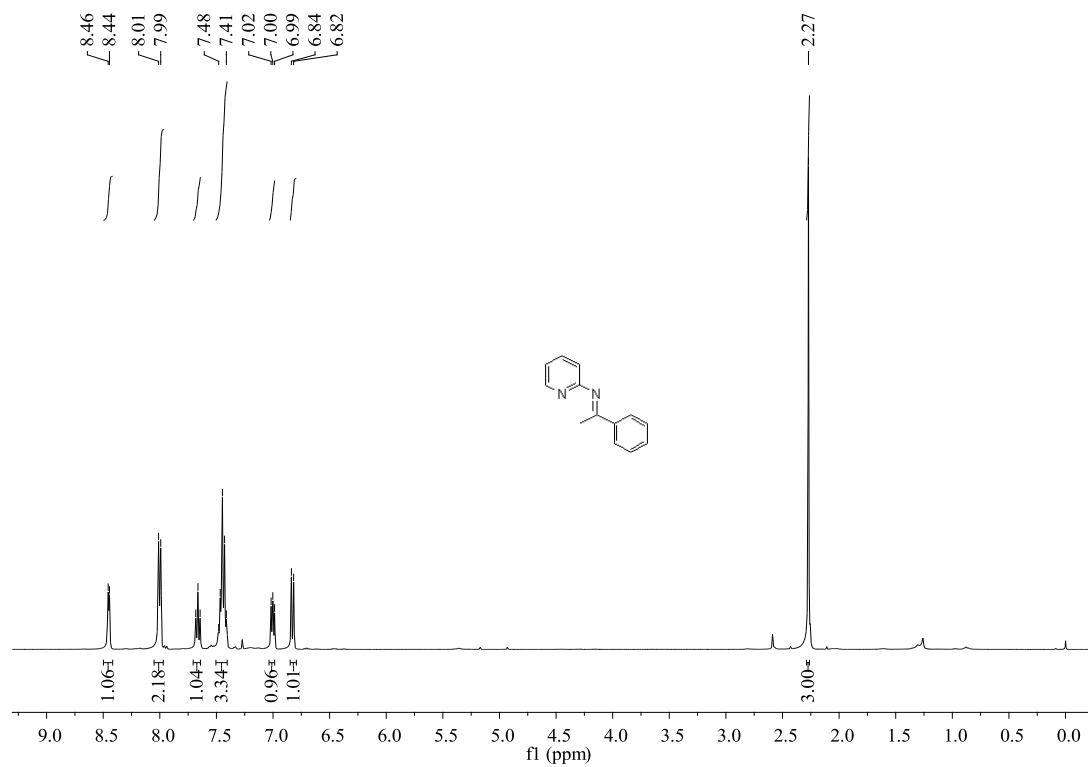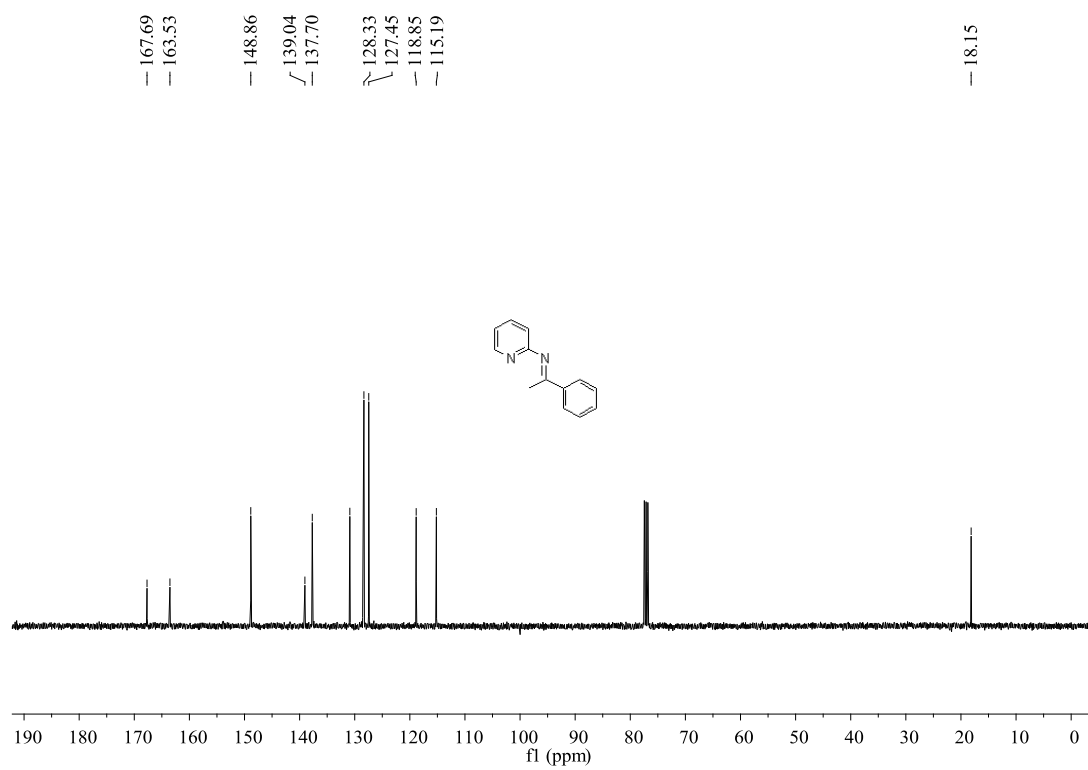

2) (*E*)-*N*-(1-(*p*-tolyl)ethylidene)pyridin-2-amine (**1b**): (Using CDCl<sub>3</sub> as solvent)

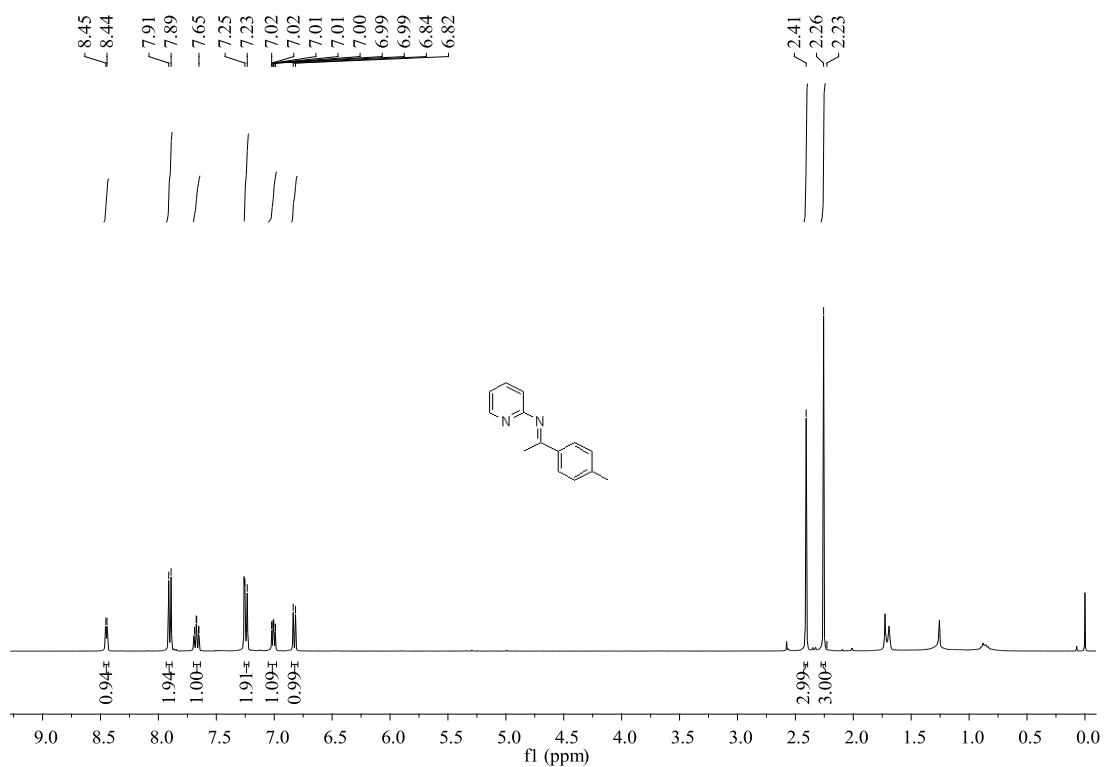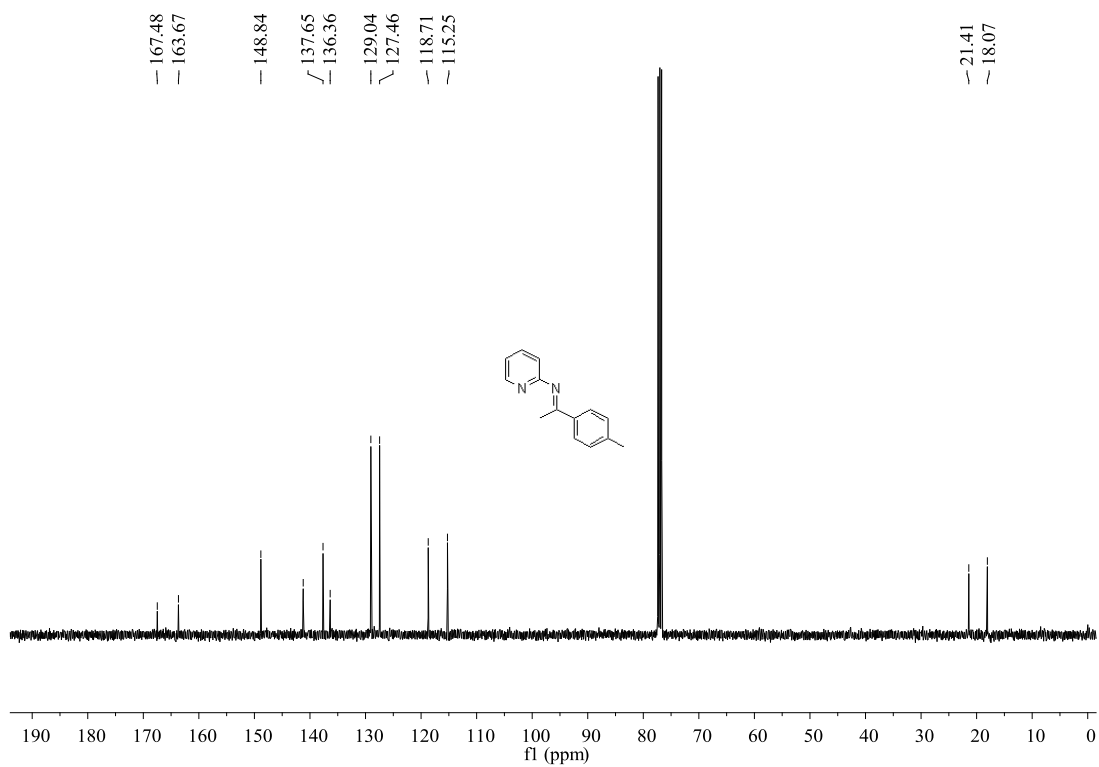

3) *(E)*-*N*-(1-(4-methoxyphenyl)ethylidene)pyridin-2-amine (**1c**): (Using CDCl<sub>3</sub> as solvent)

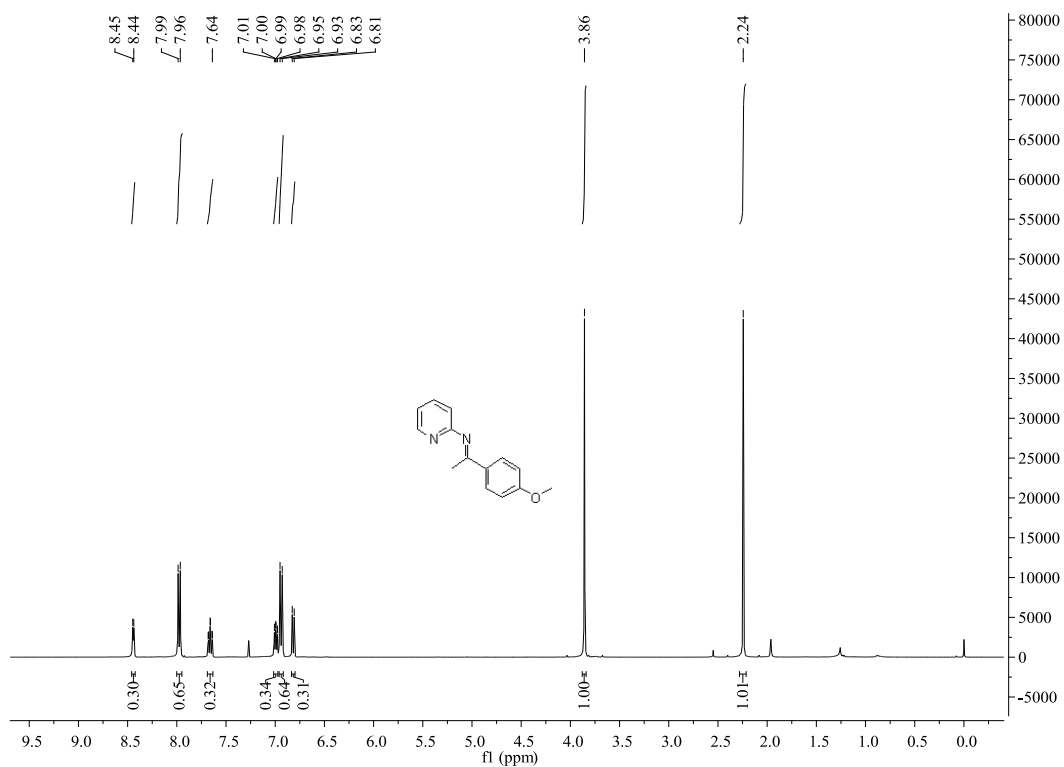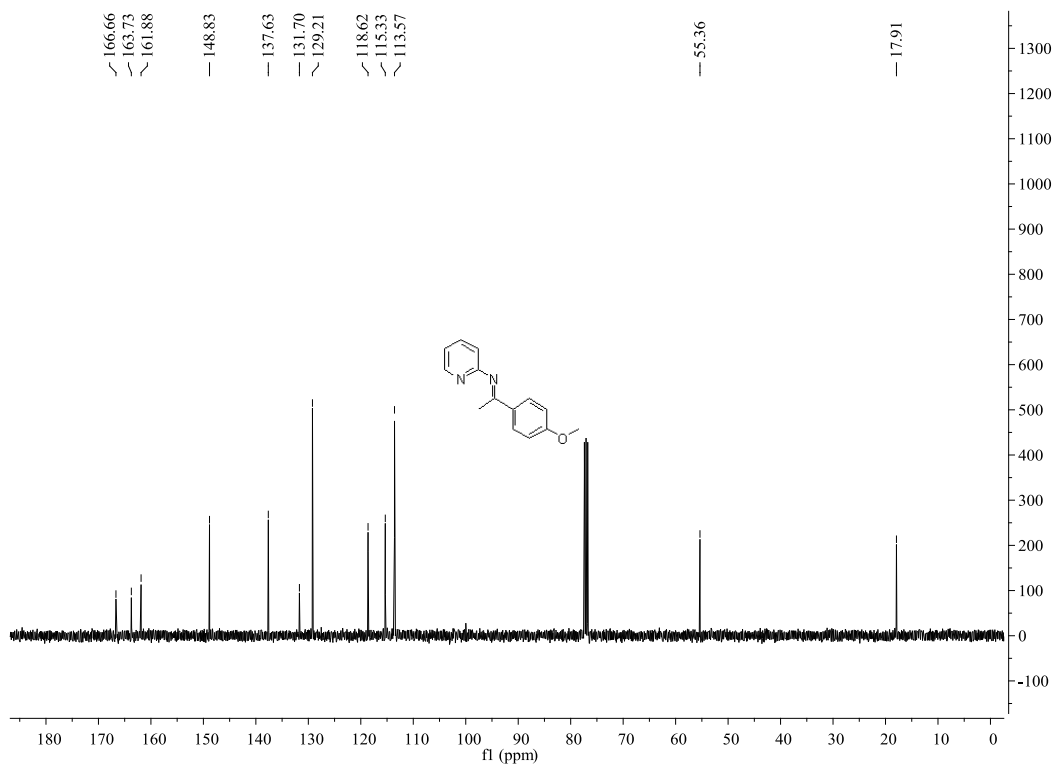

4) *(E)*-*N*-(1-(4-chlorophenyl)ethylidene)pyridin-2-amine (**1e**): (Using CDCl<sub>3</sub> as solvent)

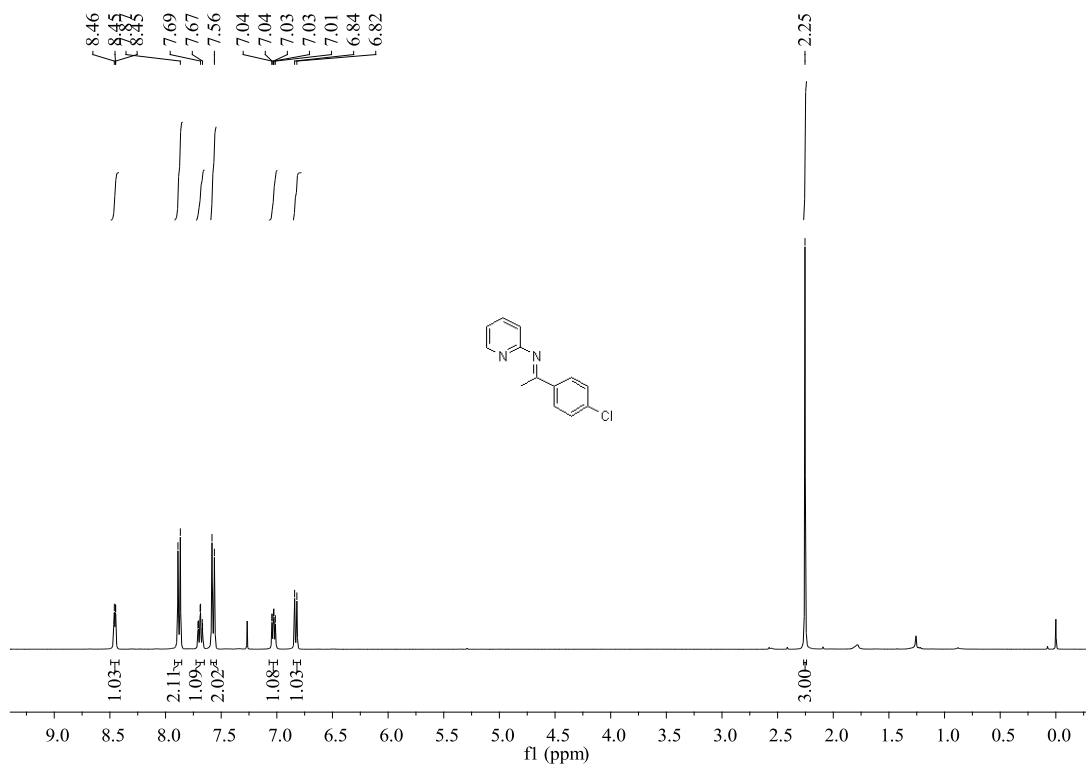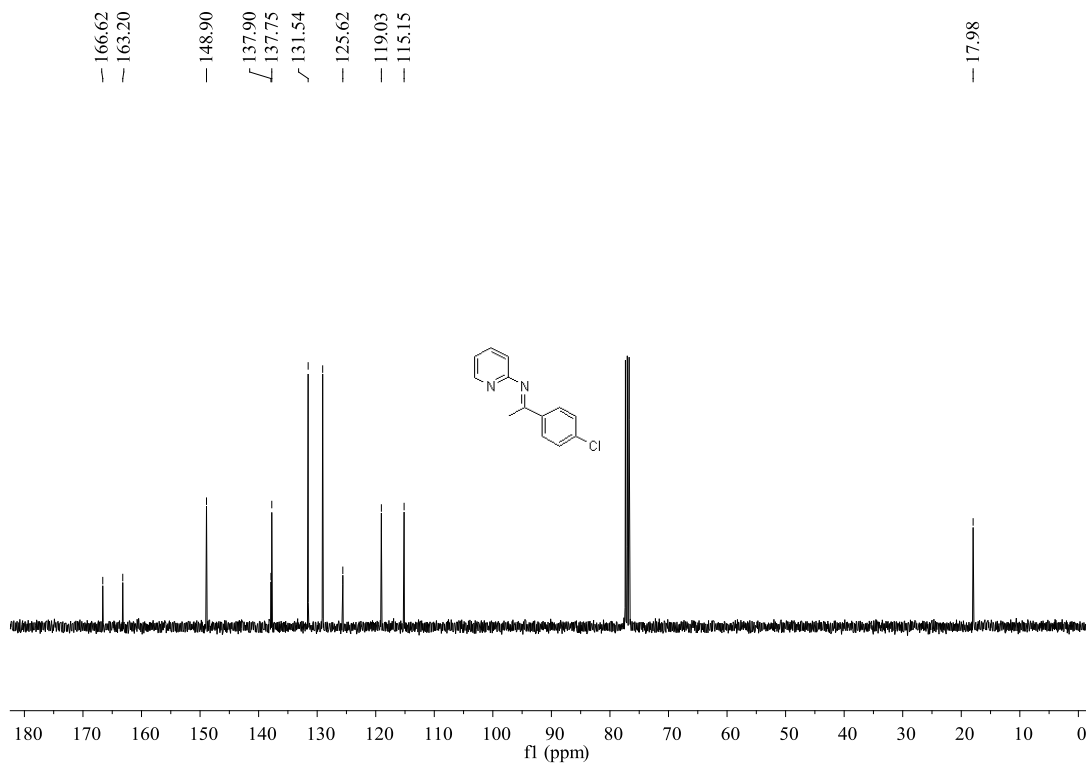



5) (*E*)-*N*-(1-(3-chlorophenyl)ethylidene)pyridin-2-amine (**1f**): (Using CDCl<sub>3</sub> as solvent)

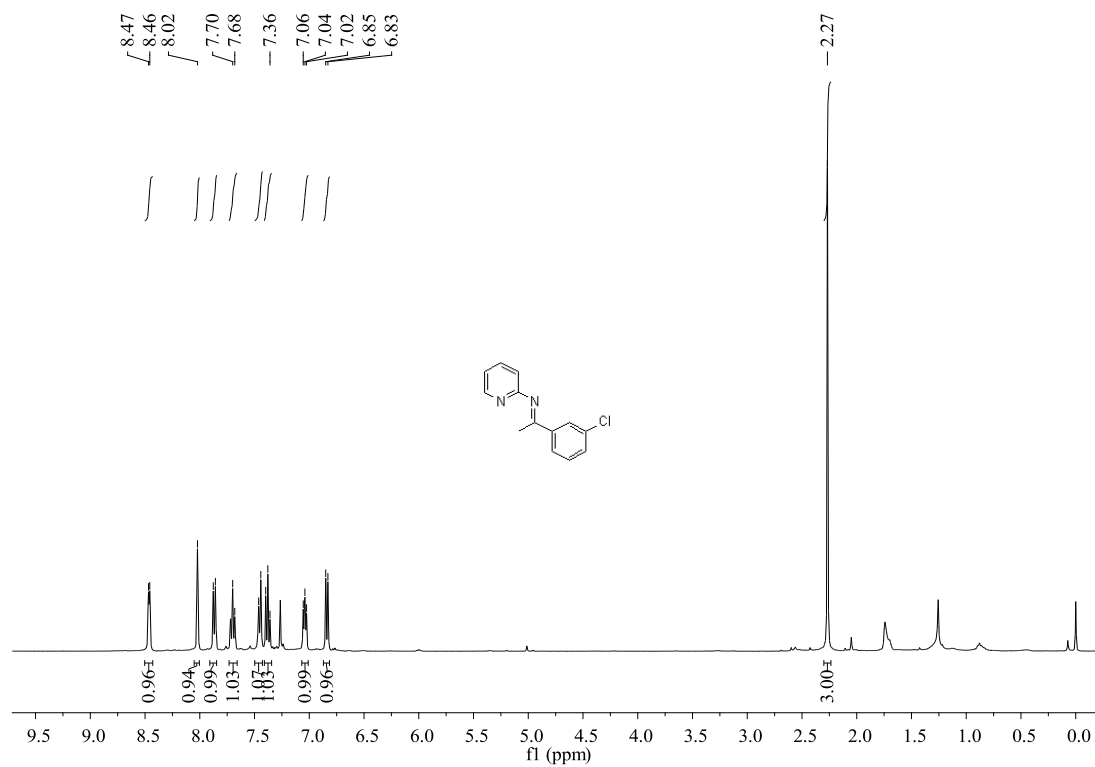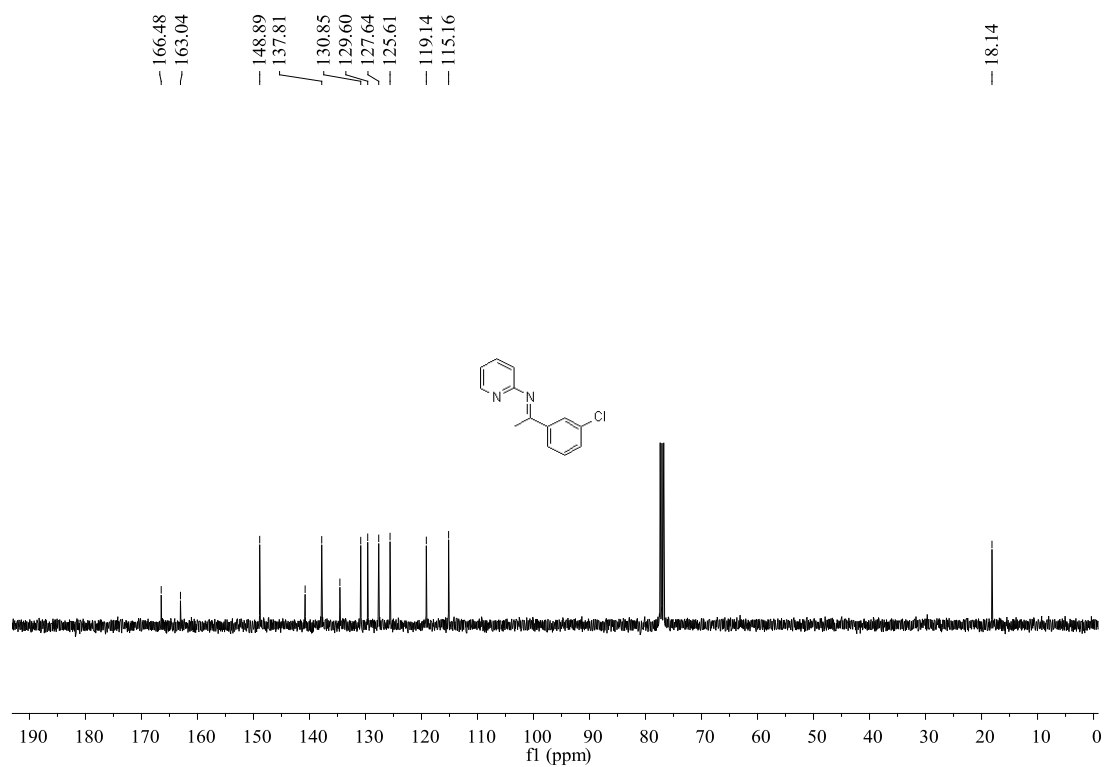

6) (*E*)-*N*-(1-(4-bromophenyl)ethylidene)pyridin-2-amine (**1h**): (Using CDCl<sub>3</sub> as solvent)

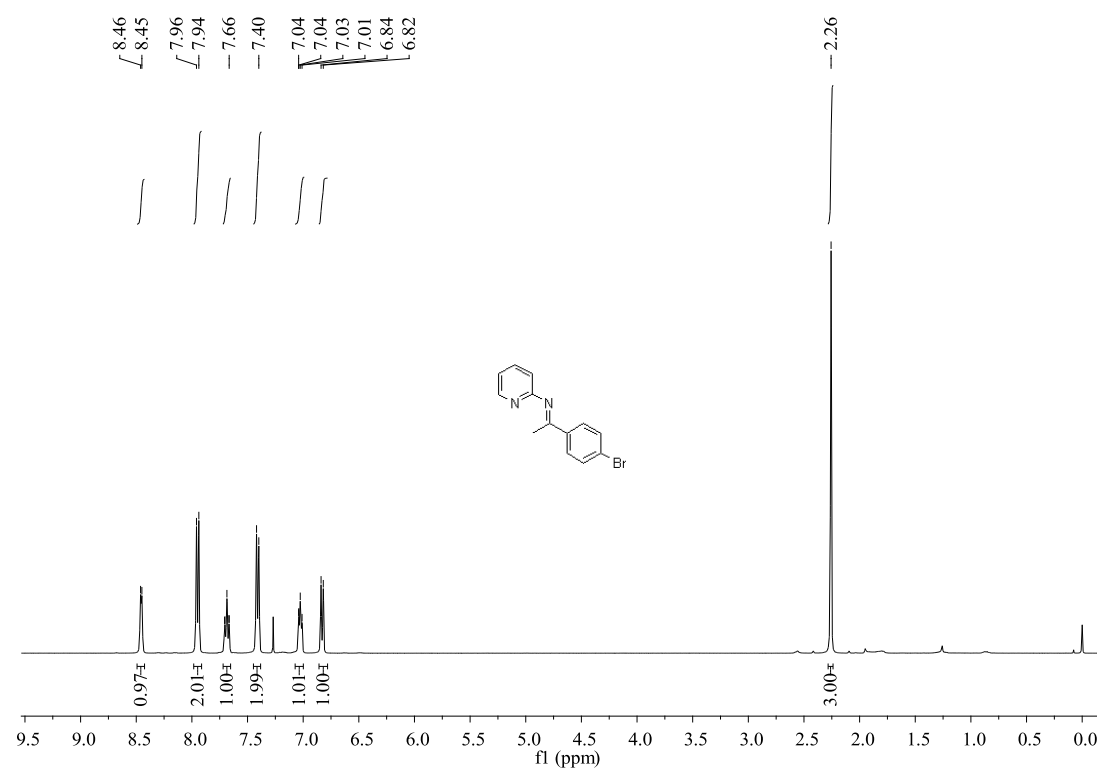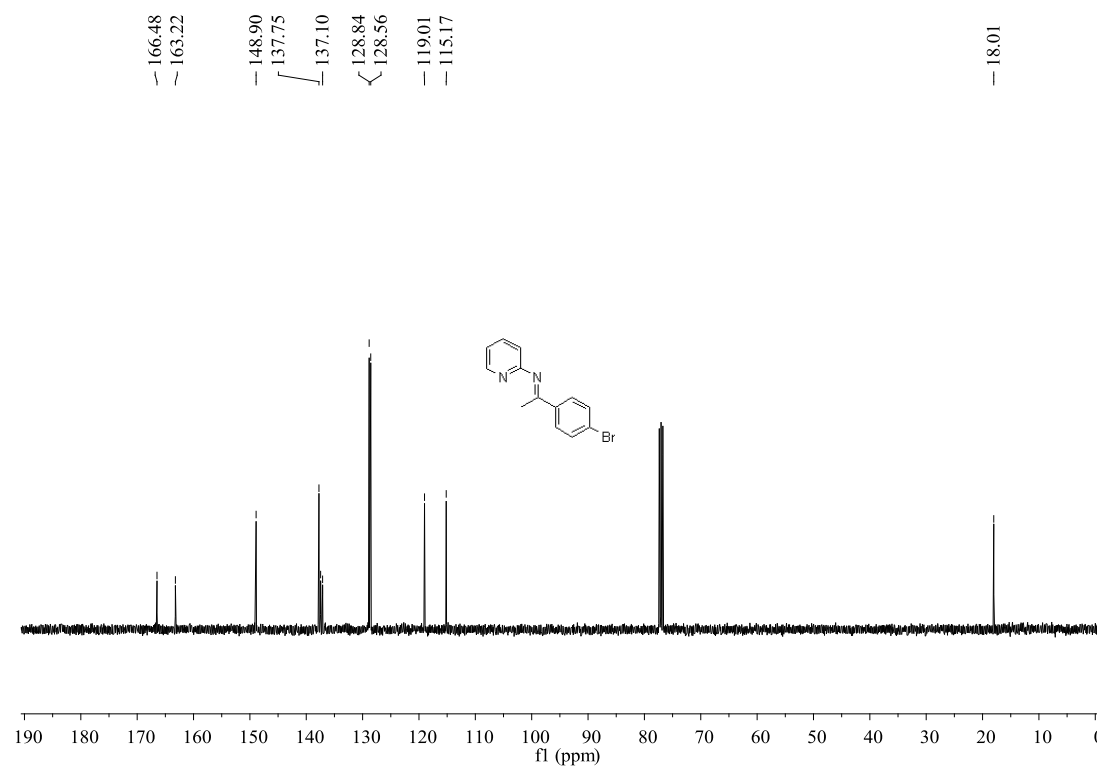

7) *(E)*-*N*-(1-phenylethylidene)aniline (**1t**) (Using CDCl<sub>3</sub> as solvent)

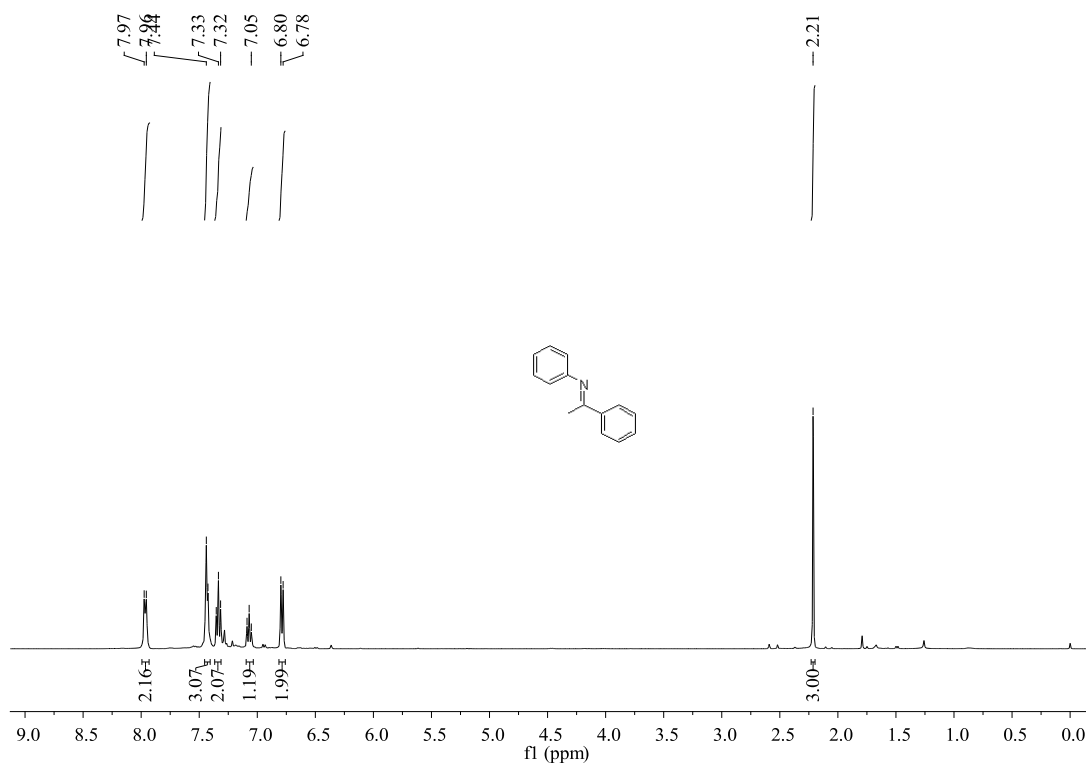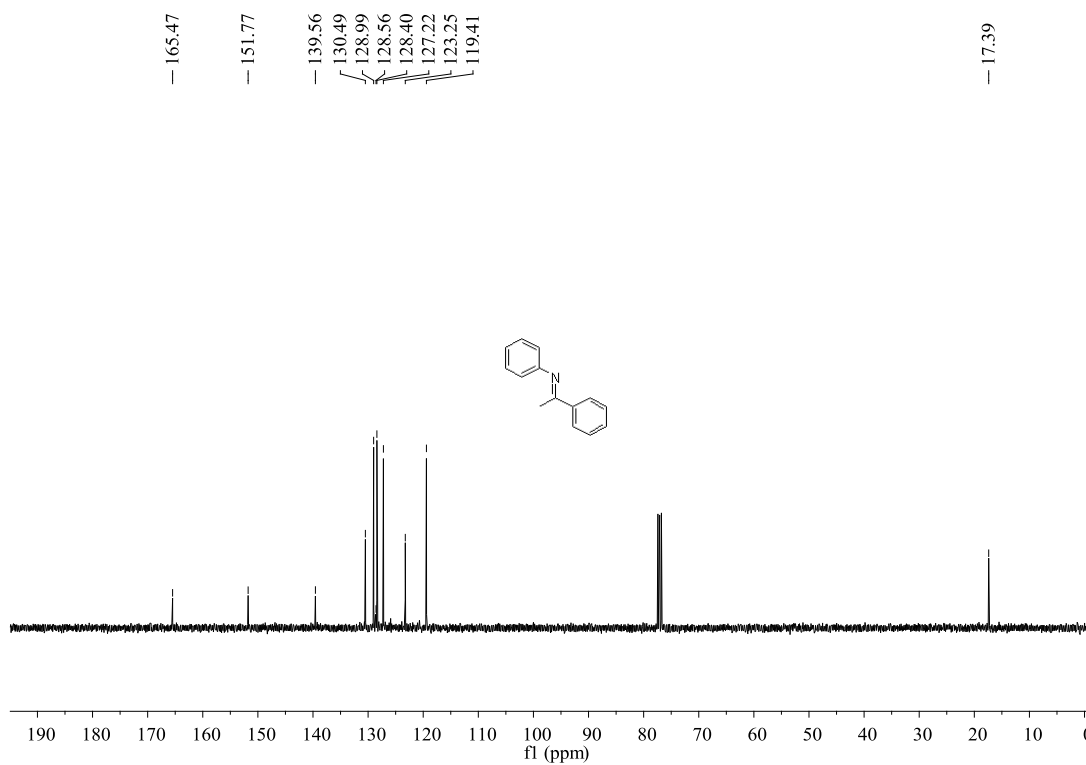

8) 2-(2,3,5-Triphenyl-pyryol-1-yl)-pyridine (**3a**) (Using CDCl<sub>3</sub> as solvent)

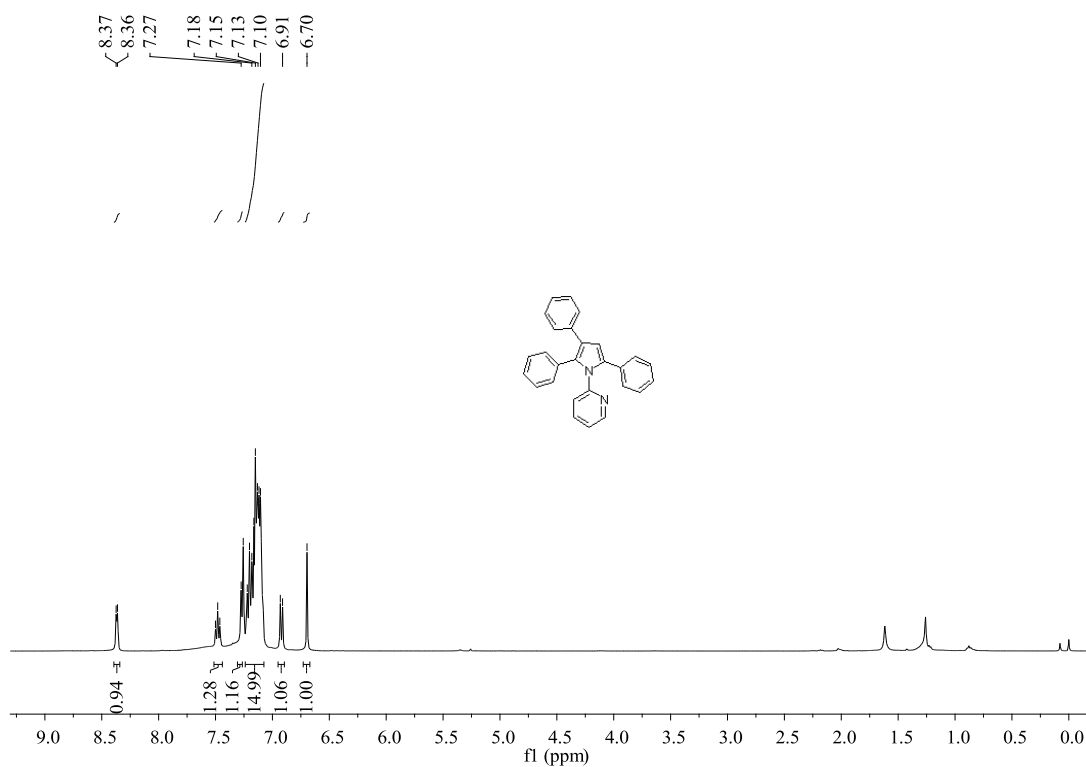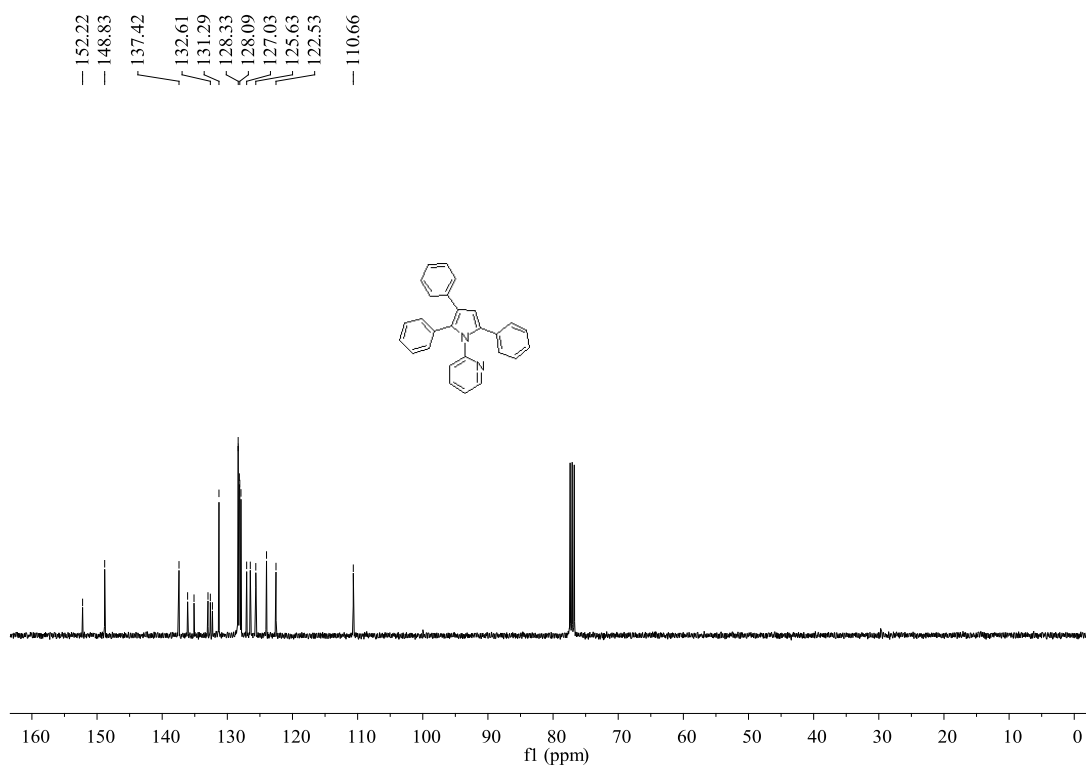

9) 2-(2,3-Diphenyl-5-p-tolyl-pyrrol-1-yl)-pyridine (**3b**) (Using CDCl<sub>3</sub> as solvent)

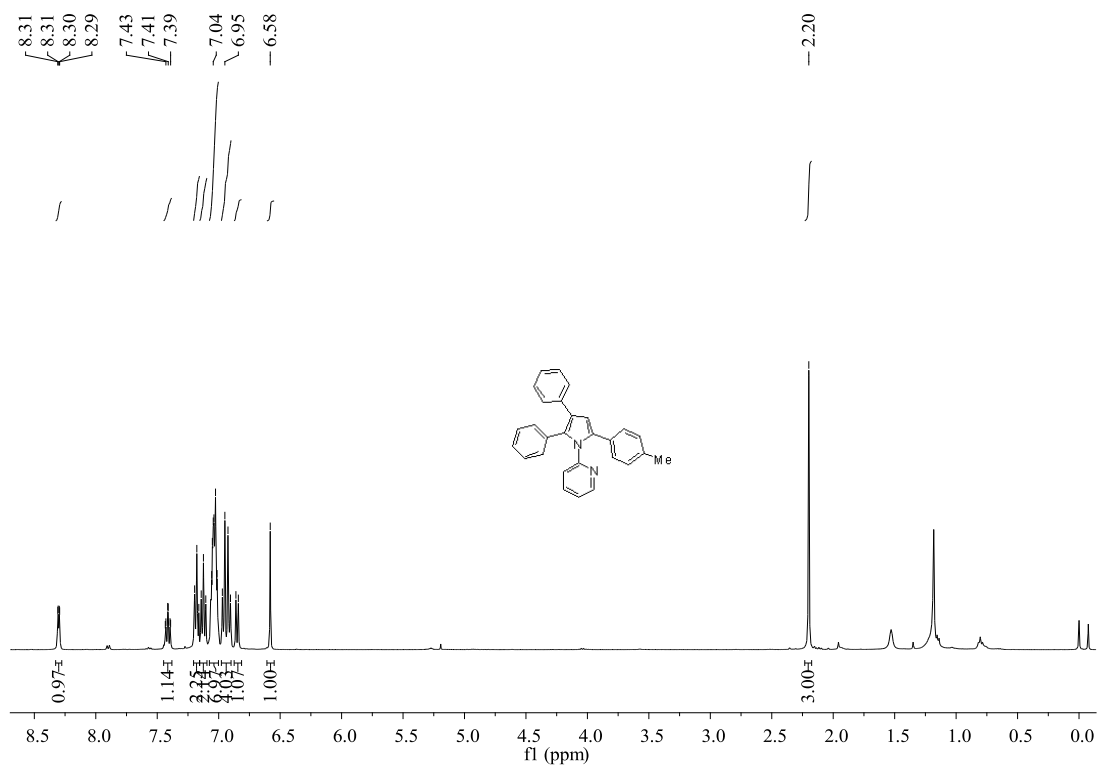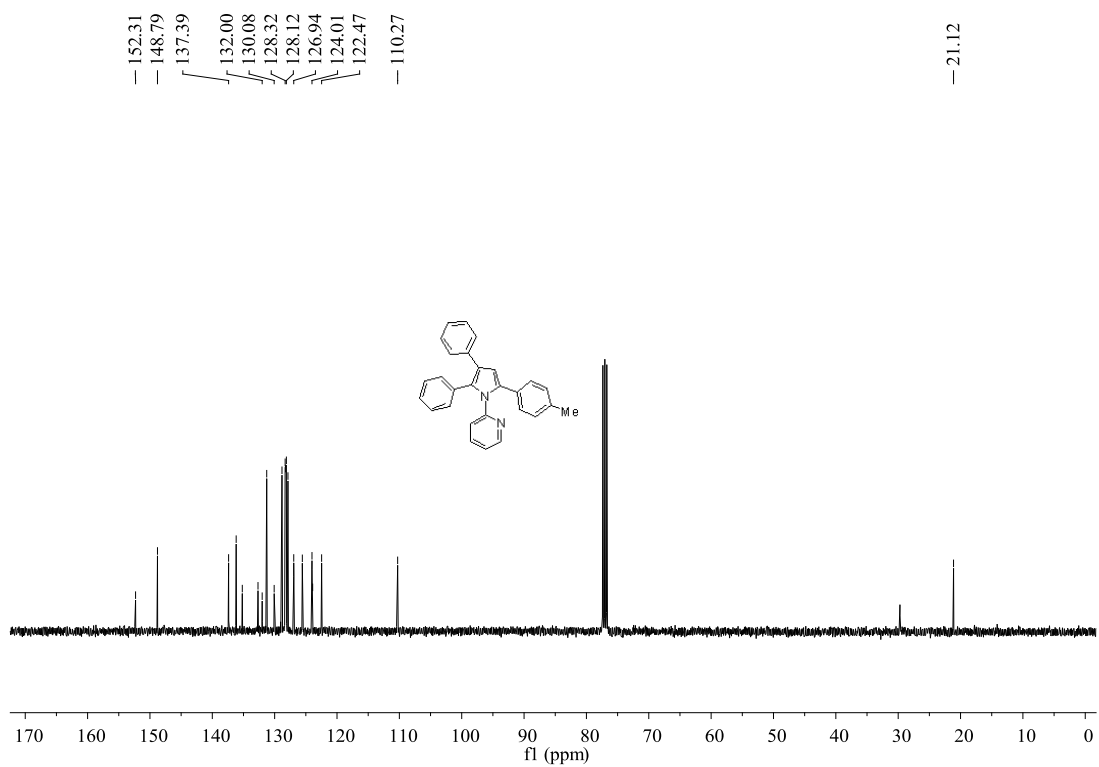

10) 2-[5-(4-Methoxy-phenyl)-2, 3-diphenyl-pyrrol-1-yl]-pyridine (**3c**) (Using CDCl<sub>3</sub> as solvent)

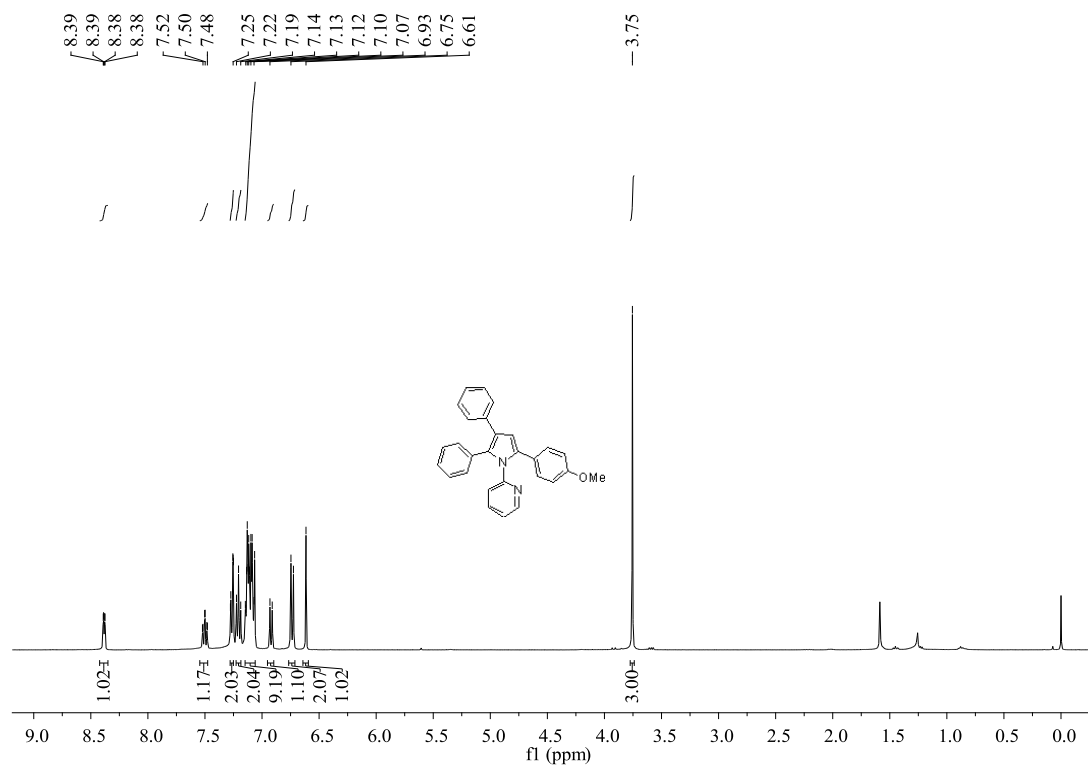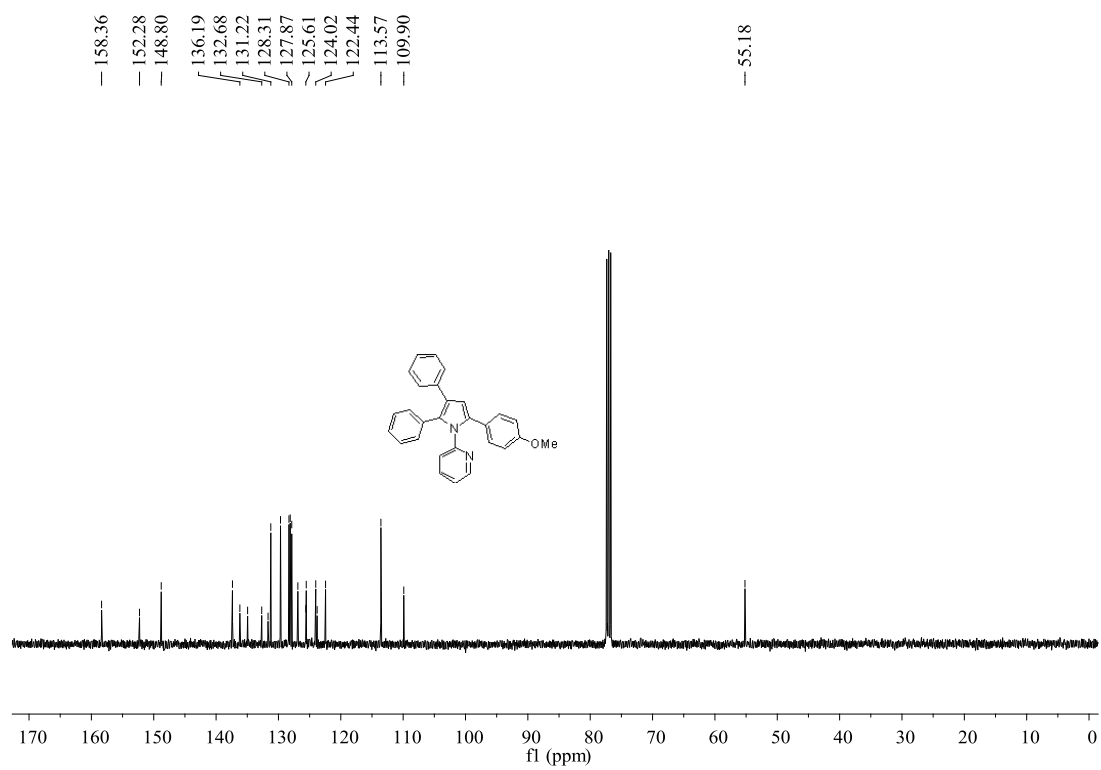

11) 2-(4, 5-Diphenyl-1-pyridin-2-yl-1*H*-pyrrol-2-yl)-phenol (**3d**) (Using CDCl<sub>3</sub> as solvent)

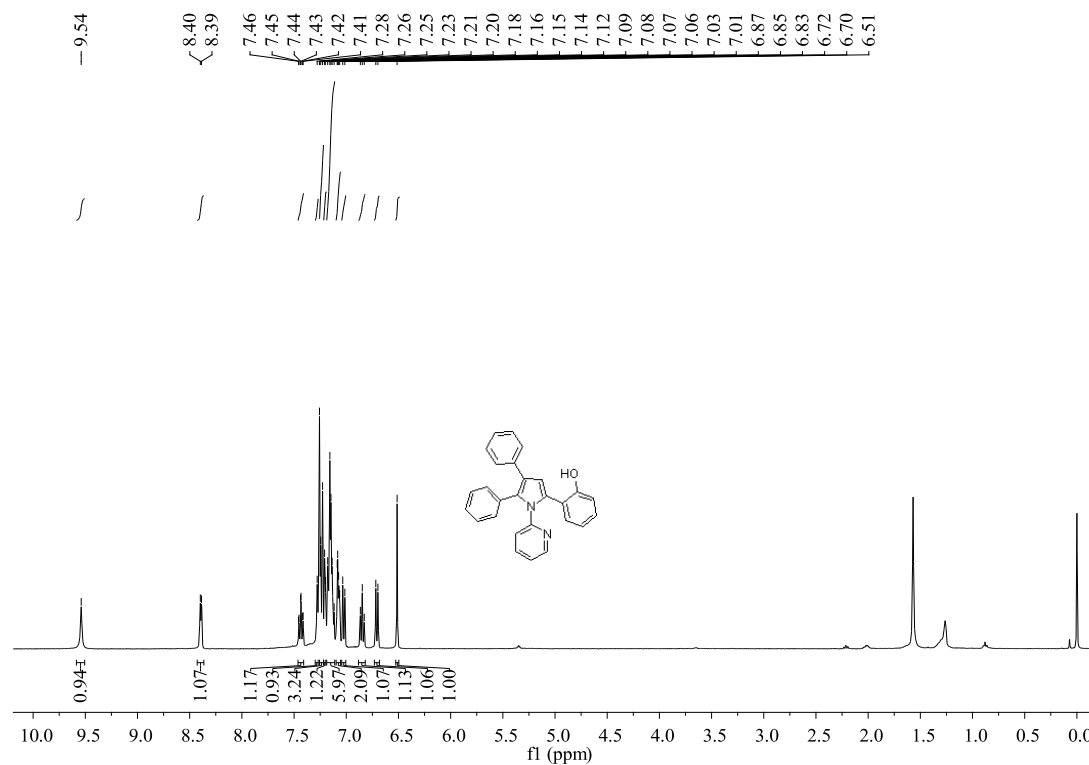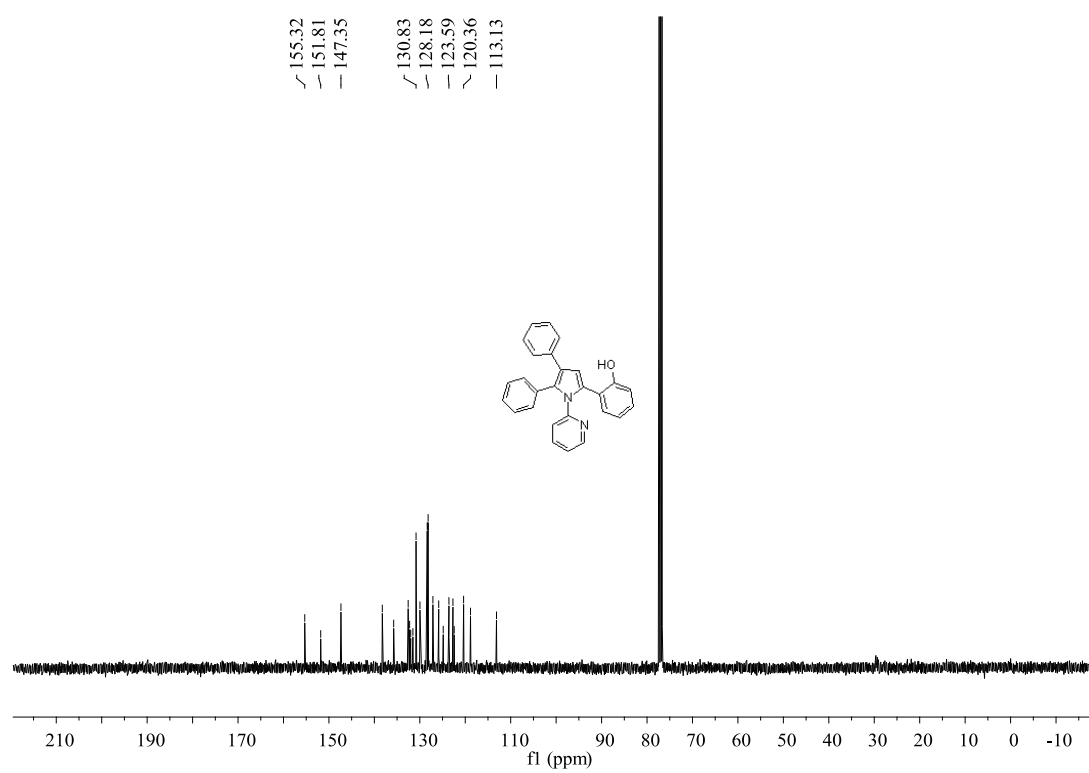

12) 2-[5-(4-Chloro-phenyl)-2,3-diphenyl-2,3-diphenyl-pyrrol-1-yl]-pyridine (**3e**) (Using CDCl<sub>3</sub> as solvent)

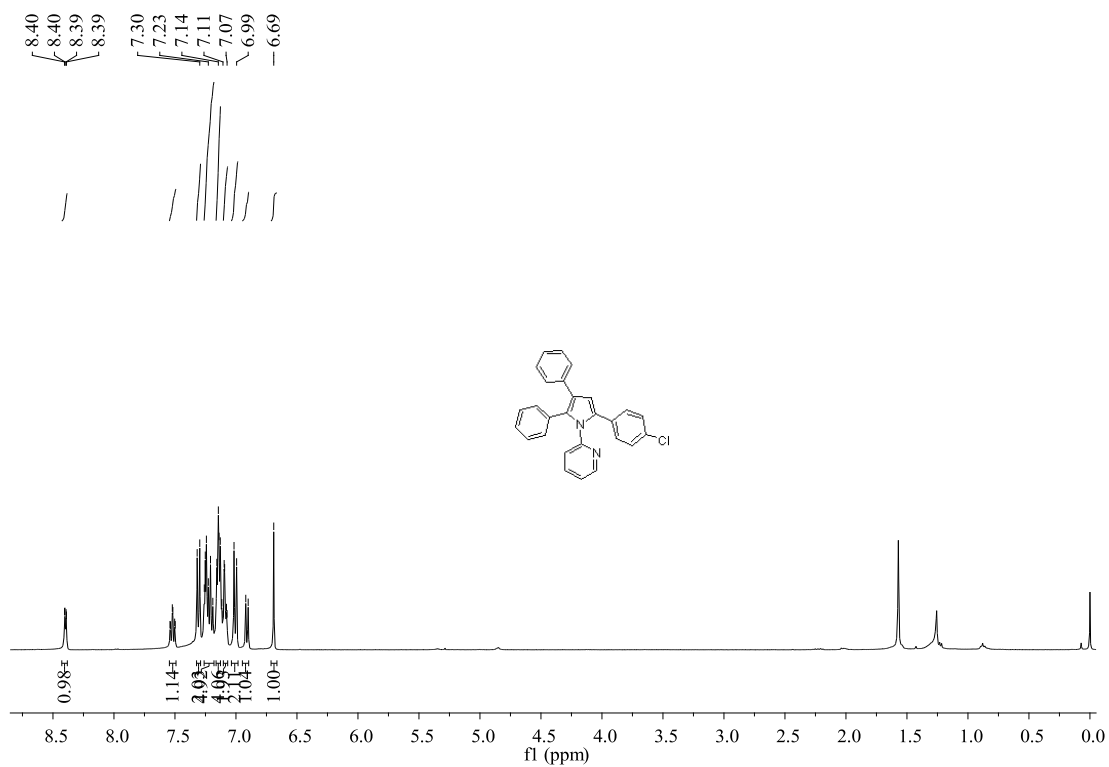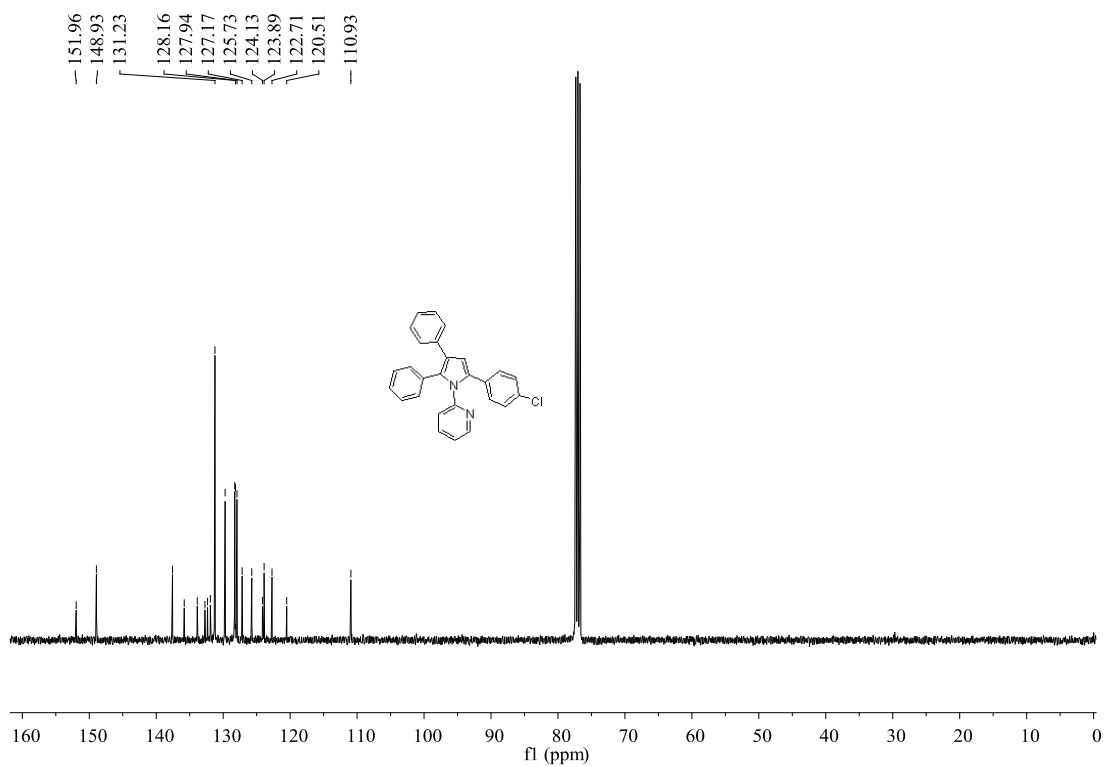



13) 2-[5-(3-Chloro-phenyl)-2, 3-diphenyl-pyrrol-1-yl]-pyridine (**3f**) (Using CDCl<sub>3</sub> as solvent)

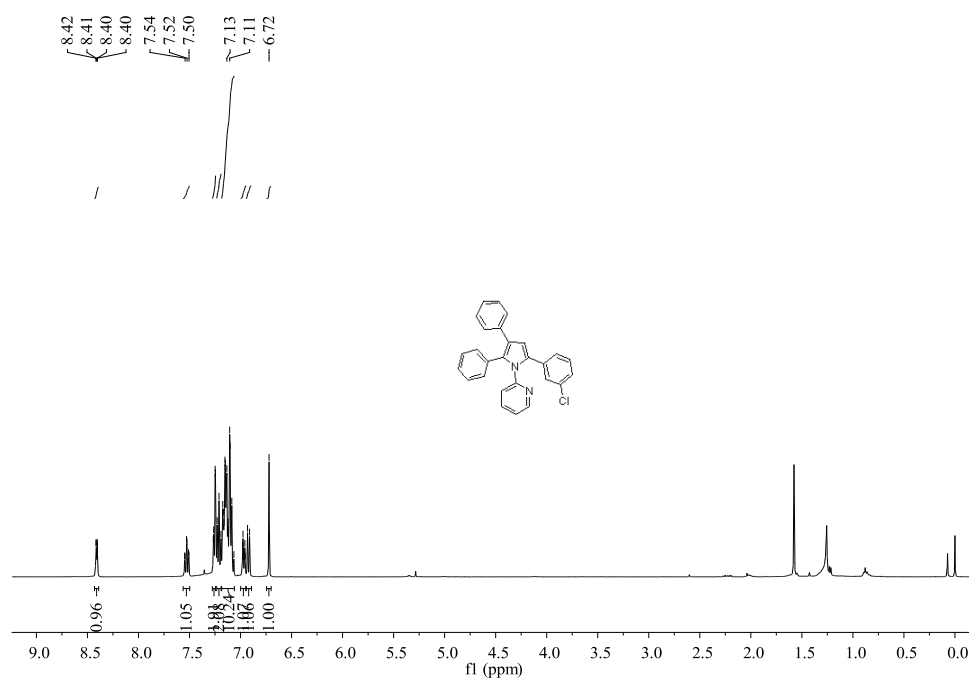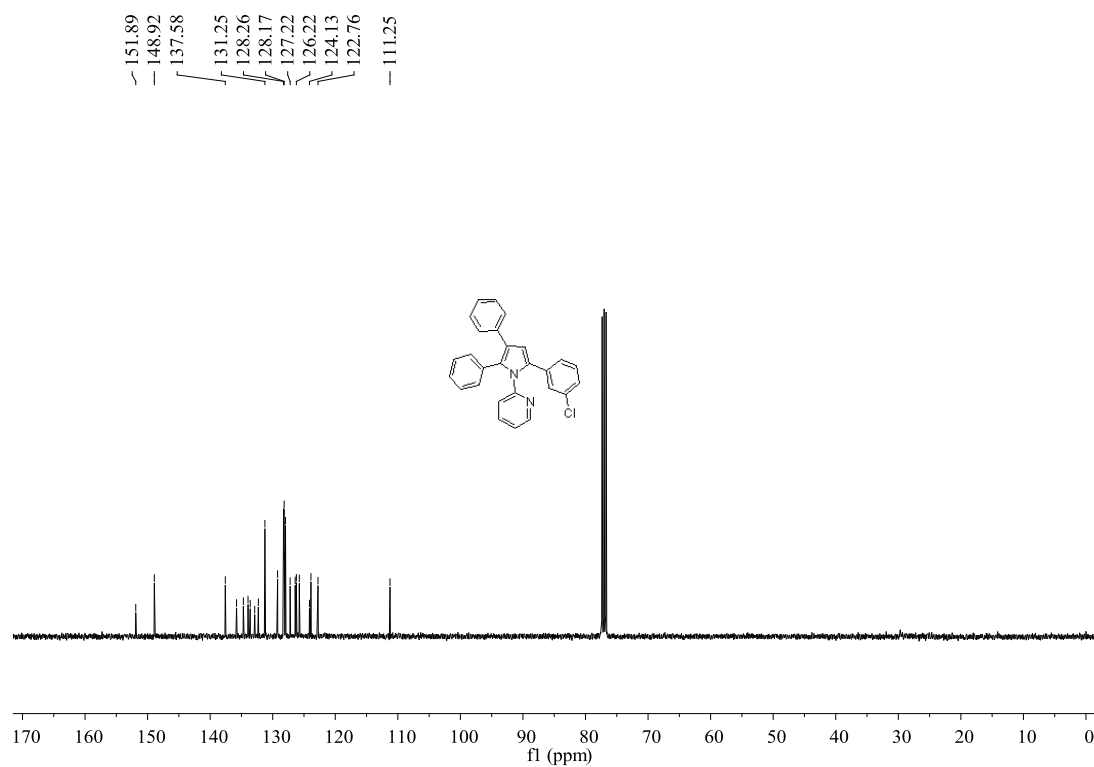

14) 2-[5-(2-Chloro-phenyl)-2, 3-diphenyl-pyrrol-1-yl]-pyridine (**3g**) (Using CDCl<sub>3</sub> as solvent)

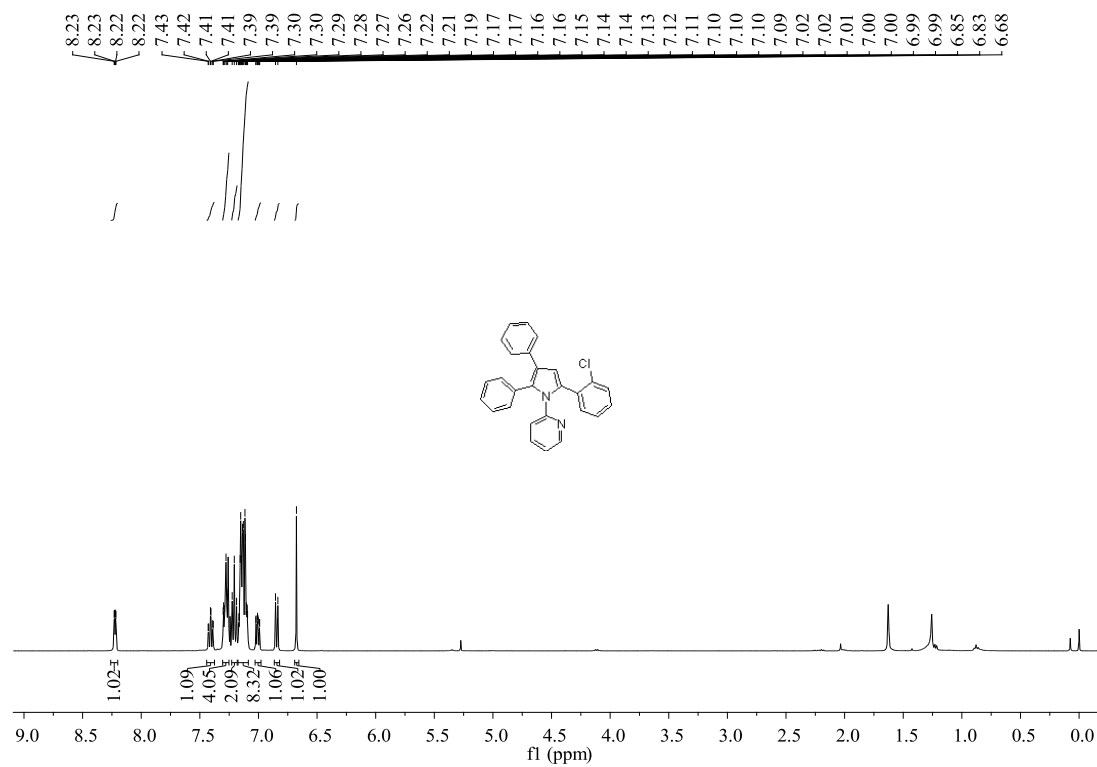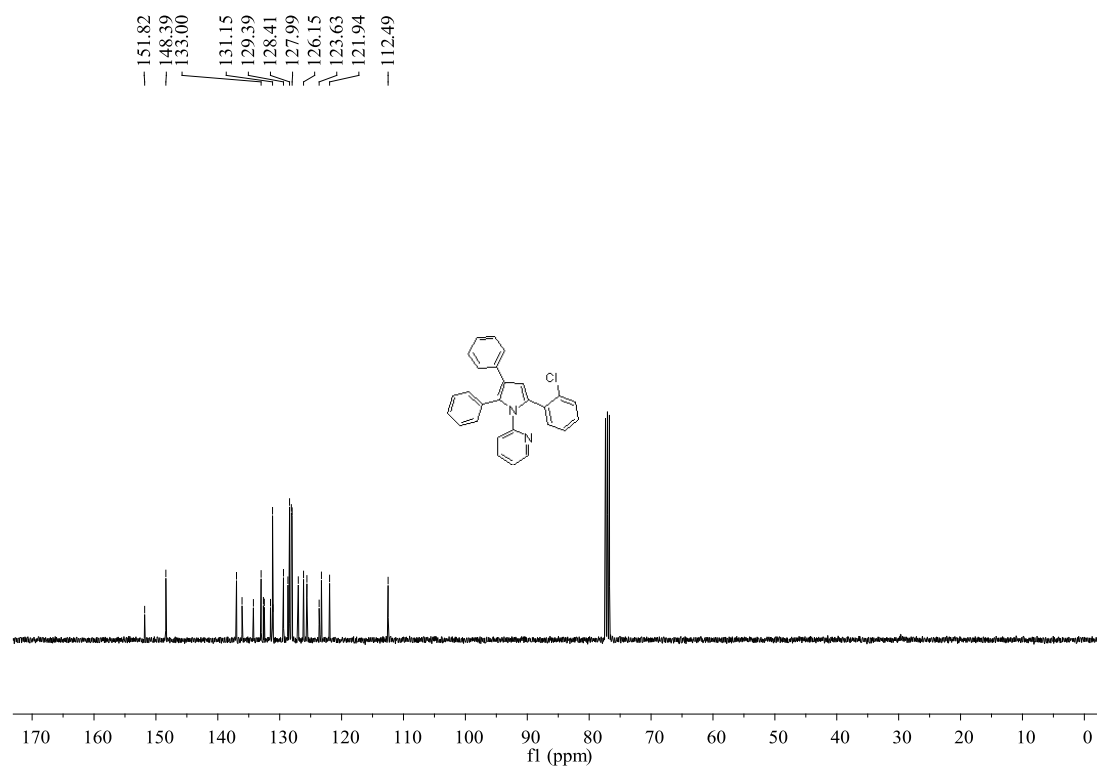

15) 2-[5-(2-Bromo-phenyl)-2, 3-diphenyl-pyrrol-1-yl]-pyridine (**3h**) (Using CDCl<sub>3</sub> as solvent)

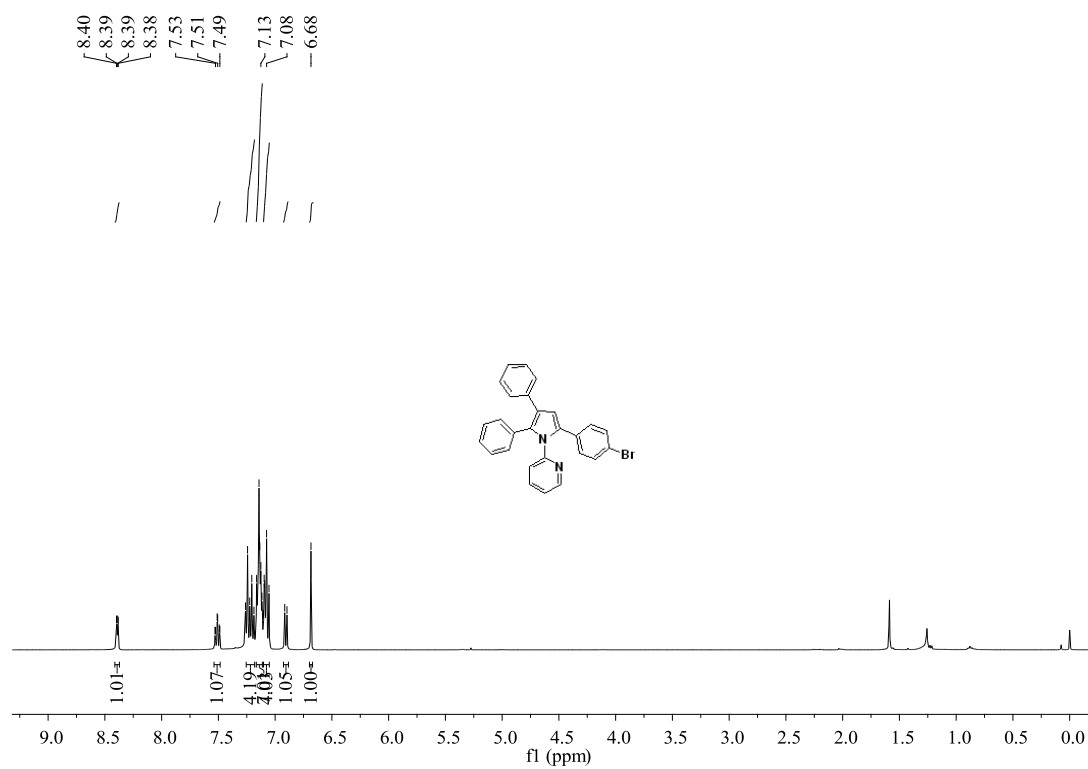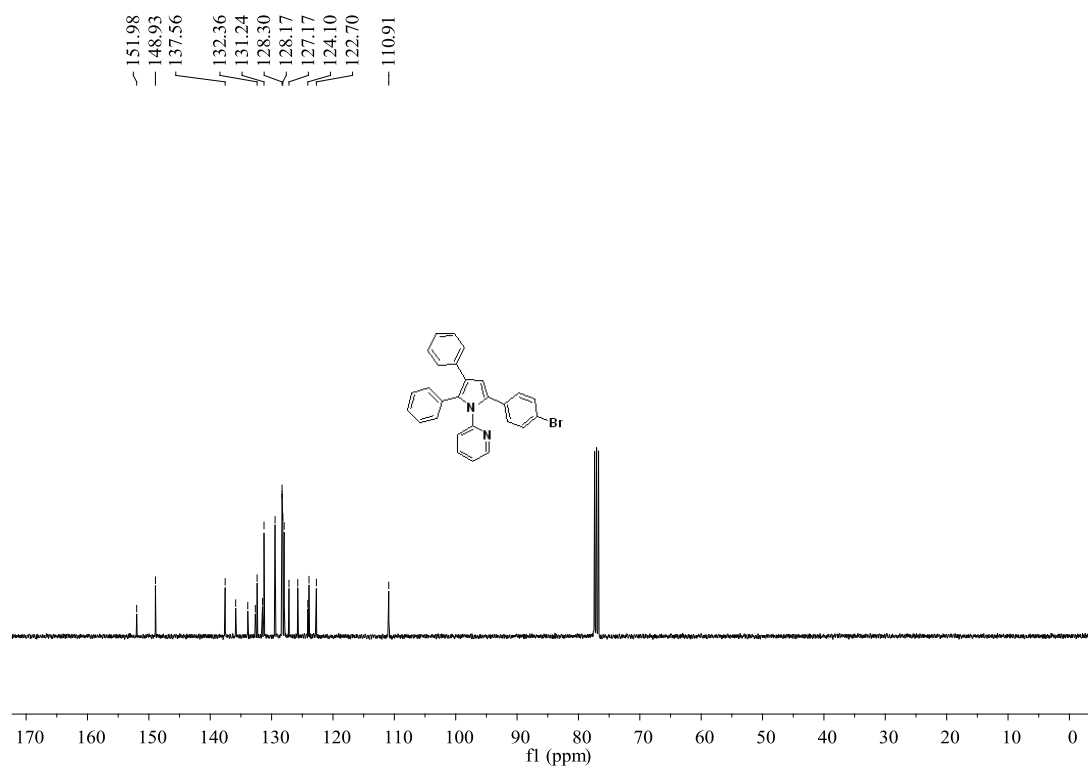

16) 4-(4, 5-Diphenyl-1-pyridin-2-yl-1H-pyrrol-2-yl)-benzoic acid methyl ester (**3i**) (Using CDCl<sub>3</sub> as solvent)

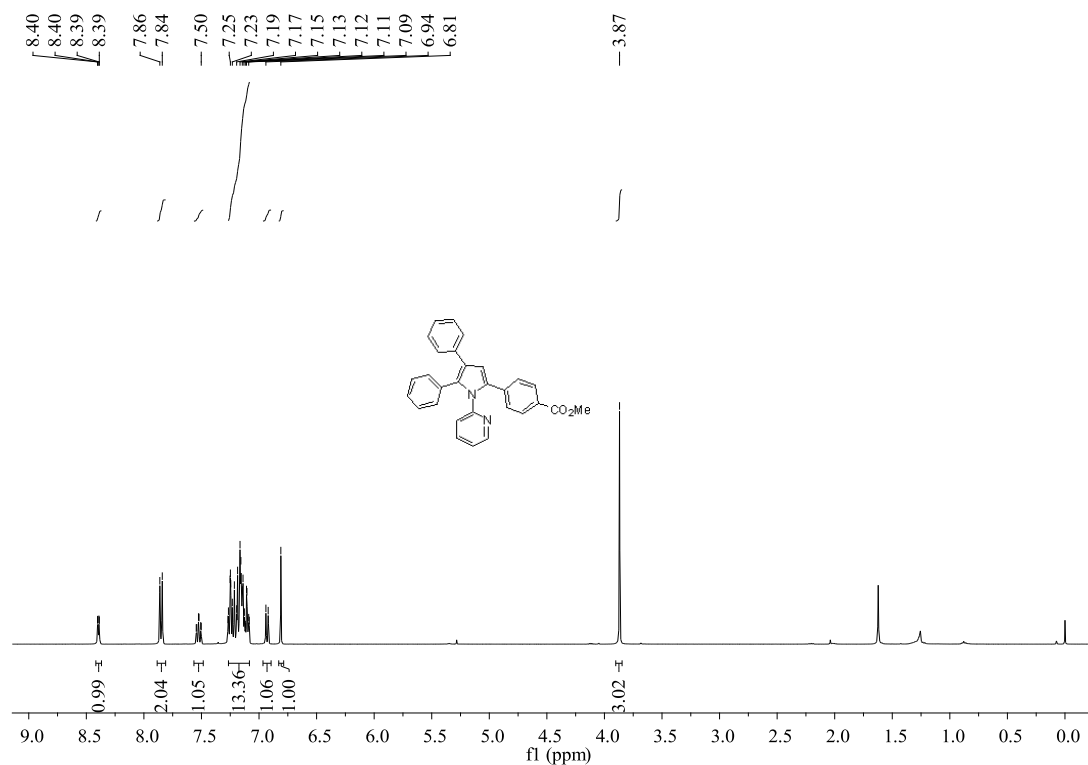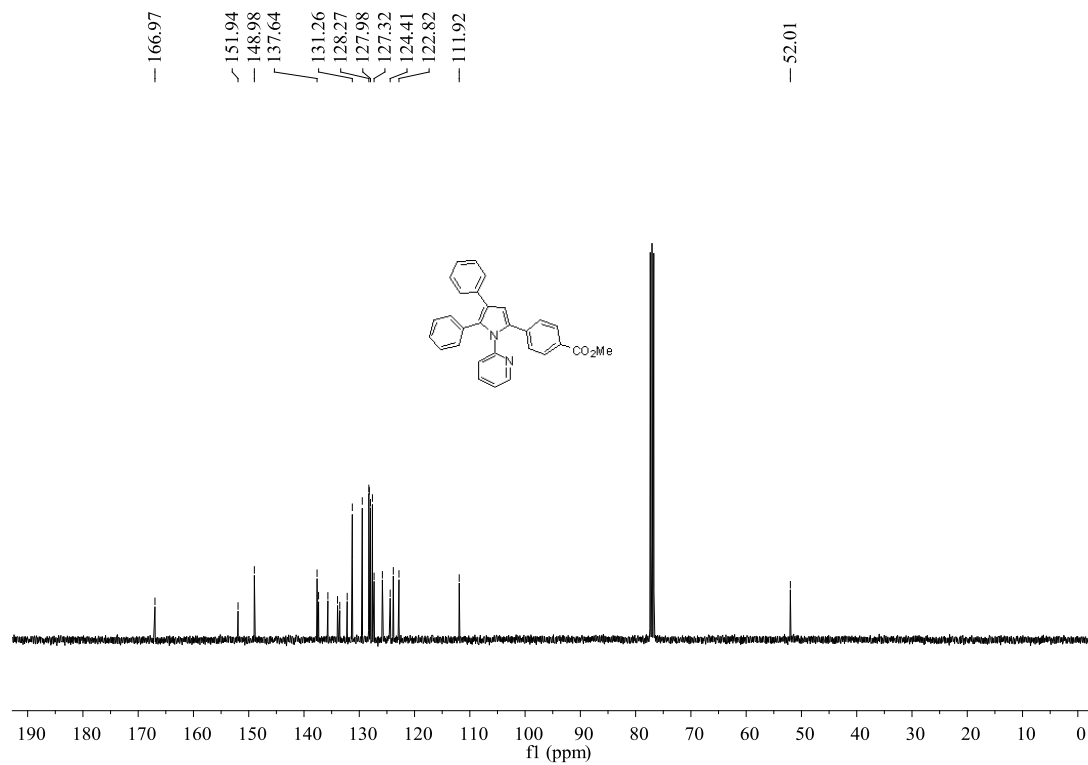

17) 2-[5-(4-Nitro-phenyl)-2, 3-diphenyl-pyrrol-1-yl]-pyridine (**3j**) (Using CDCl<sub>3</sub> as solvent)

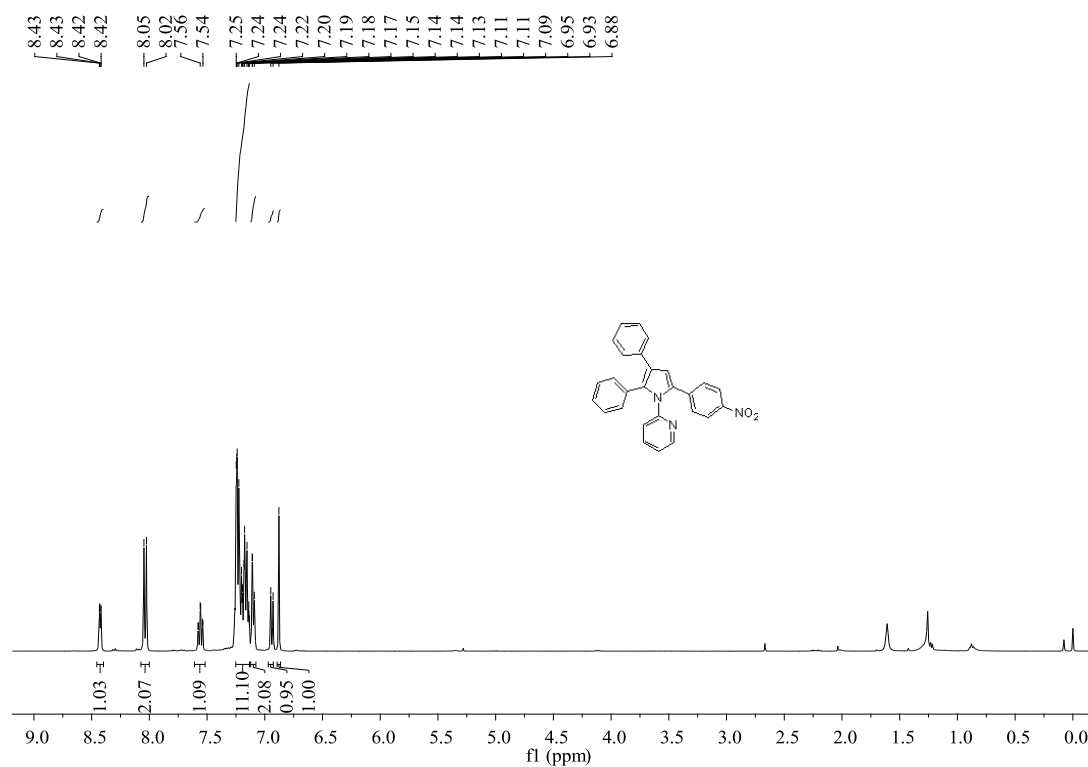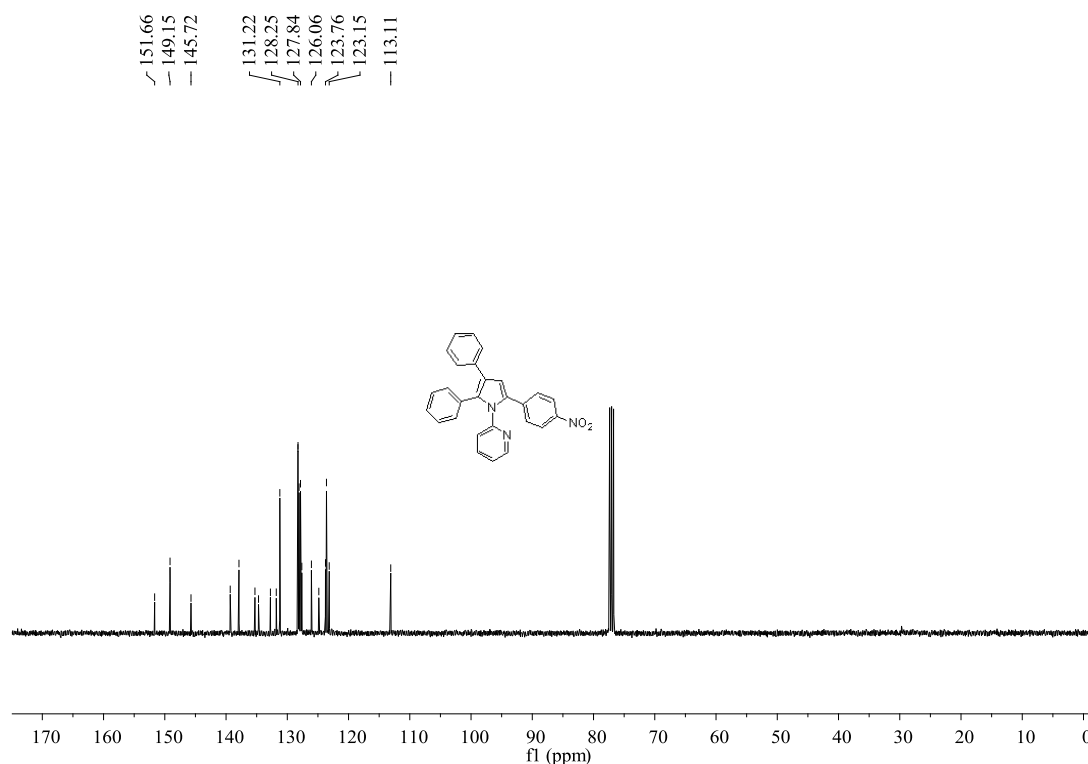

18) 2-(5-Benzo [1, 3] dioxol-5-yl-2,3-diphenyl-pyrrol-1-yl)-pyridine (**3k**) (Using CDCl<sub>3</sub> as solvent)

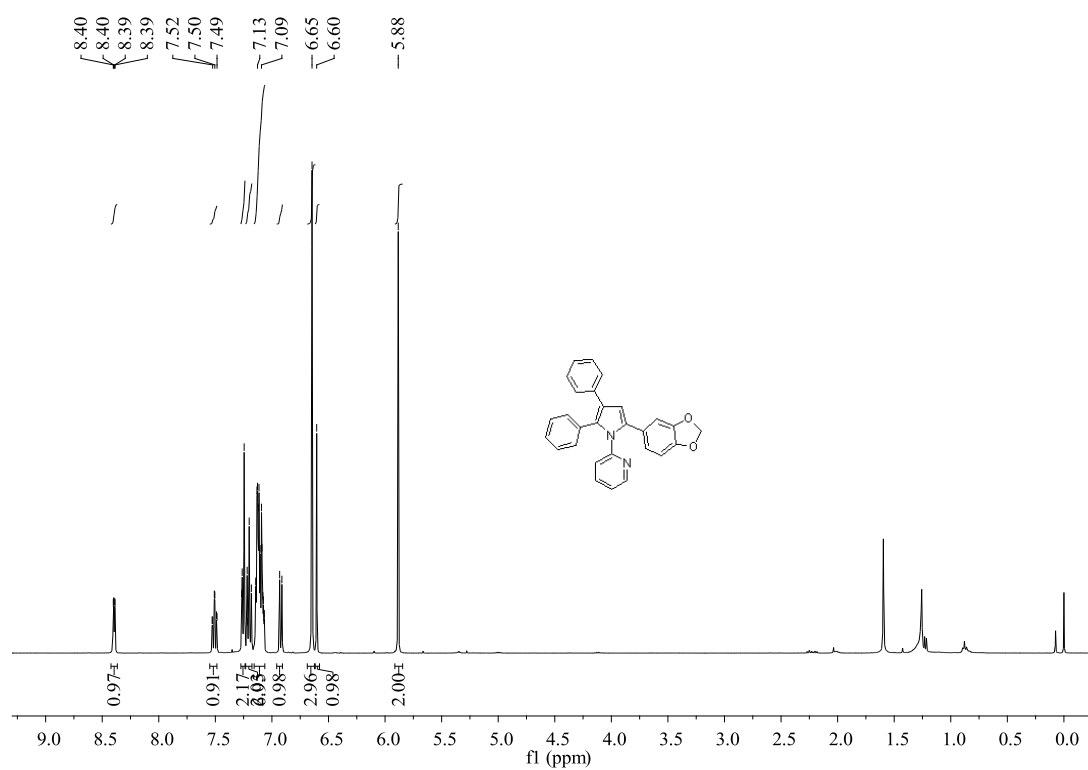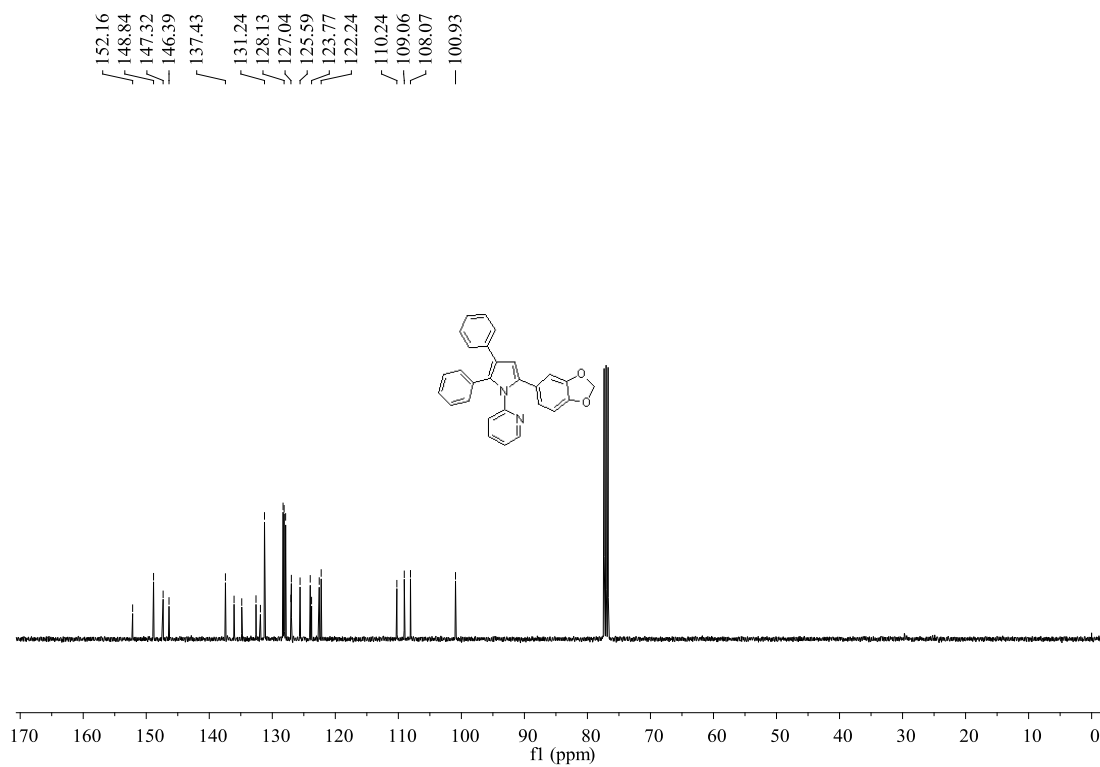

19) 2-(3-Methyl-2, 4, 5-triphenyl-pyrrol-1-yl)-pyridine (**31**) (Using CDCl<sub>3</sub> as solvent)

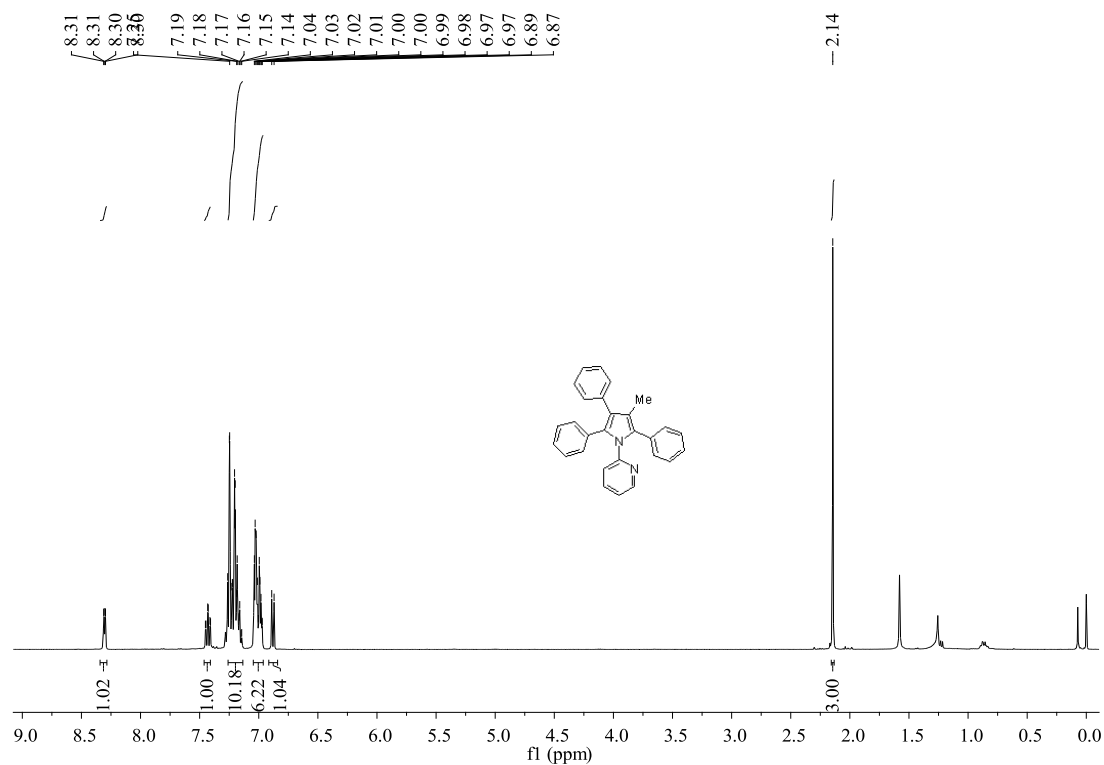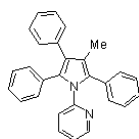

152.45  
148.58  
132.85  
131.64  
130.52  
127.50  
125.76  
121.98  
117.41

10.82

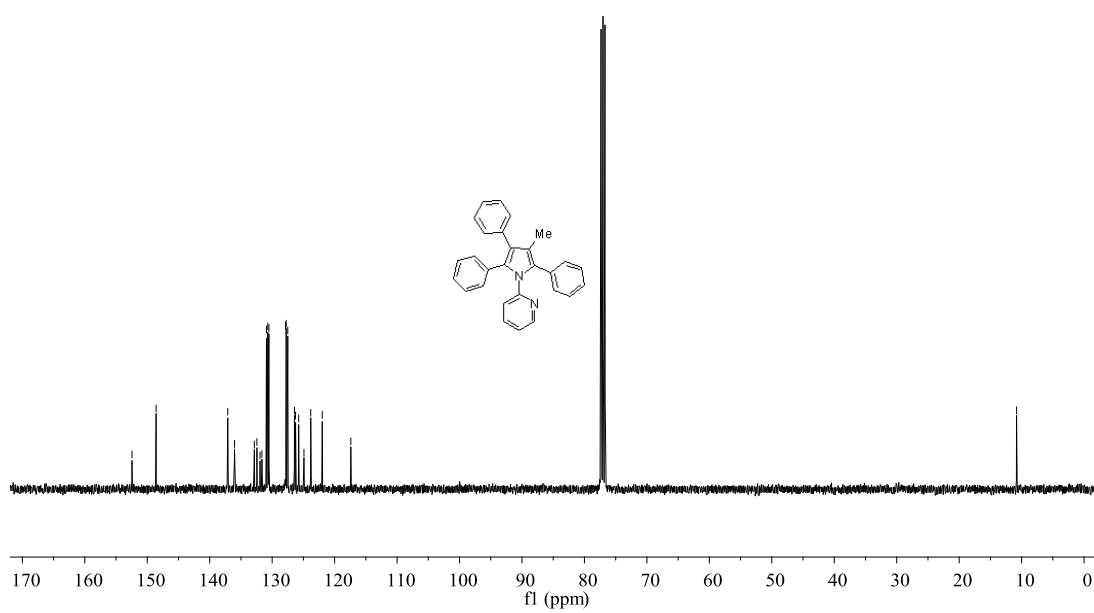

20) 2-(5-Furan-2-yl-2, 3-diphenyl-pyrrol-1-yl)-pyridine (**3m**) (Using CDCl<sub>3</sub> as solvent)

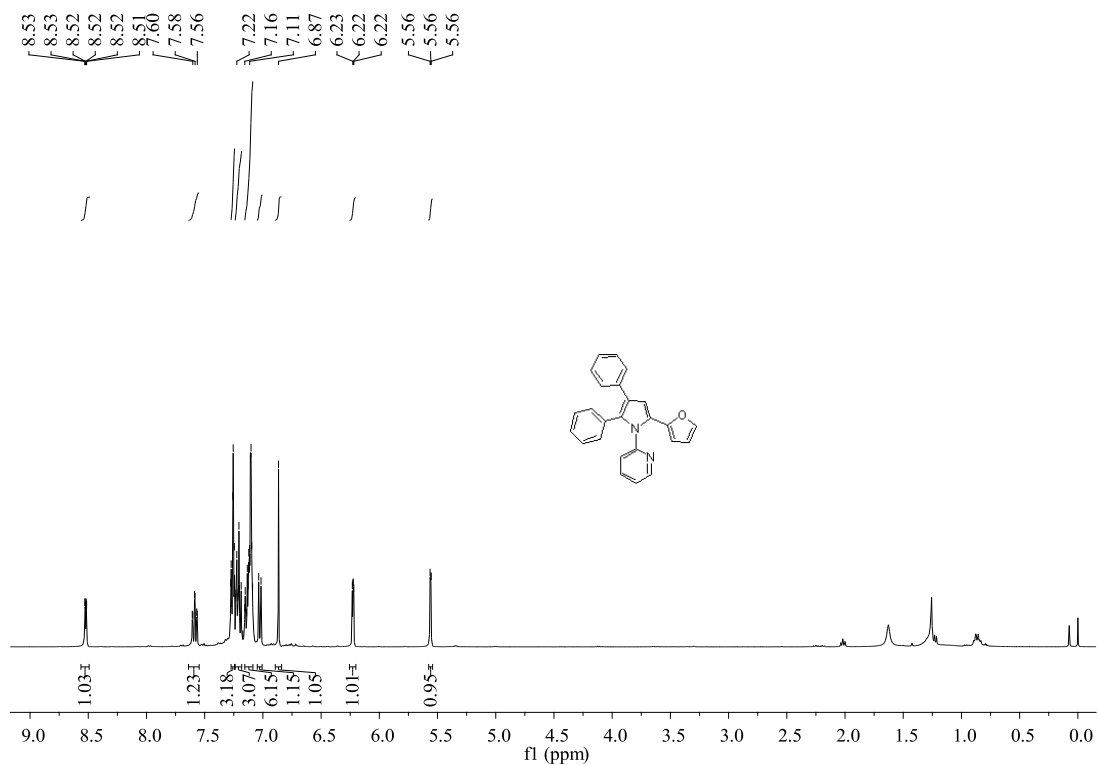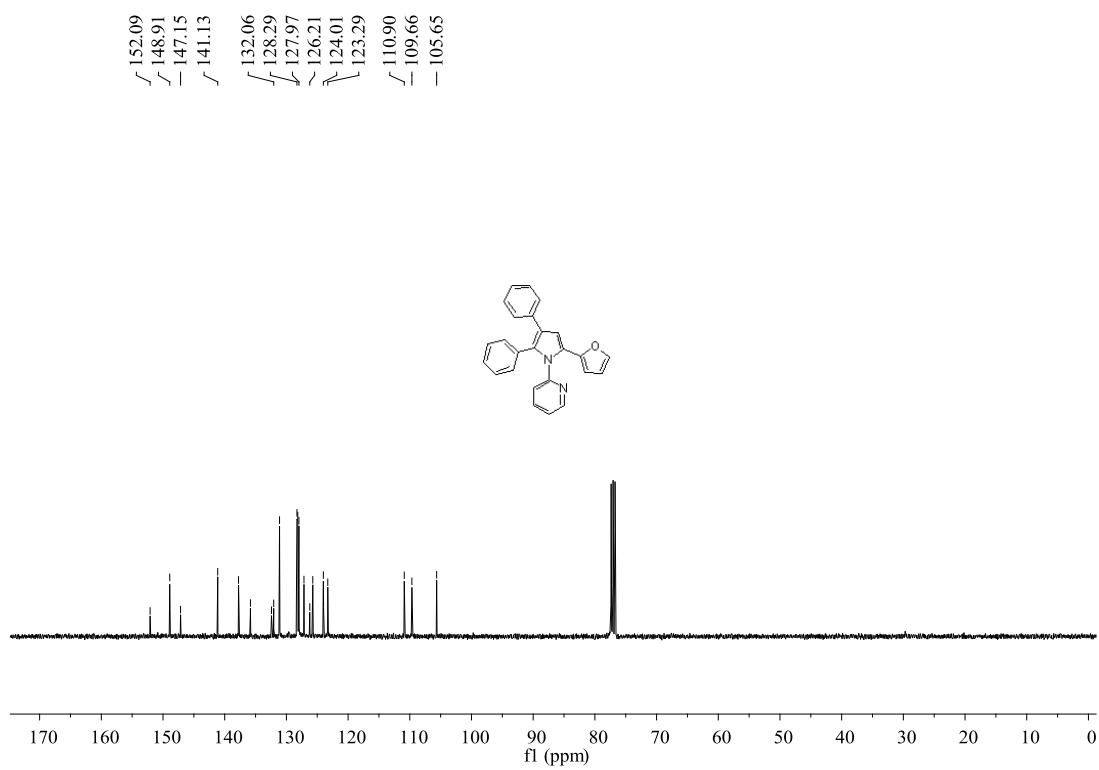



21) 2-(2, 3-Diphenyl-5-thiophen-2-yl-pyrrol-1-yl)-pyridine (**3n**) (Using CDCl<sub>3</sub> as solvent)

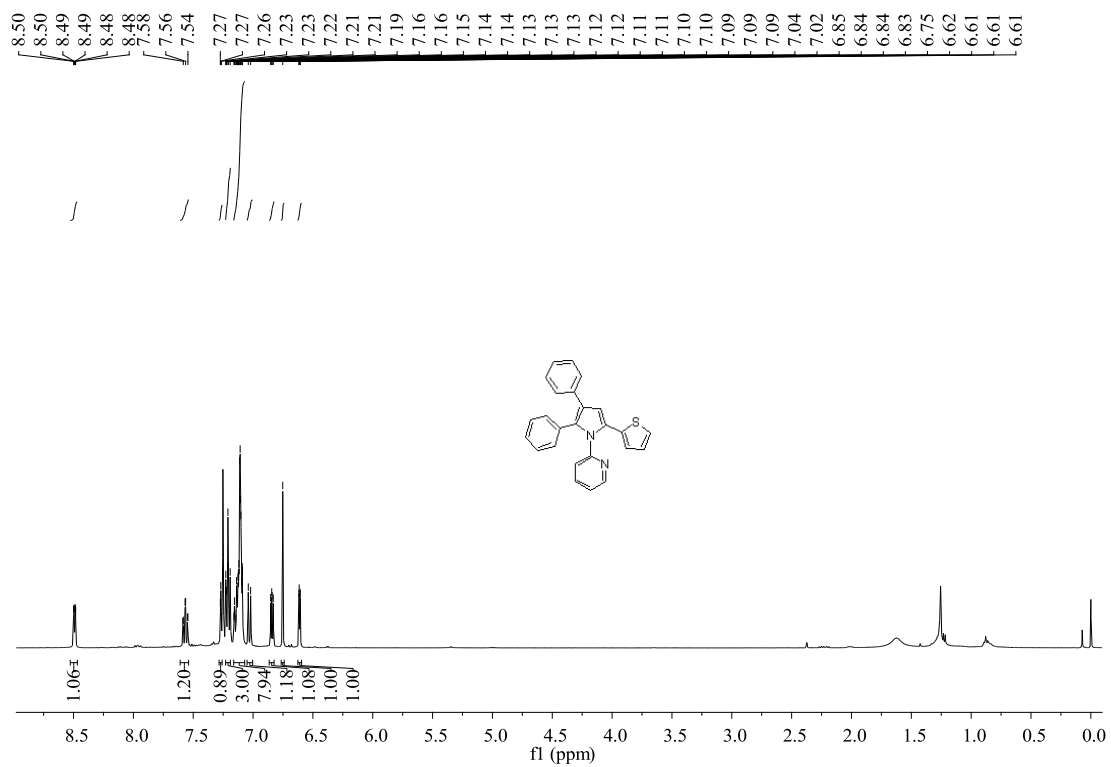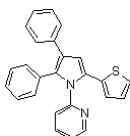

151.83  
148.95  
137.67  
132.20  
128.52  
128.16  
127.10  
125.72  
124.42  
123.25  
110.96

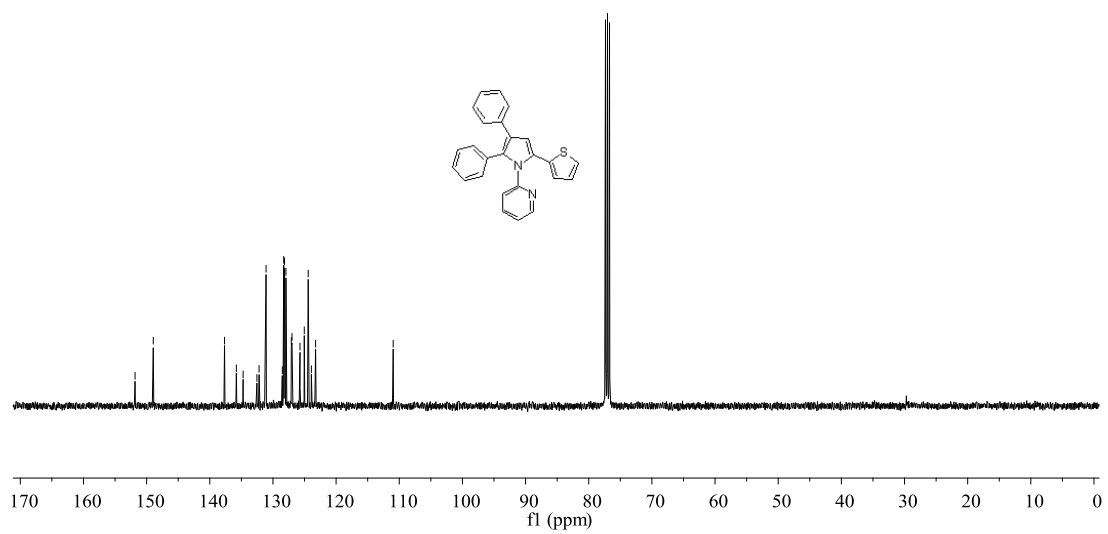

22) 5-Methyl-2-(2, 3, 5-triphenyl-pyrrol-1-yl)-pyridine (**30**) (Using CDCl<sub>3</sub> as solvent)

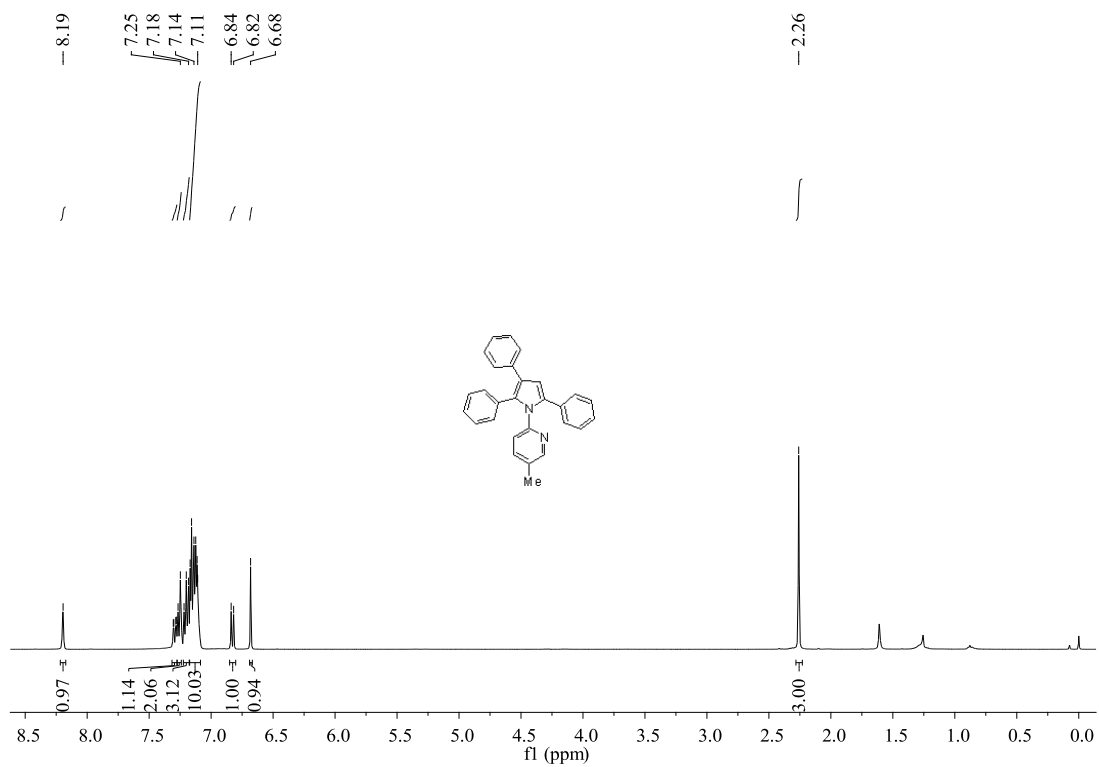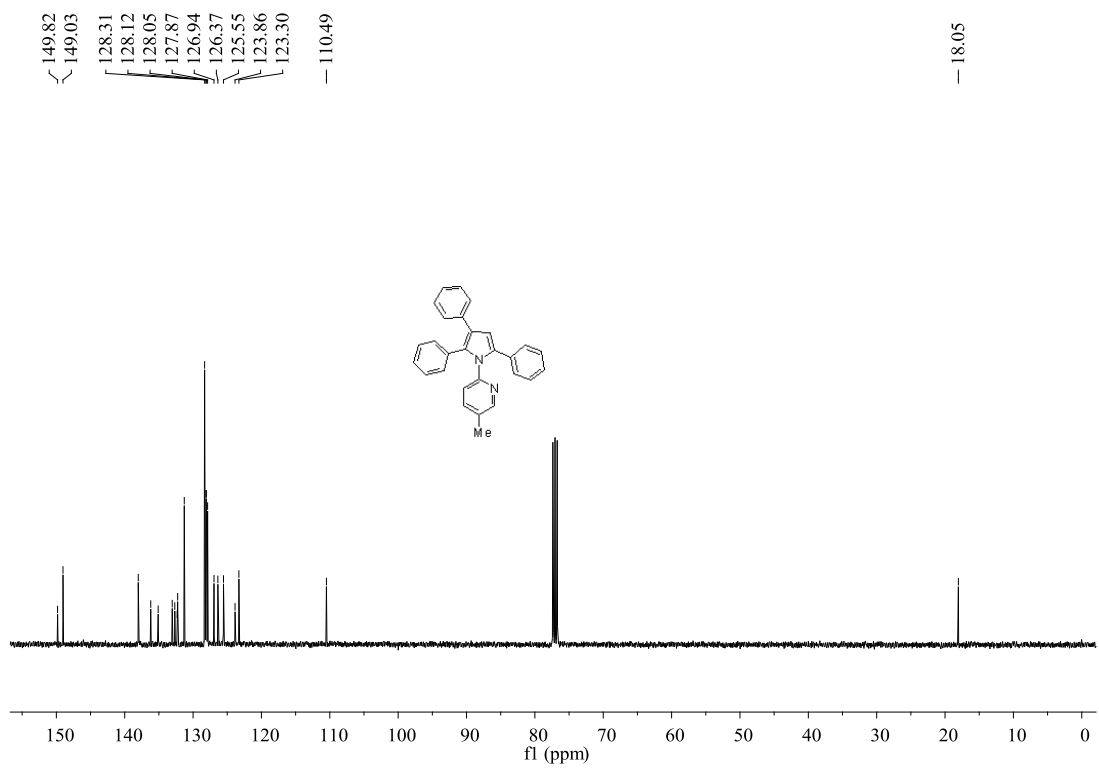

23) 5-Chloro-2-(2, 3, 5-triphenyl-pyrrol-1-yl)-pyridine (**3p**) (Using CDCl<sub>3</sub> as solvent)

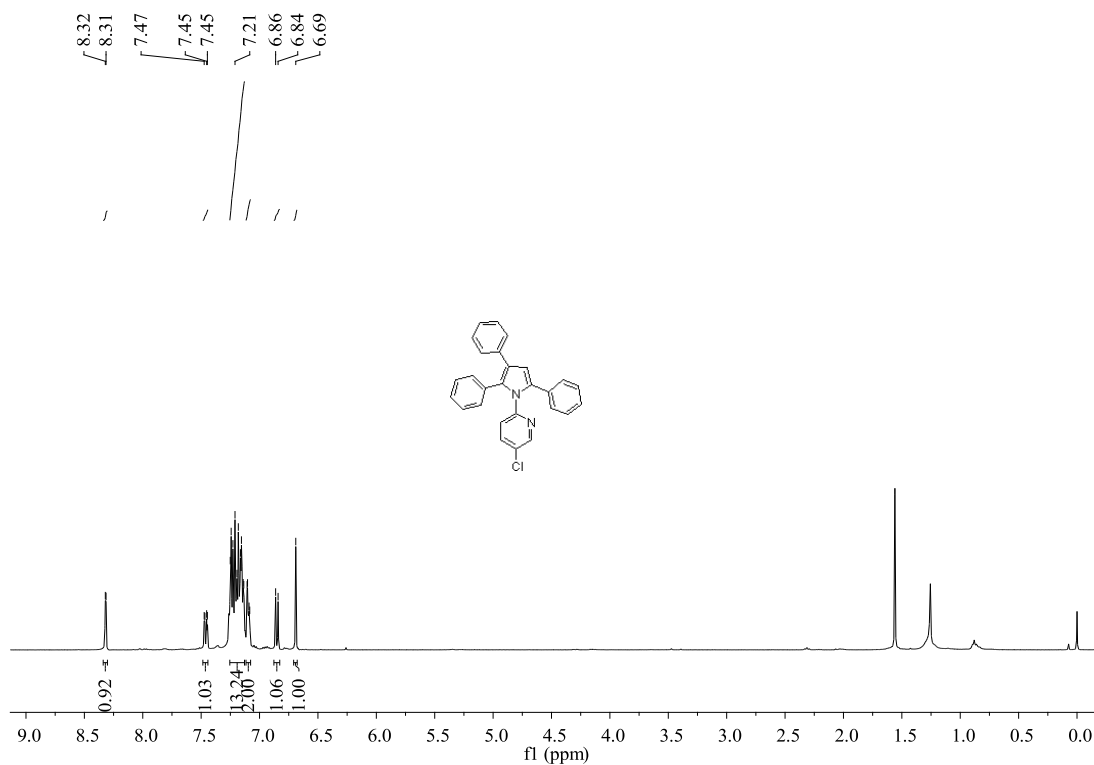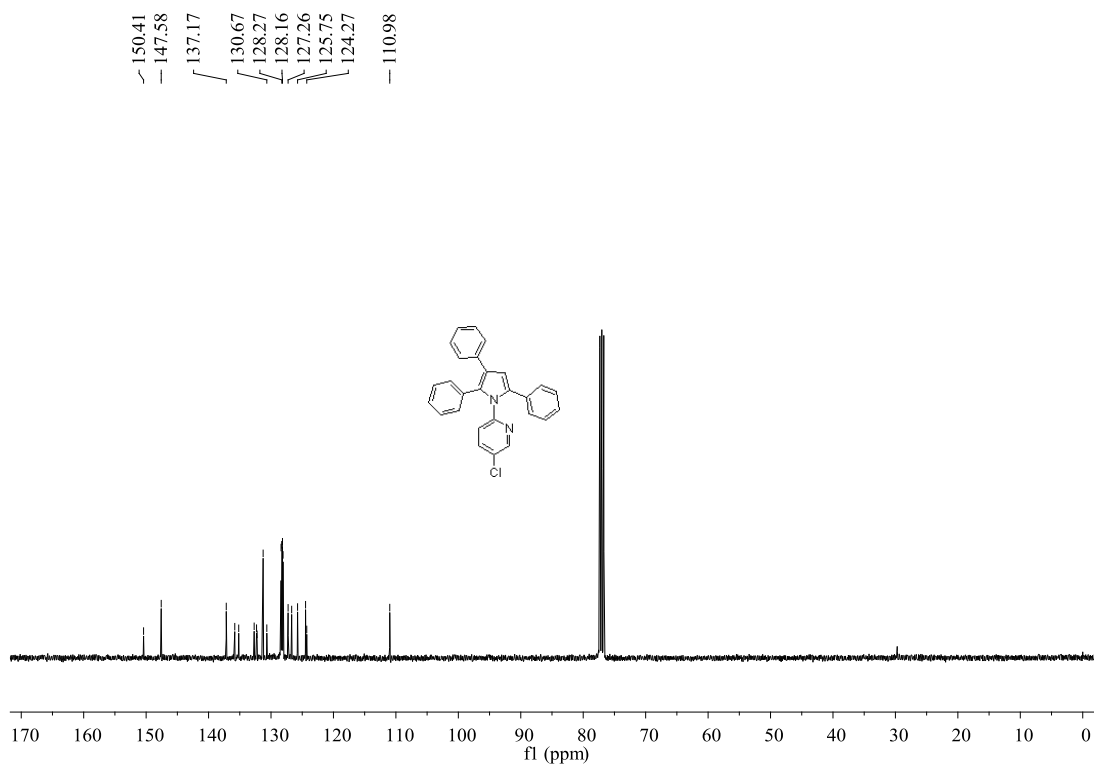

24) 5-Bromo-2-(2, 3, 5-triphenyl-pyrrol-1-yl)-pyridine (**3q**) (Using CDCl<sub>3</sub> as solvent)

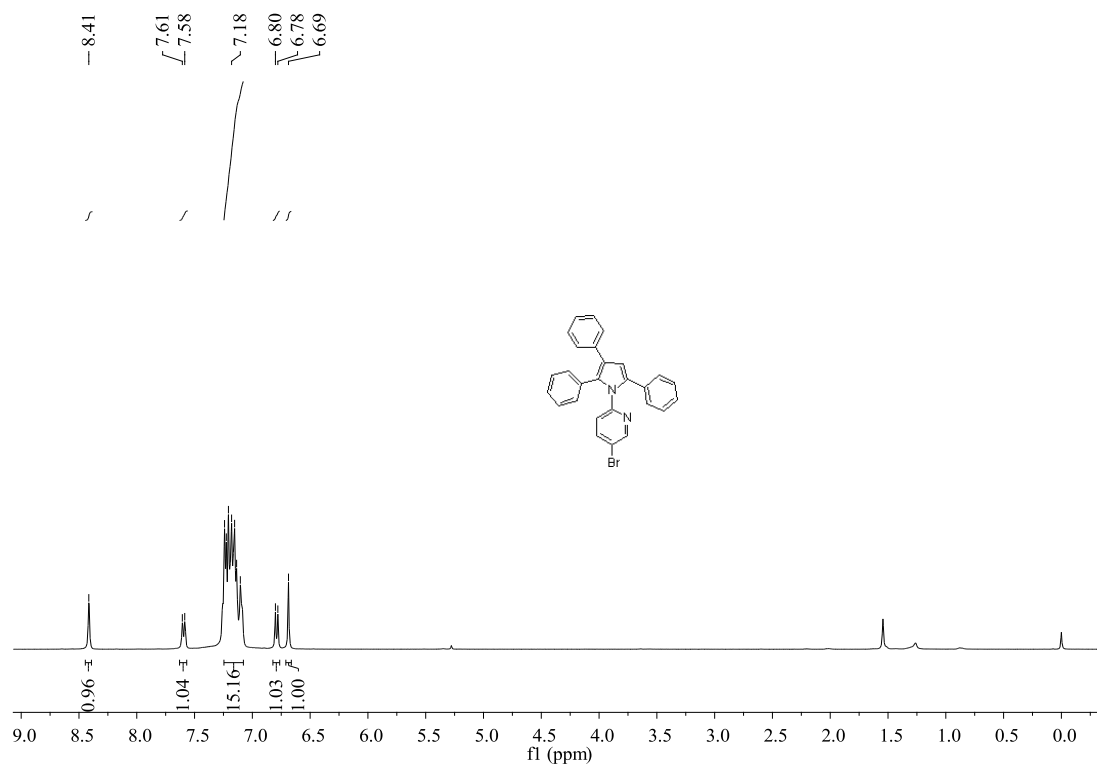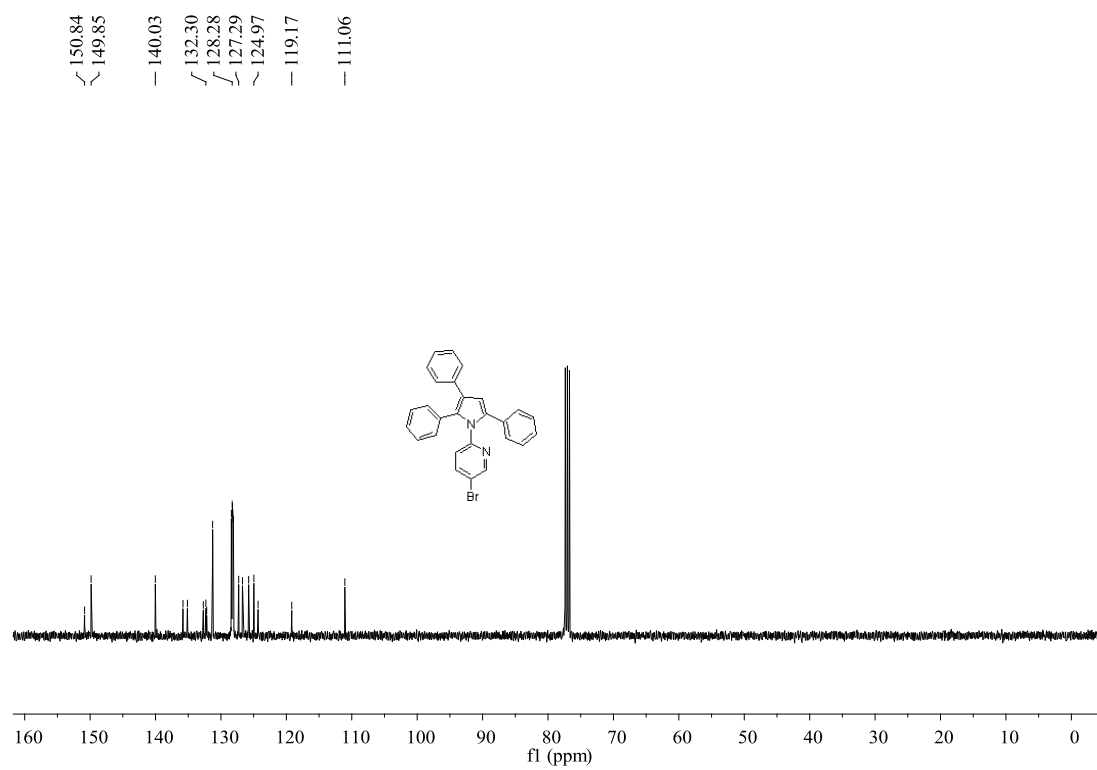

25) 6-(2, 3, 5-Triphenyl-pyrrol-1-yl)-nicotinonitrile (**3r**) (Using CDCl<sub>3</sub> as solvent)

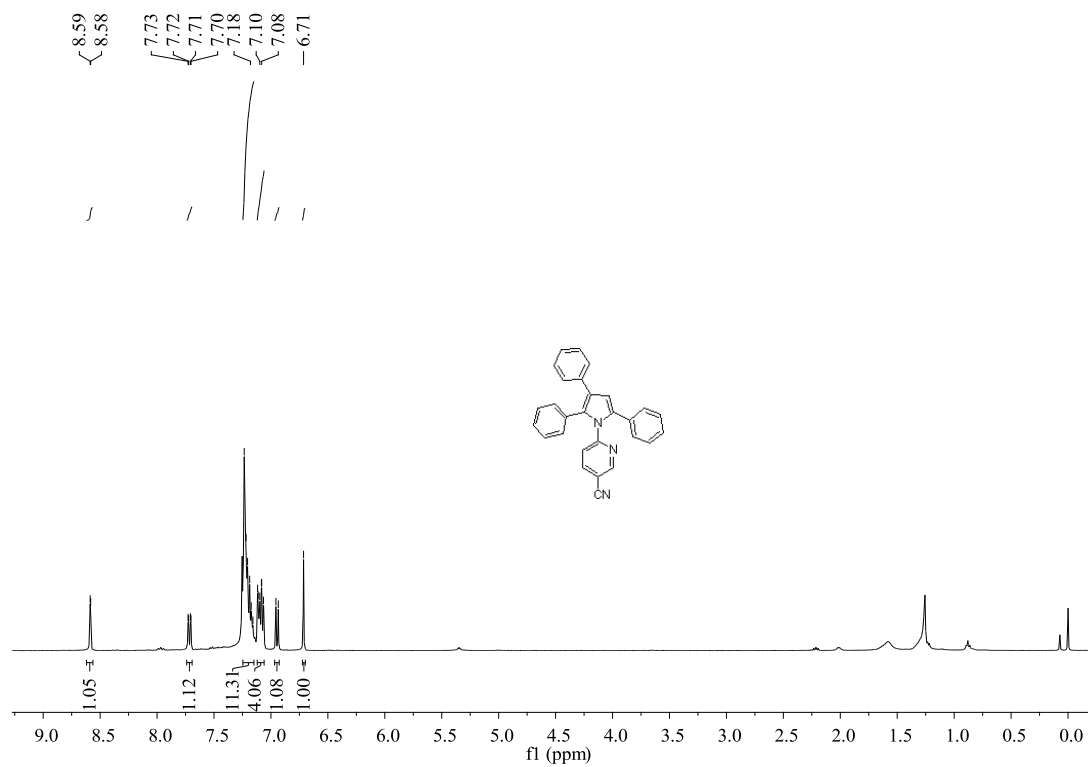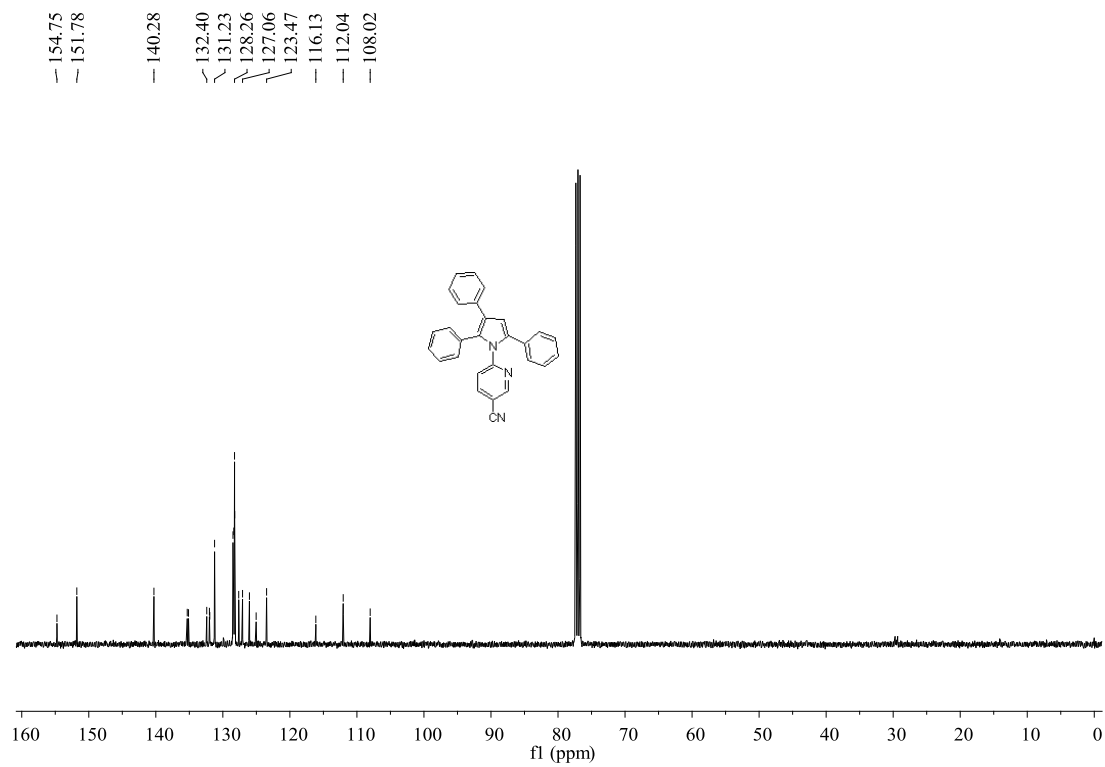

26) 2-(2, 3, 5-Triphenyl-pyrrol-1-yl)-pyrimidine (**3s**) (Using CDCl<sub>3</sub> as solvent)

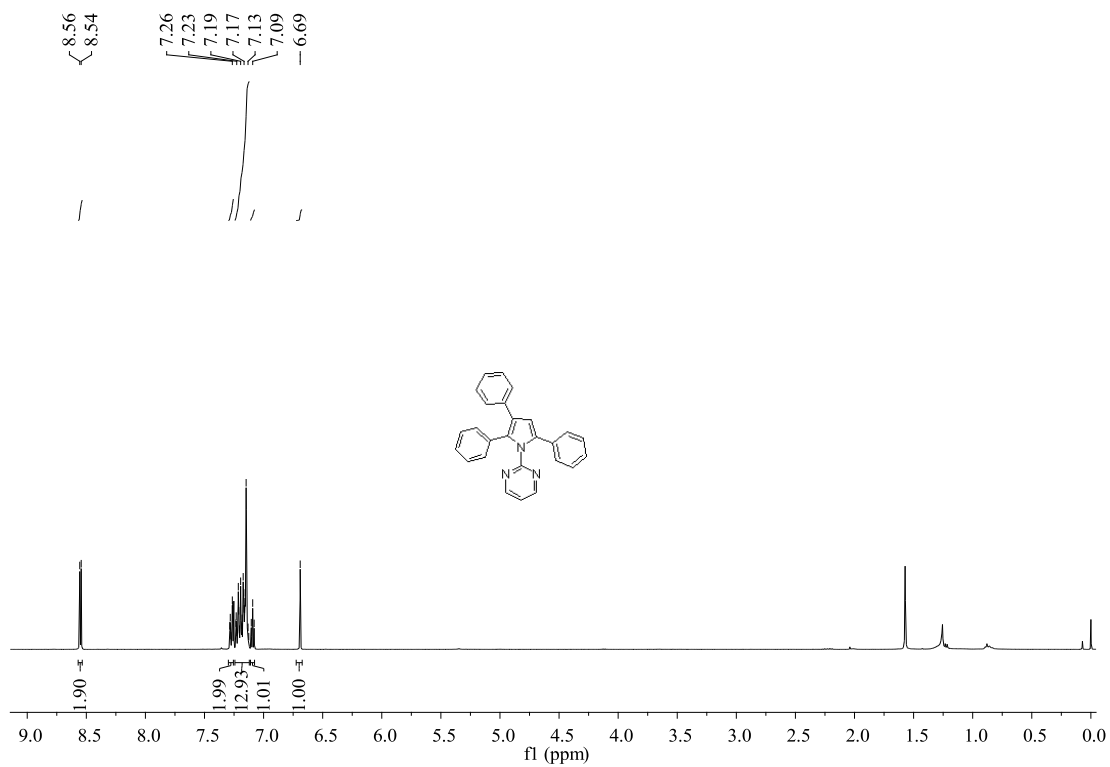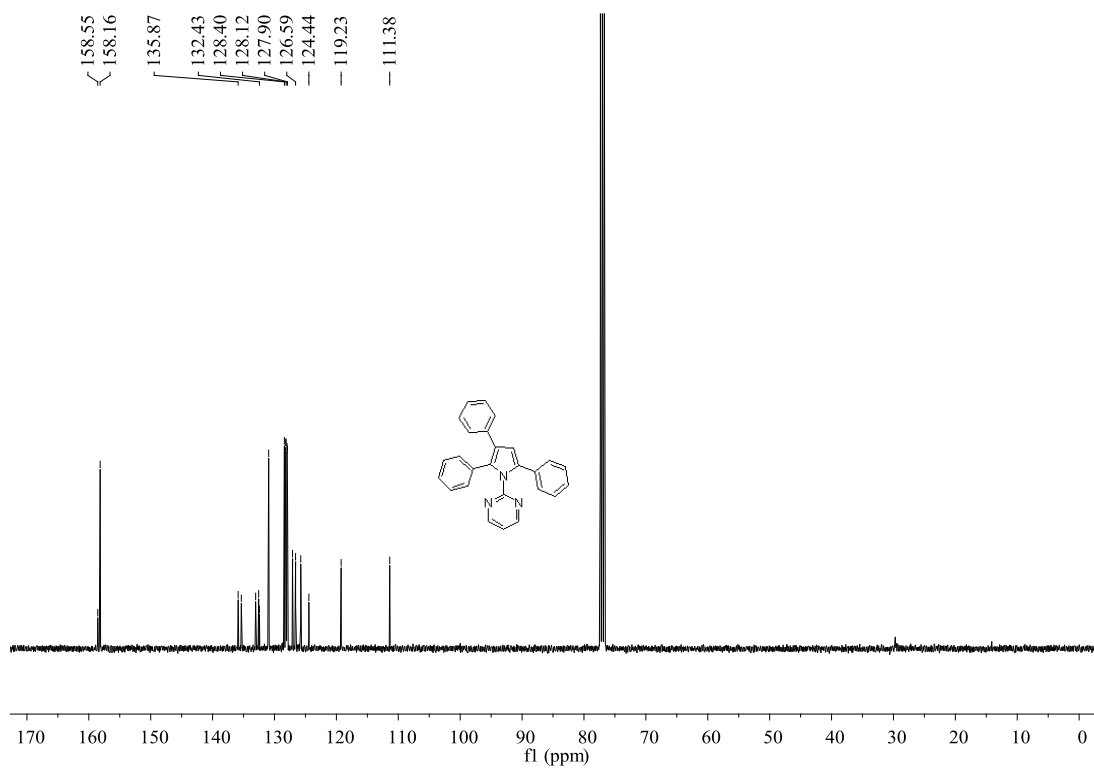

27) 2-(2-Ethyl-3, 5-diphenyl-pyrrol-1-yl)-pyridine (**3t**) (rr=9:1) (Using CDCl<sub>3</sub> as solvent)

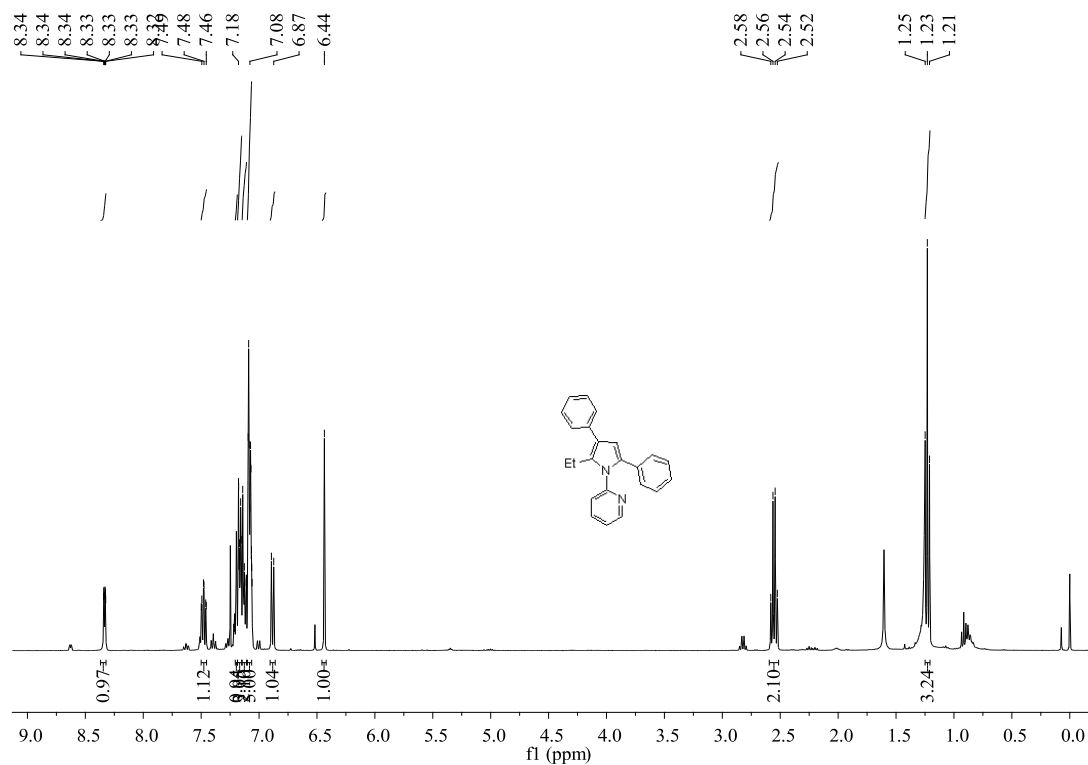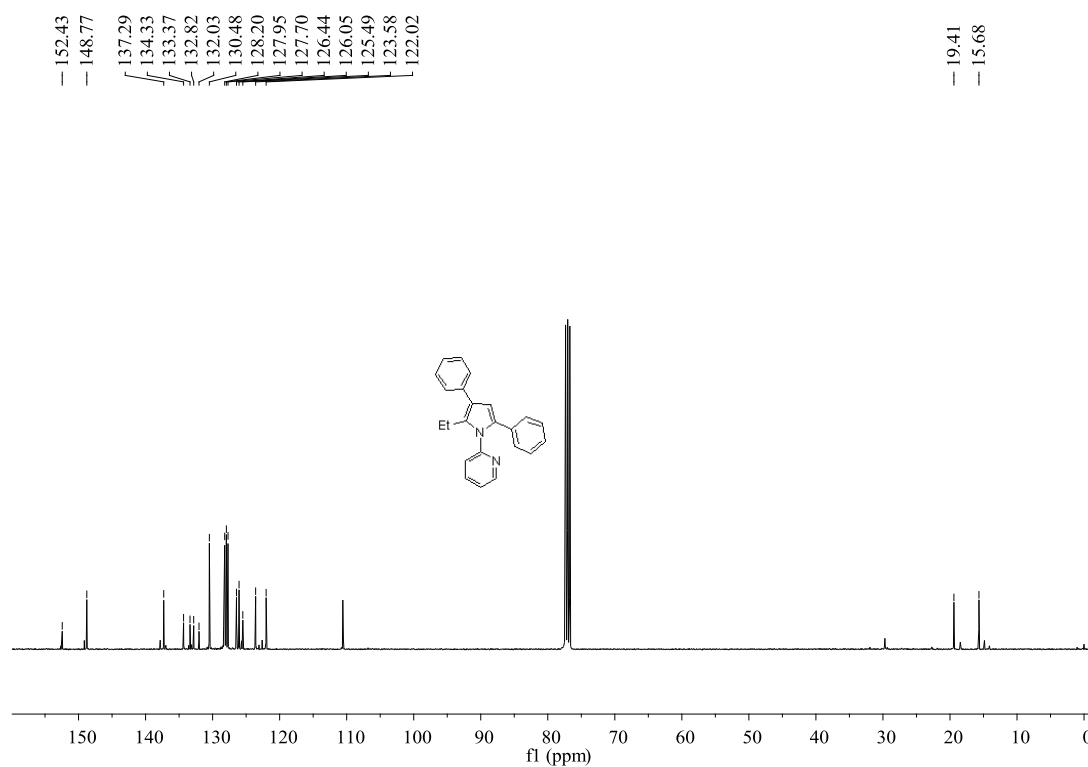

28) 2-(5-Phenyl-2,3-dipropyl-pyrrol-1-yl)-pyridine (**3u**) (Using CDCl<sub>3</sub> as solvent)

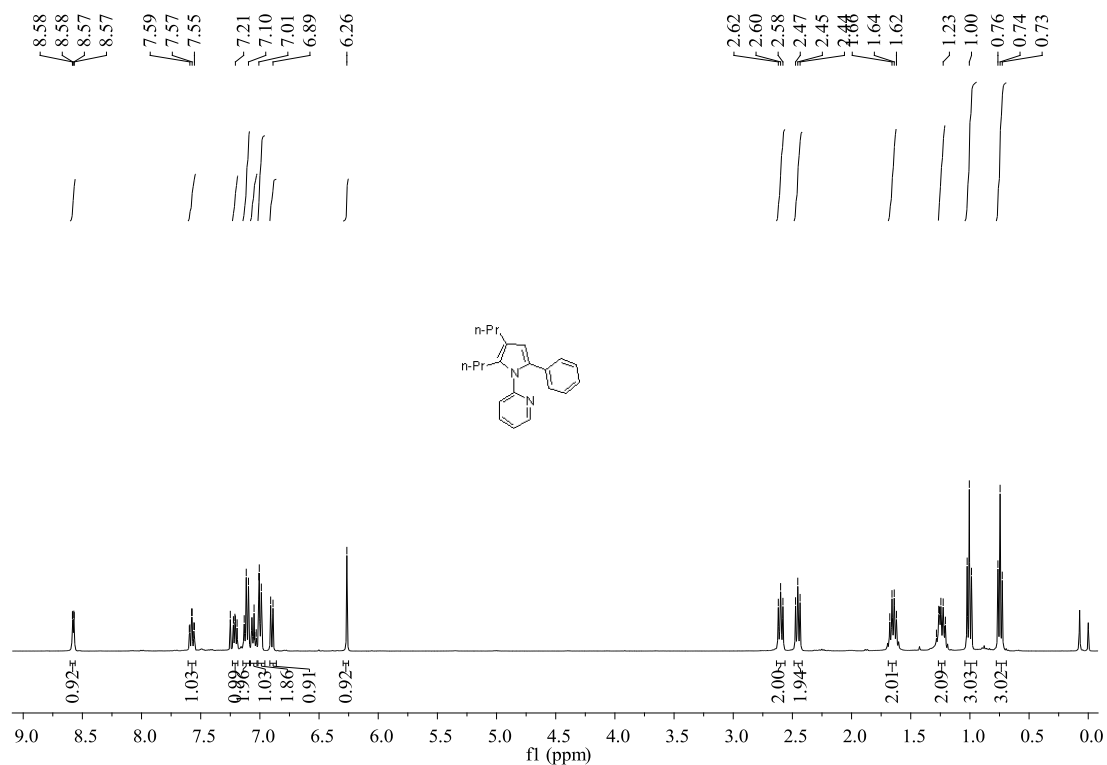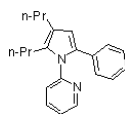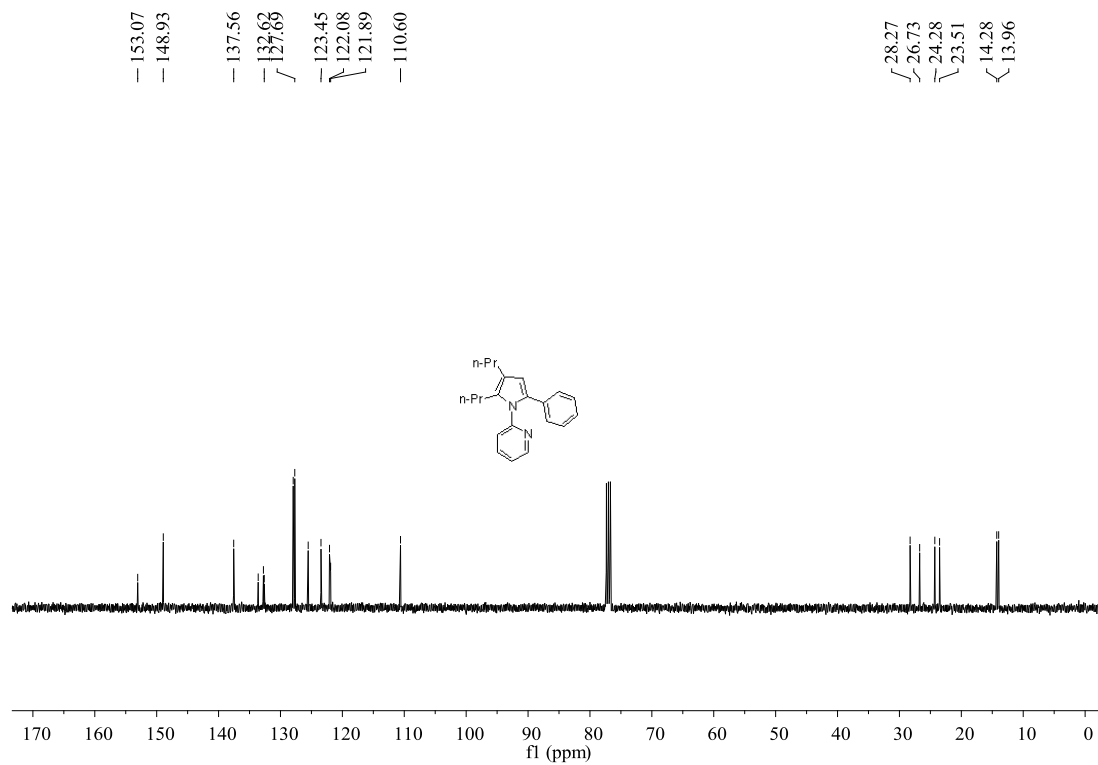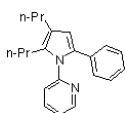



29) 3, 5-Diphenyl-1-pyridin-2-yl-1H-pyrrole-2-carboxylic acid methyl ester (**3v**) (Using CDCl<sub>3</sub> as solvent)

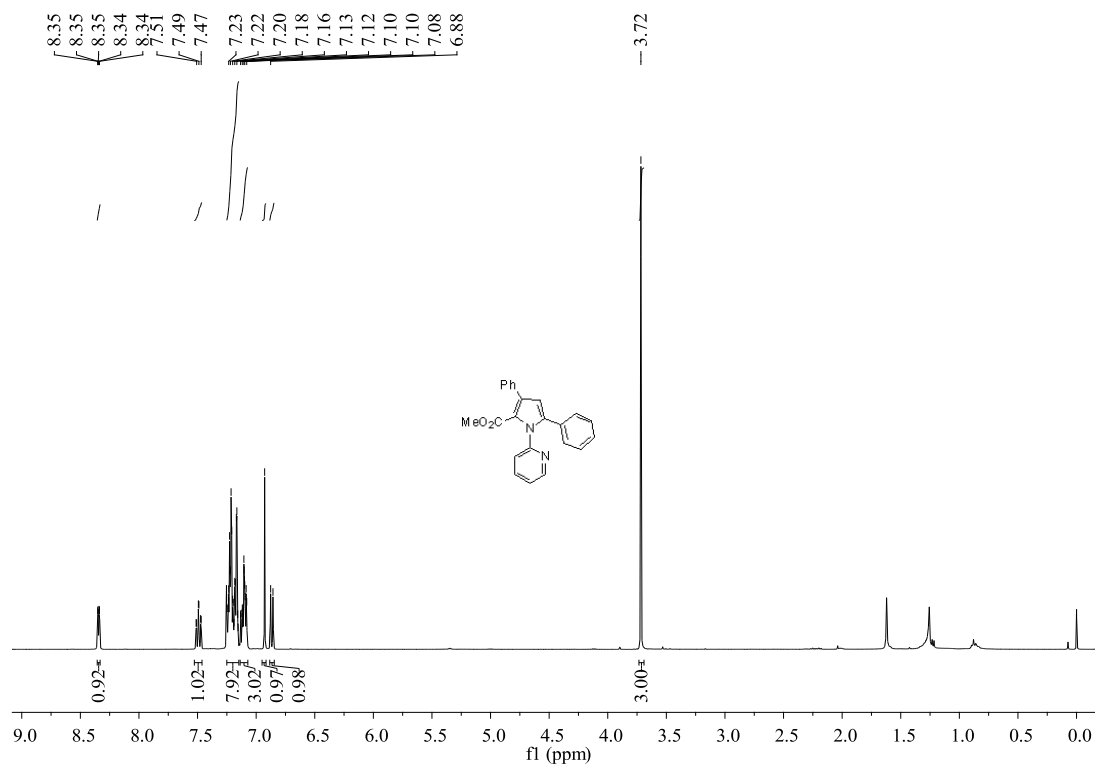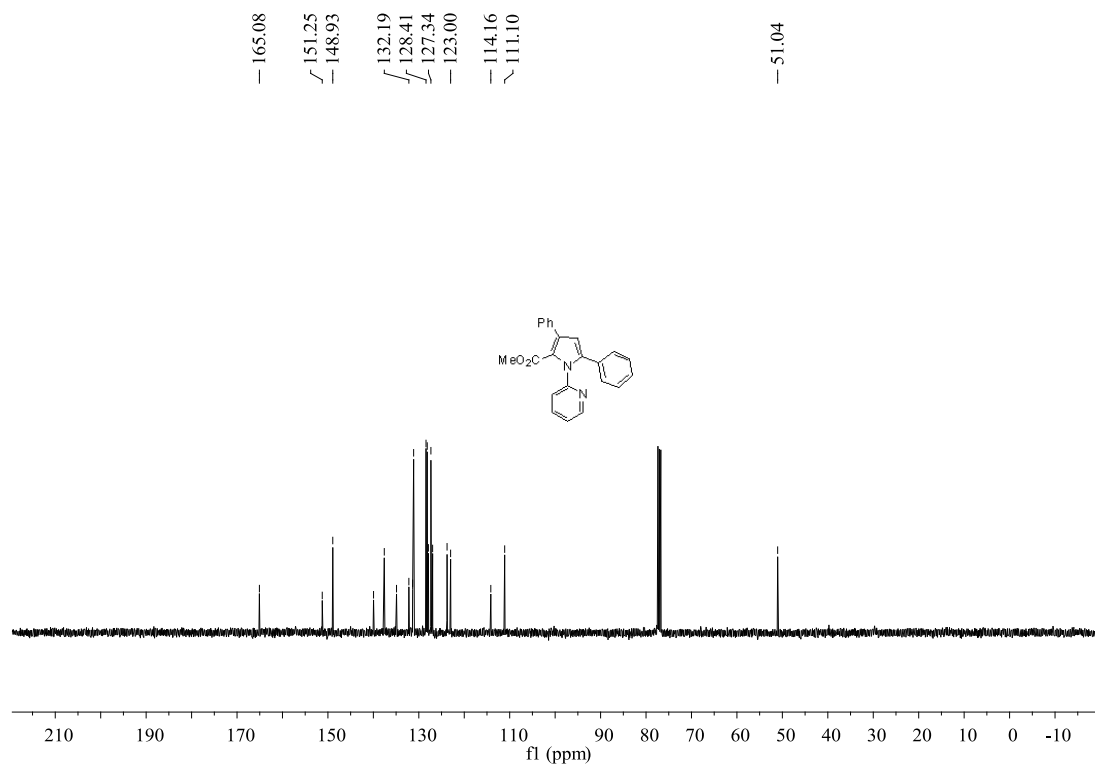

30) (3, 5-Diphenyl-1-pyridin-2-yl-1H-pyrrol-2-yl)-methanol (**3w**) (Using CDCl<sub>3</sub> as solvent)

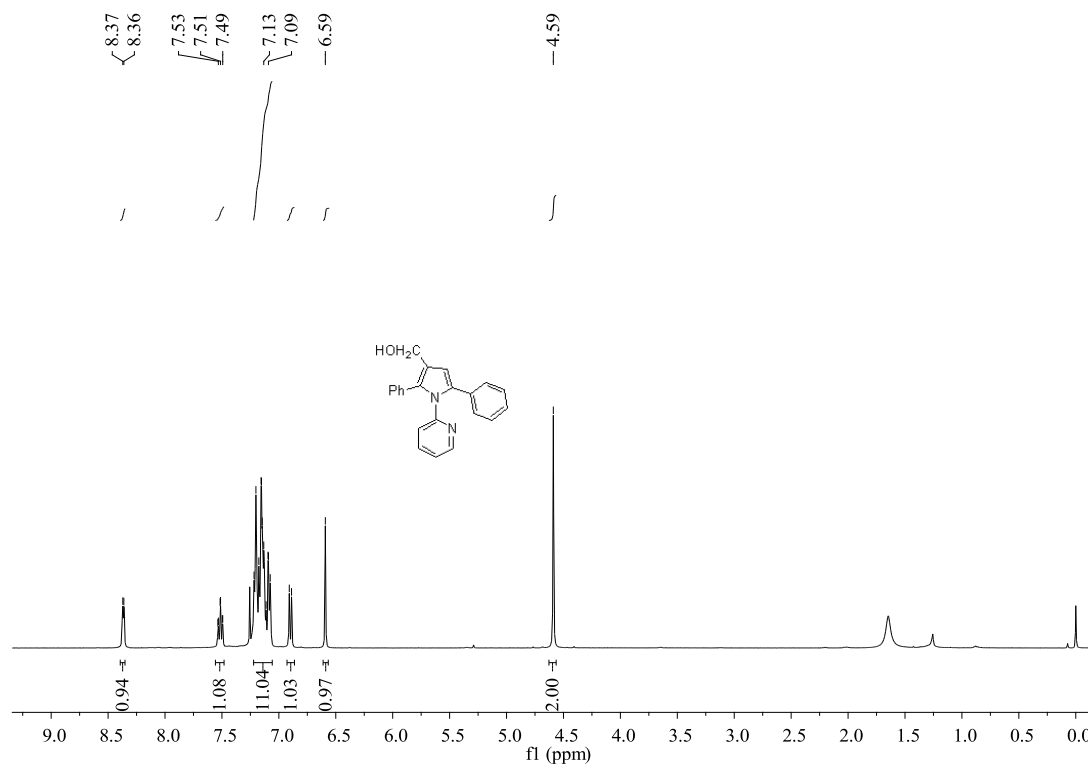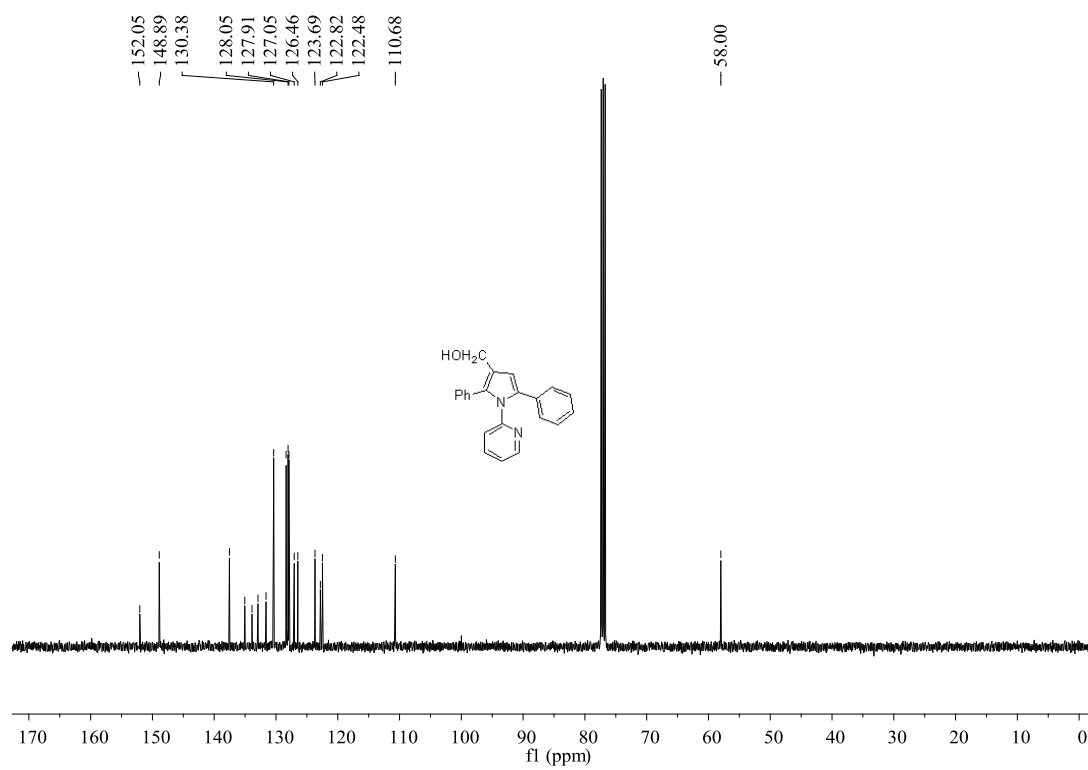

31) (3, 5-Diphenyl-1-pyridin-2-yl-1H-pyrrol-2-yl)-phenyl-methanone (**3x**) (Using CDCl<sub>3</sub> as solvent)

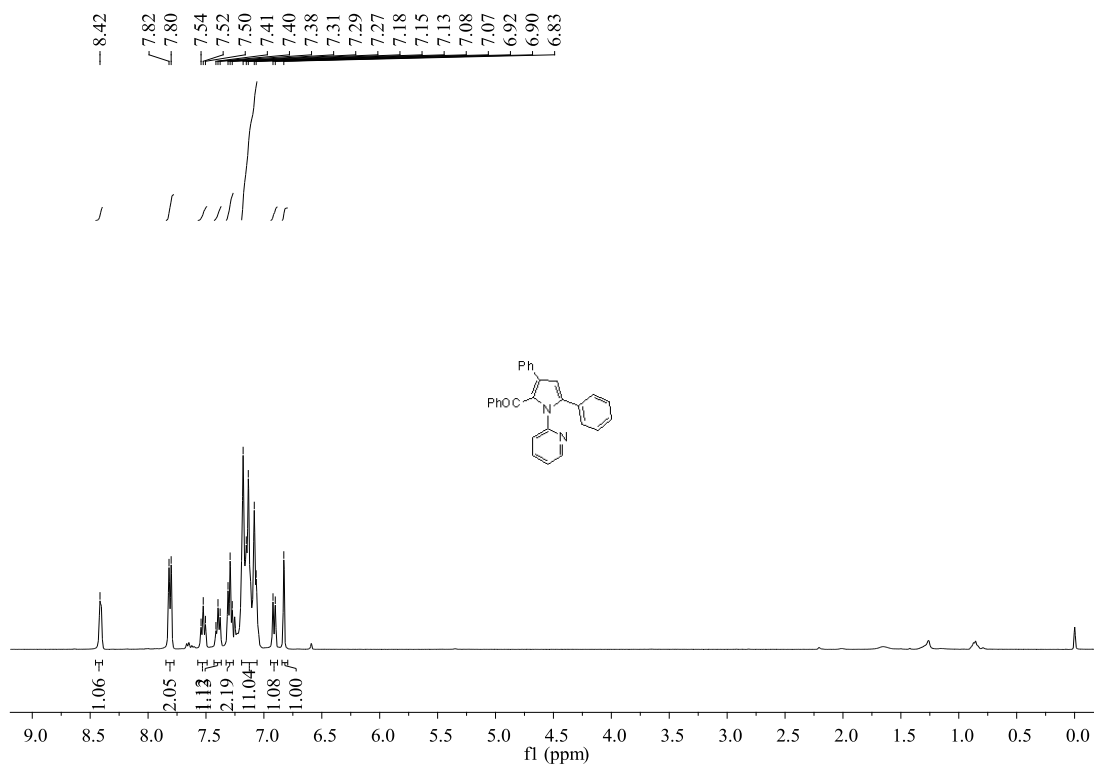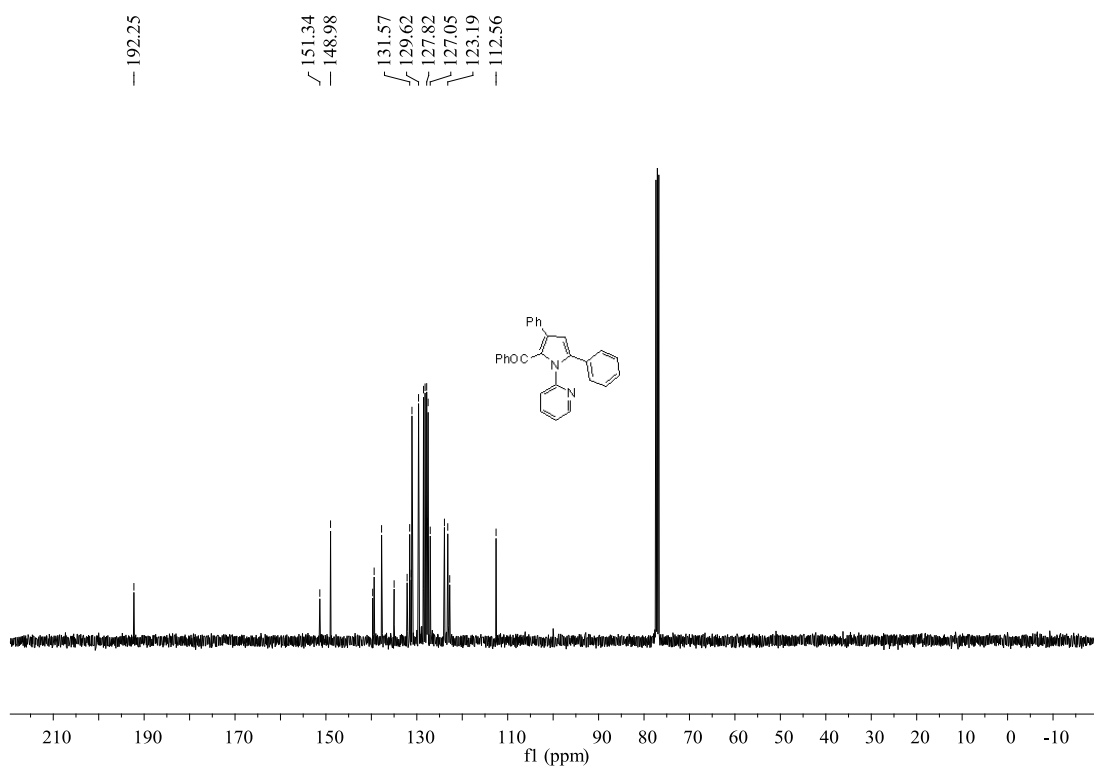

32) 2-(3, 5-Diphenyl-2-vinyl-pyrrol-1-yl)-pyridine (**3y**) (Using CDCl<sub>3</sub> as solvent)

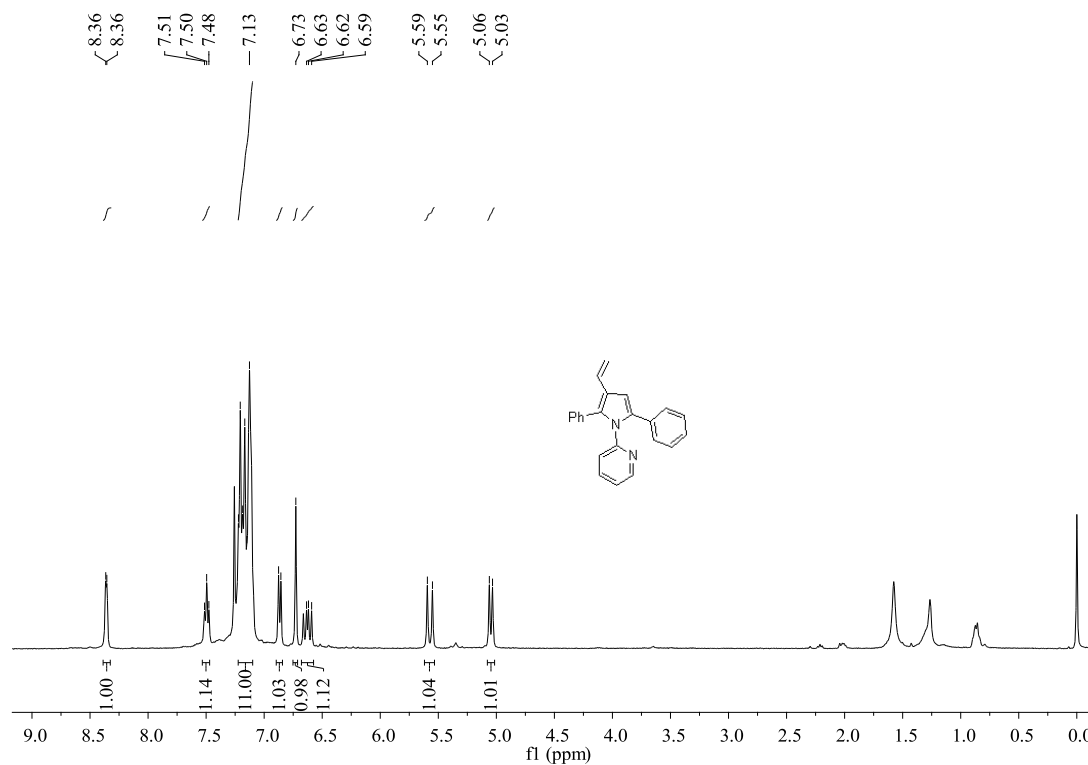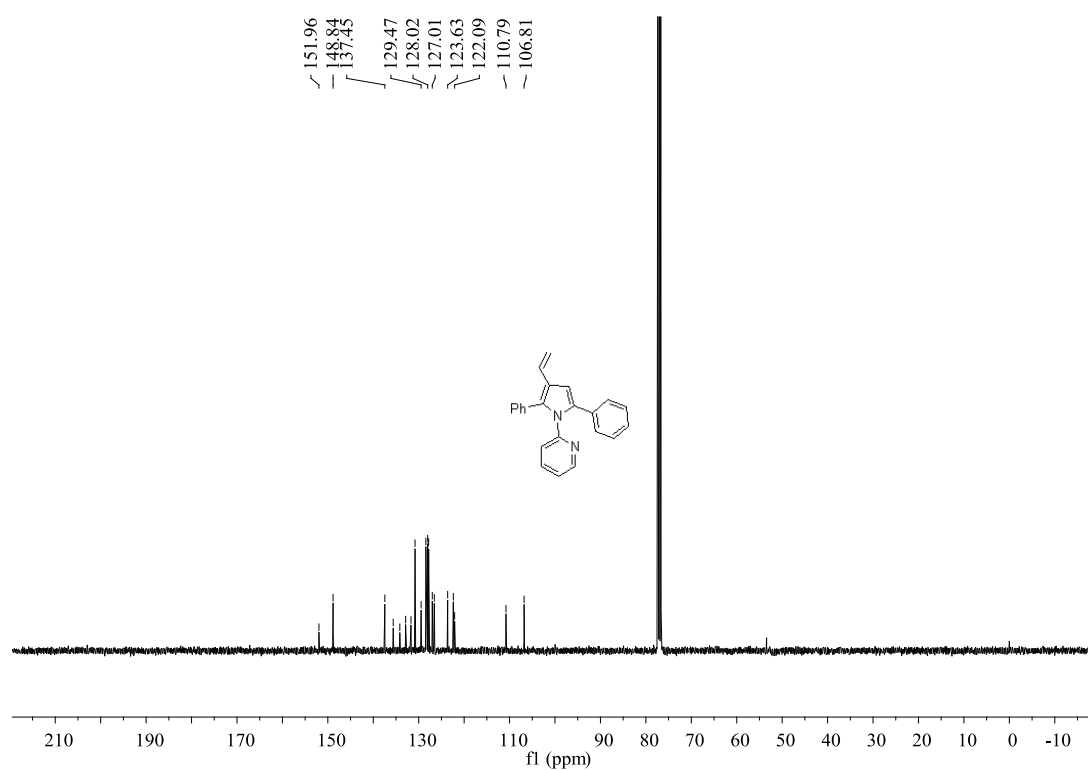

$^1\text{H}$ - $^1\text{H}$  NOE NMR spectrum of **3y**

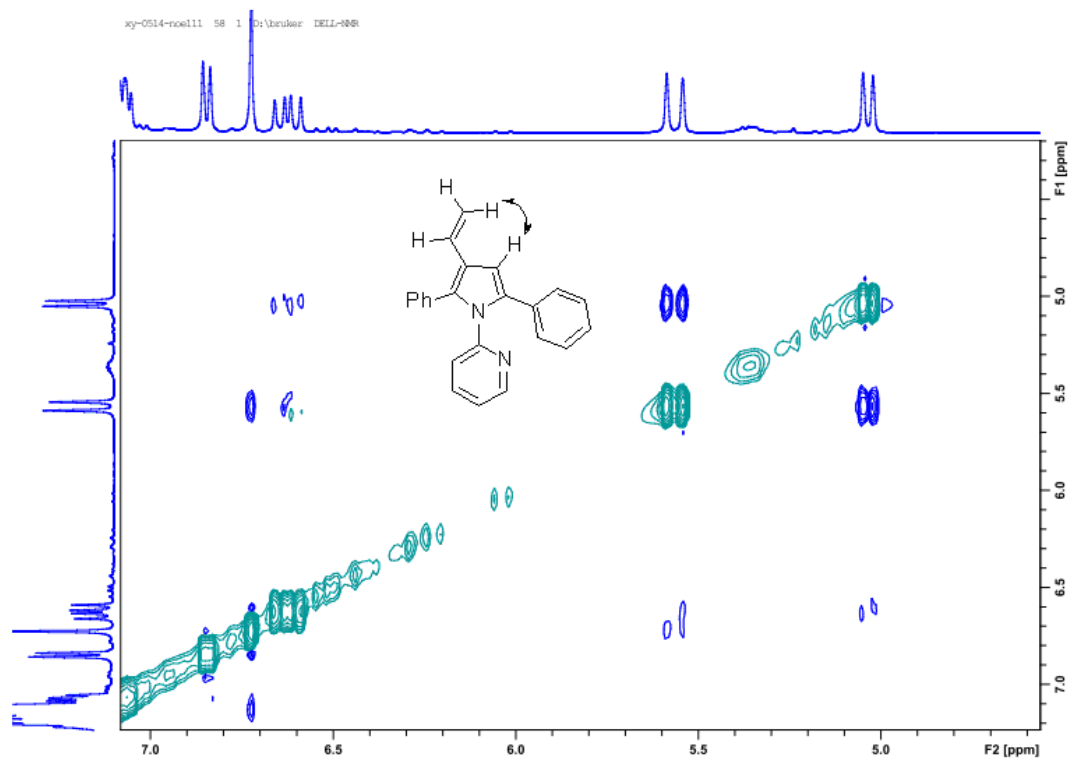

33) 2-(3, 5-Diphenyl-2-phenylethynyl-pyrrol-1-yl)-pyridine (**3z**) (Using CDCl<sub>3</sub> as solvent)

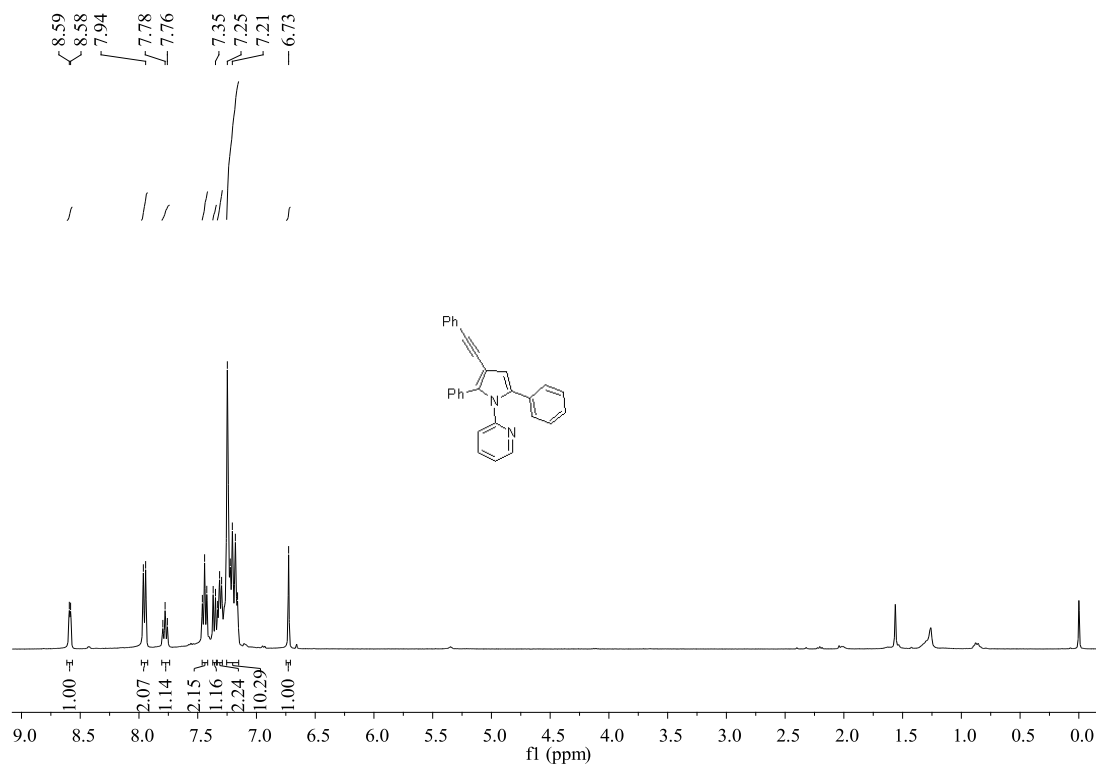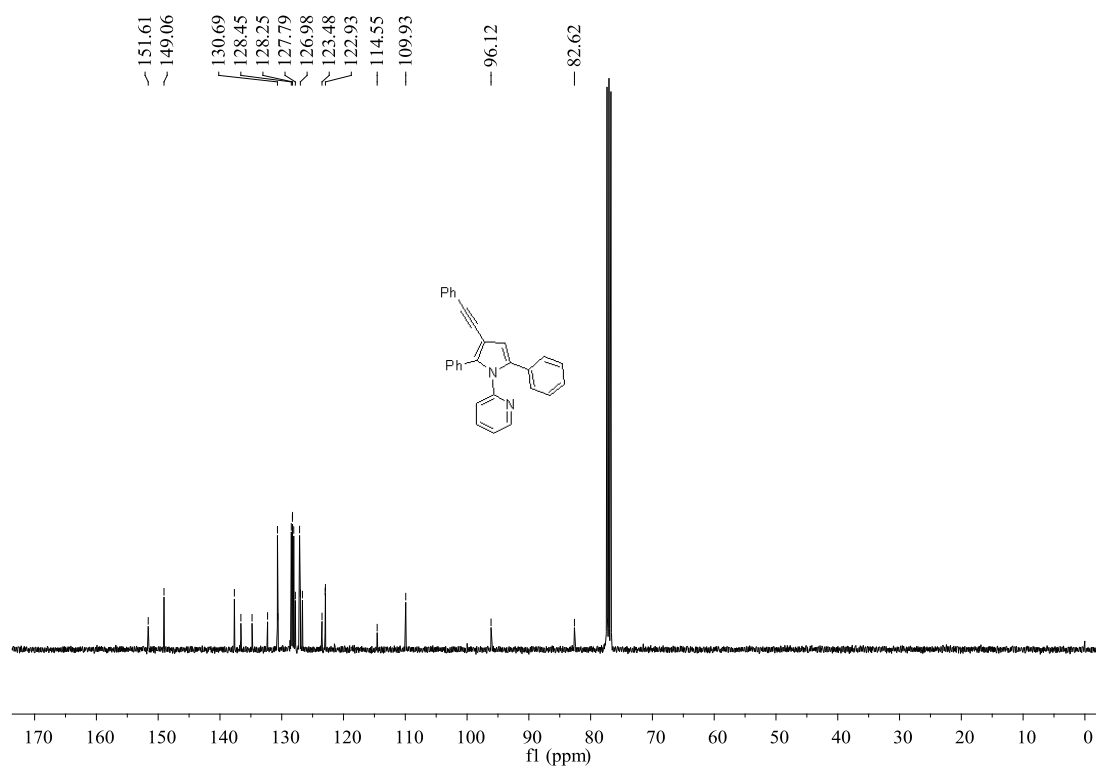

34) 2-(3-Methyl-2-phenyl-4-p-tolyl-5-vinyl-pyrrol-1-yl)-pyridine (**3za**) (Using CDCl<sub>3</sub> as solvent)

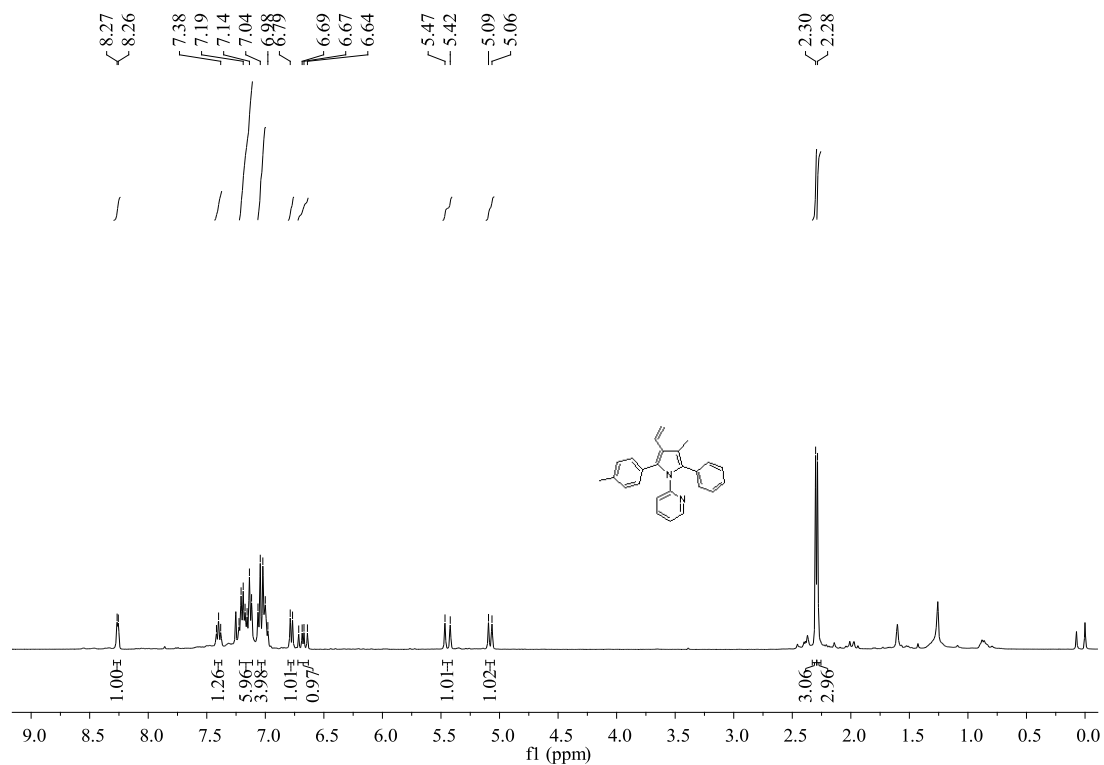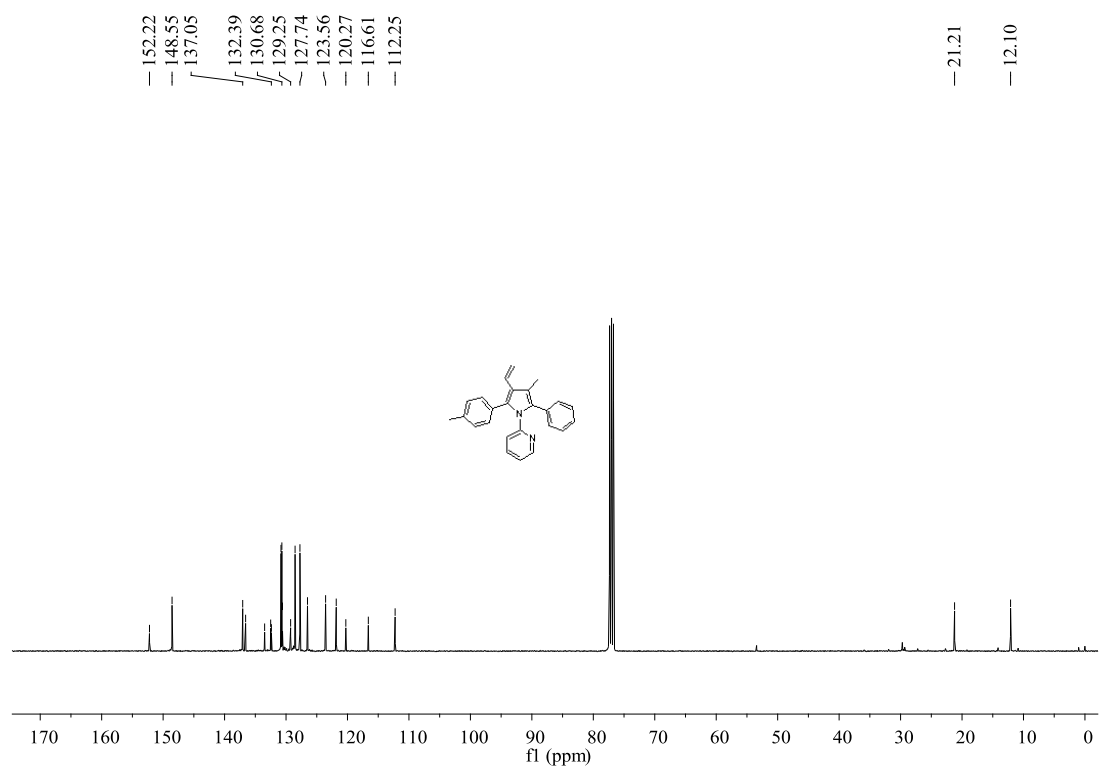

35) 2, 3, 5-Triphenyl-1H-pyrrole (**4a**) (Using CDCl<sub>3</sub> as solvent)

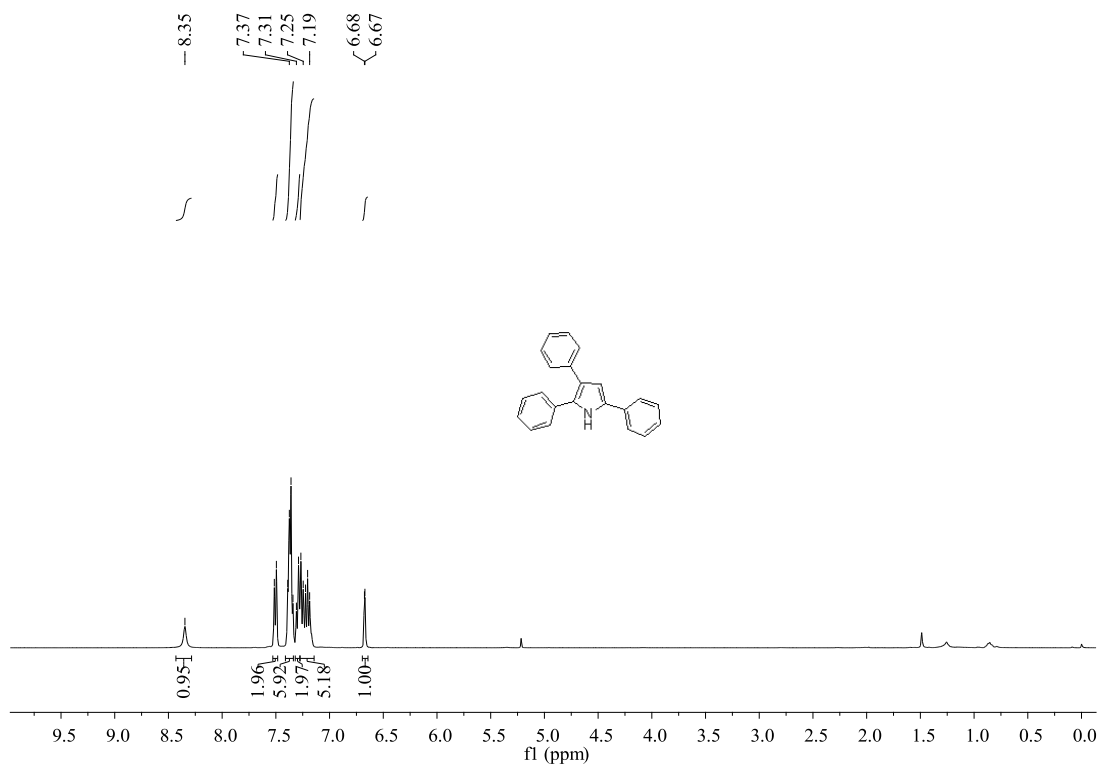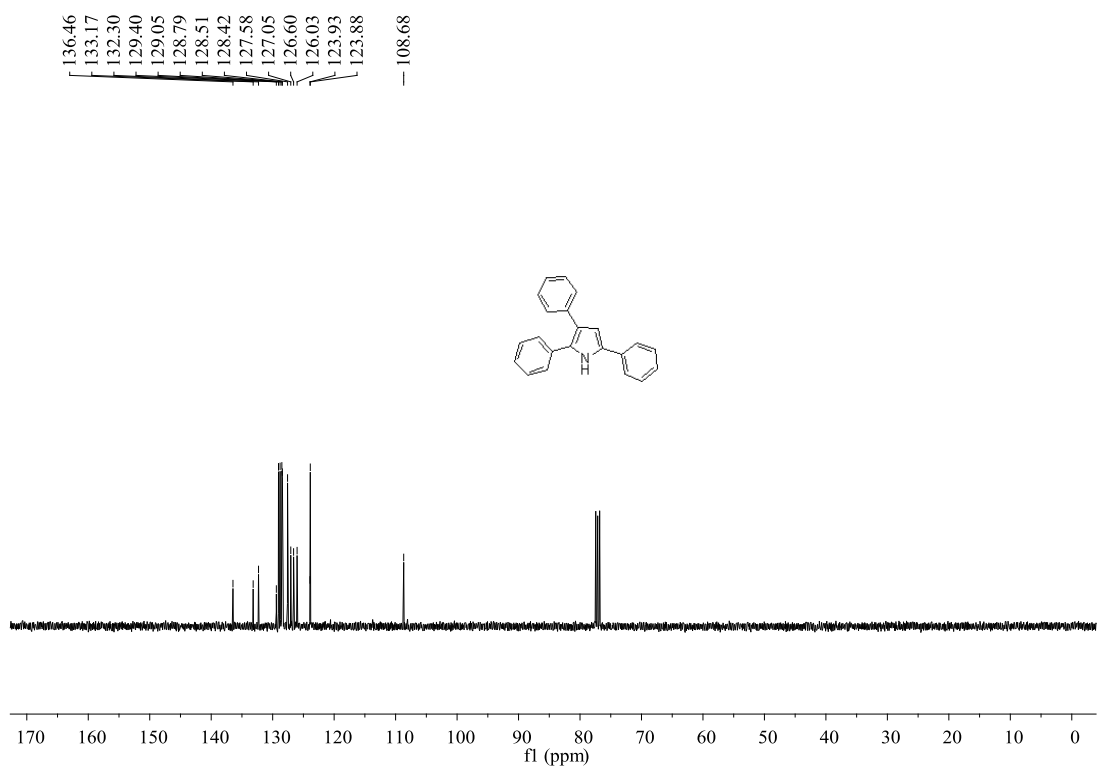



36) 2-phenyl-1H-indole (**4c**) (Using CDCl<sub>3</sub> as solvent)

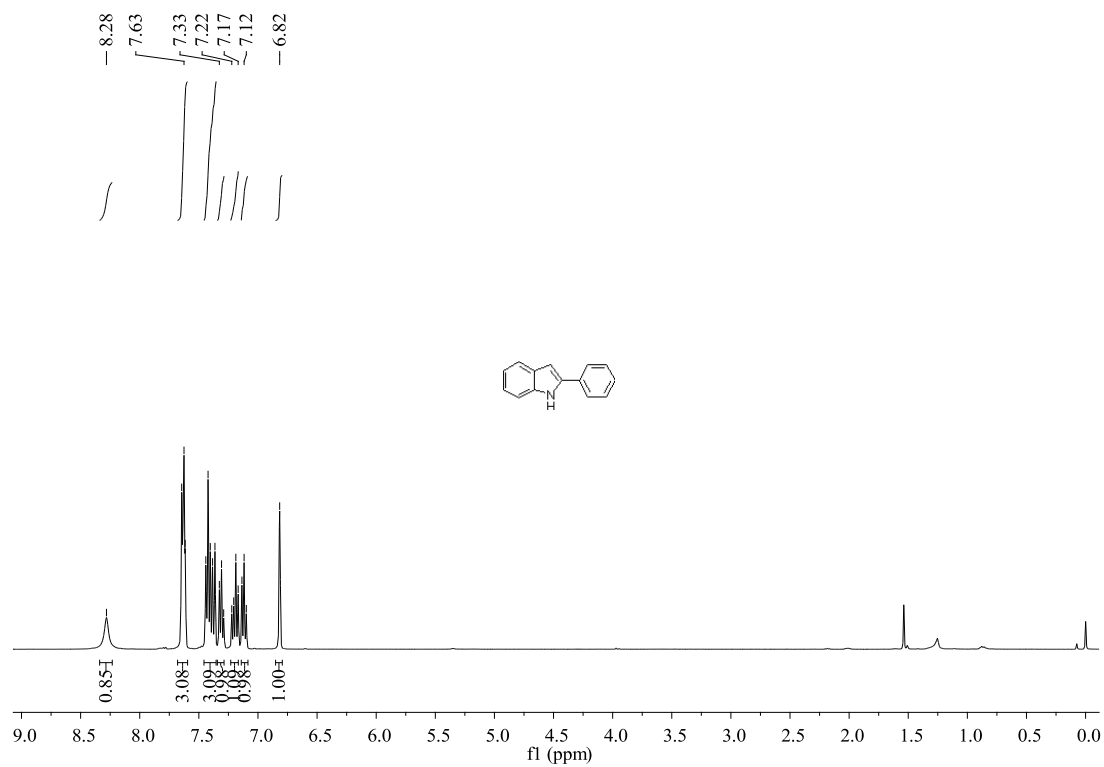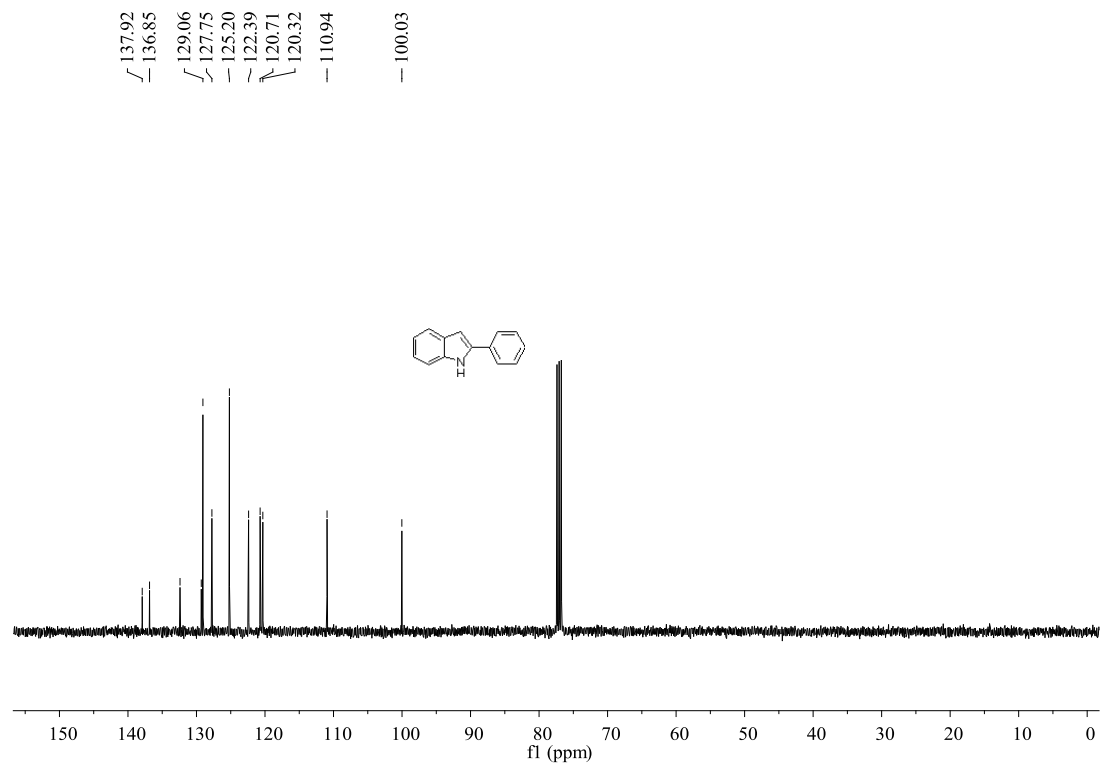

37) H/D Exchange of *N*-pyridyl ketimine (**d-1a**) (Using *d*<sub>6</sub>-DMSO as solvent for <sup>1</sup>H NMR and using CDCl<sub>3</sub> as solvent for <sup>13</sup>C NMR)

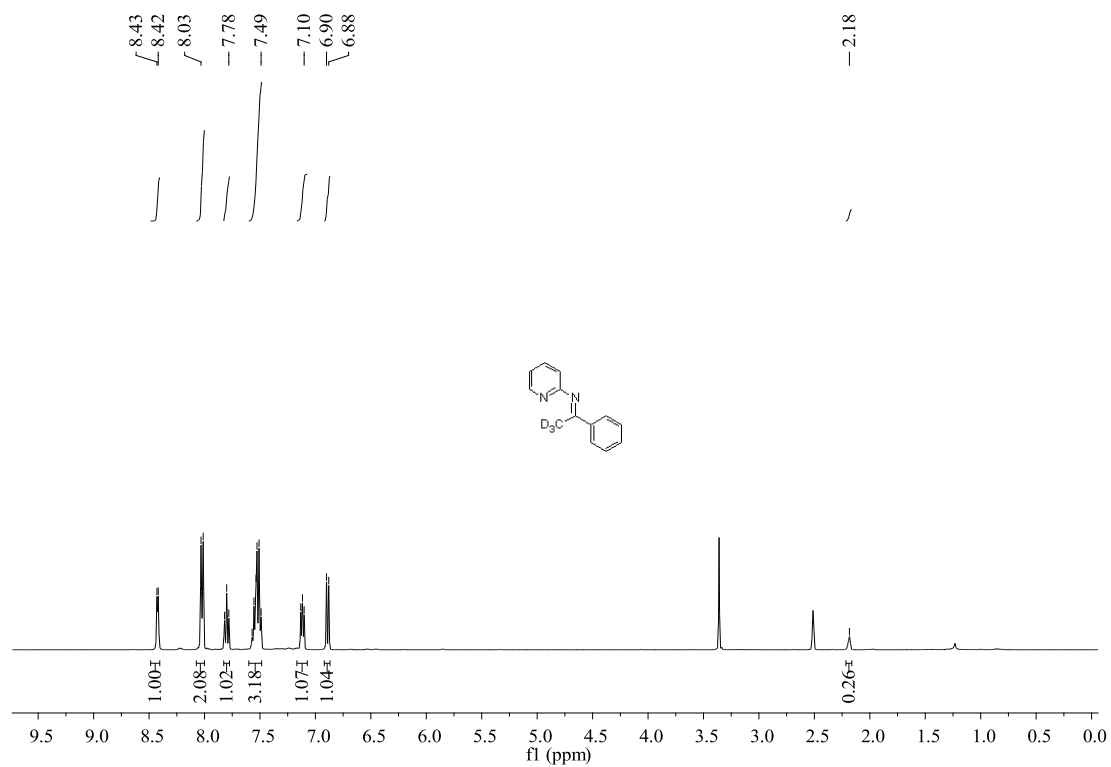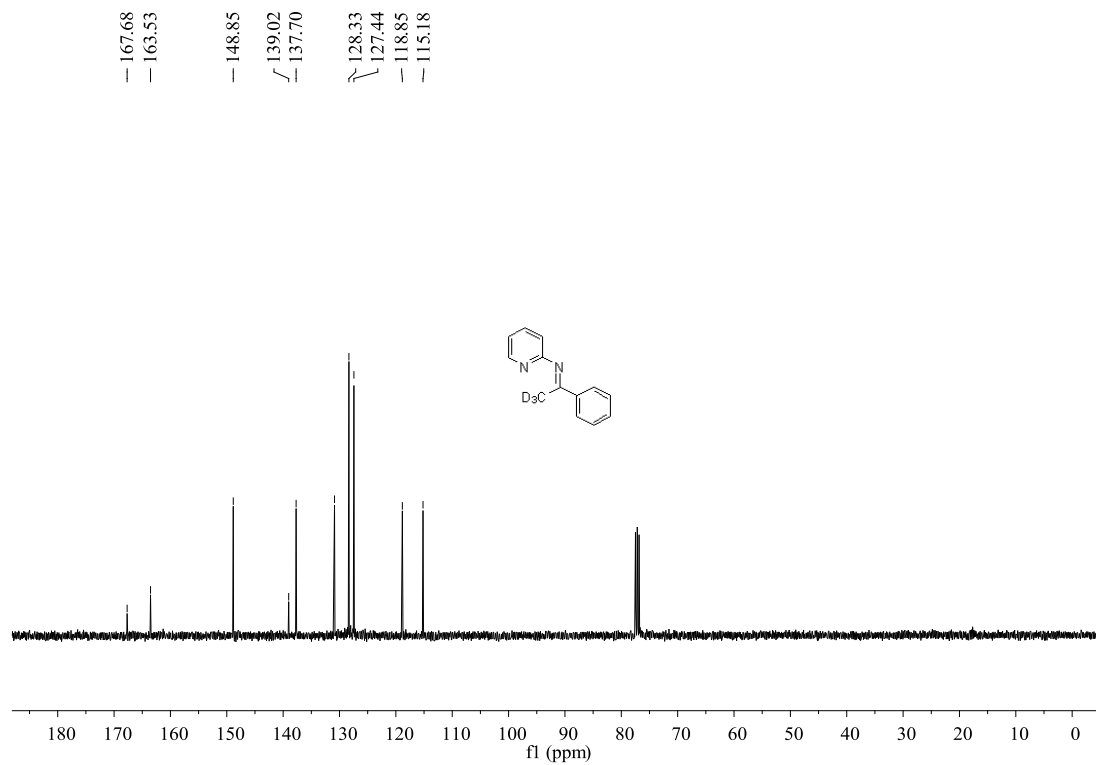

38)  $^1\text{H}$  and  $^{13}\text{C}$  NMR spectrum for **d-3a** (Using  $\text{CDCl}_3$  as solvent)

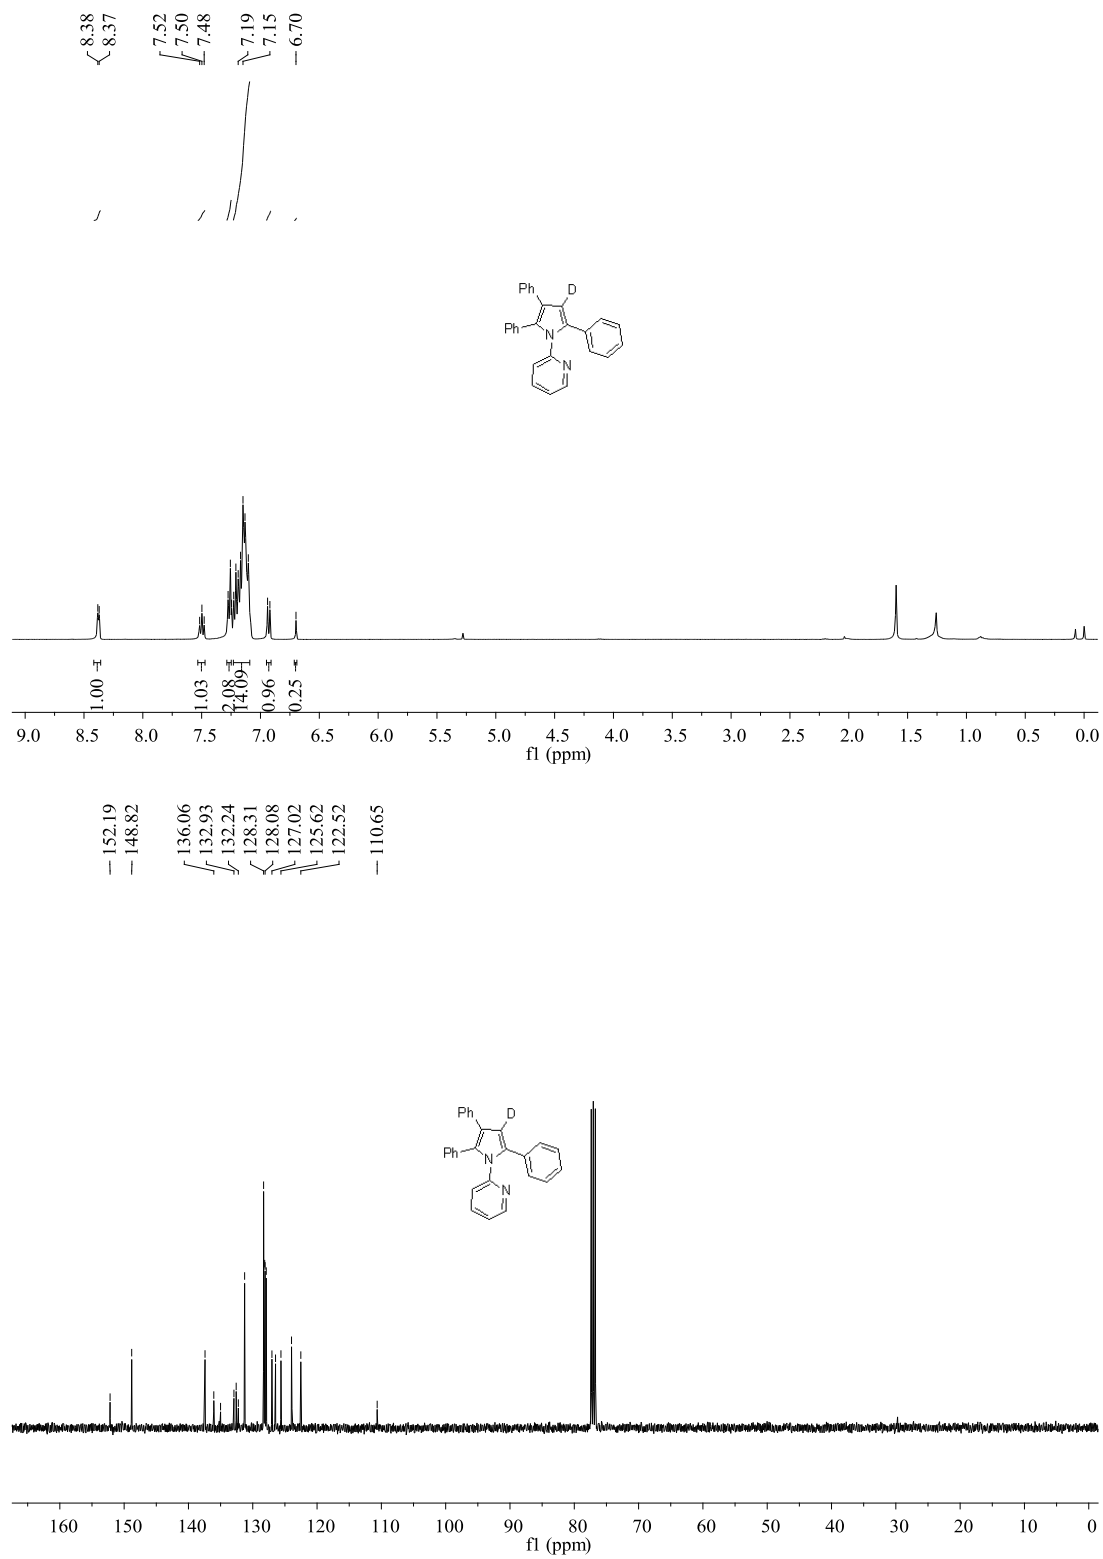

39) The crude  $^1\text{H}$  NMR spectrum for calculating **KIE** value via parallel reactions (Using  $\text{CDCl}_3$  as

solvent)

a. The crude  $^1\text{H}$  NMR spectrum for the reaction of **1a** with **2a**.

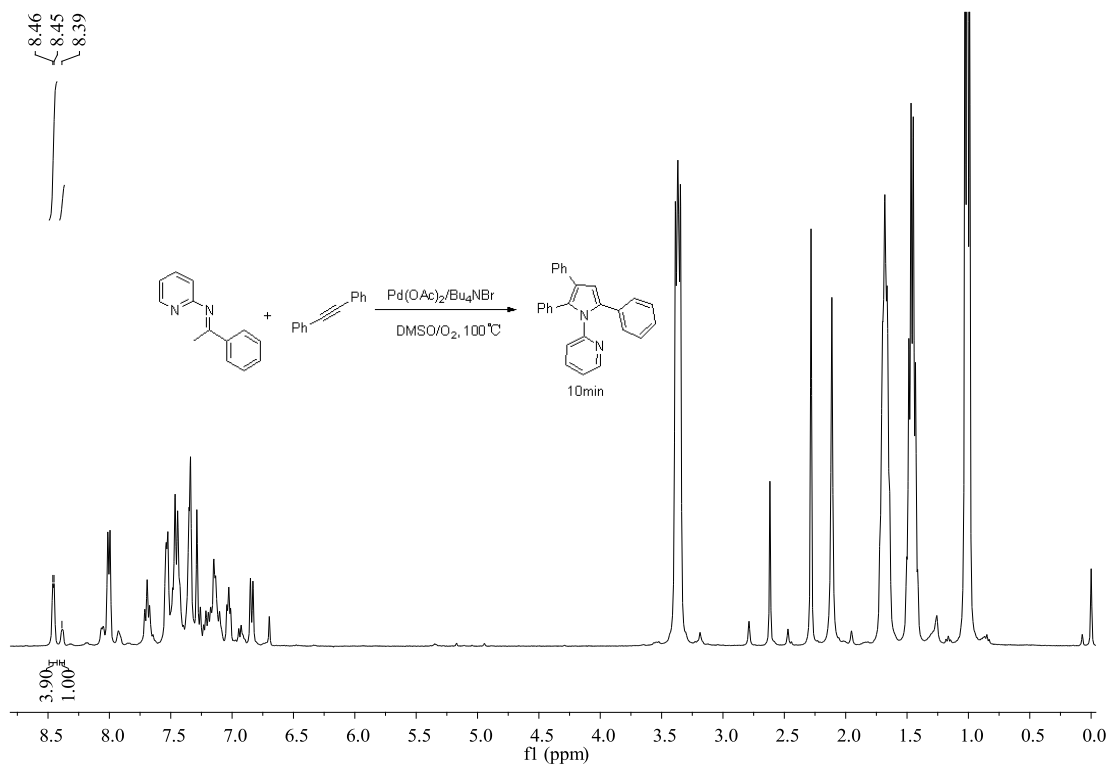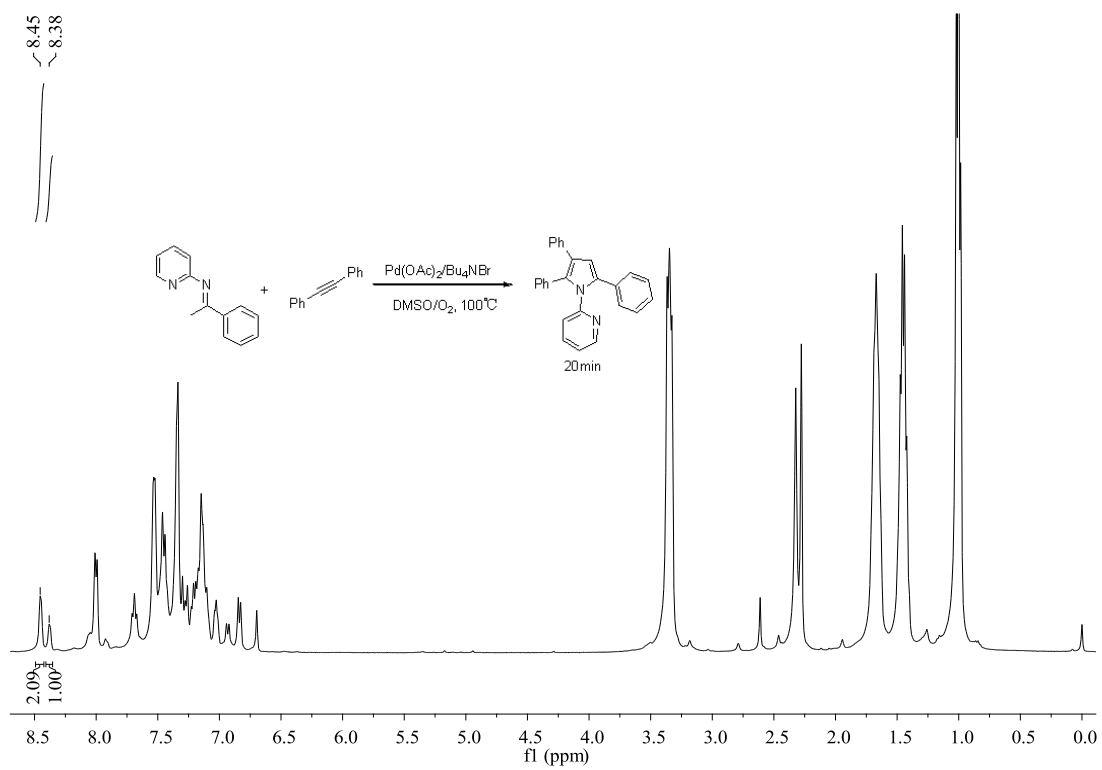

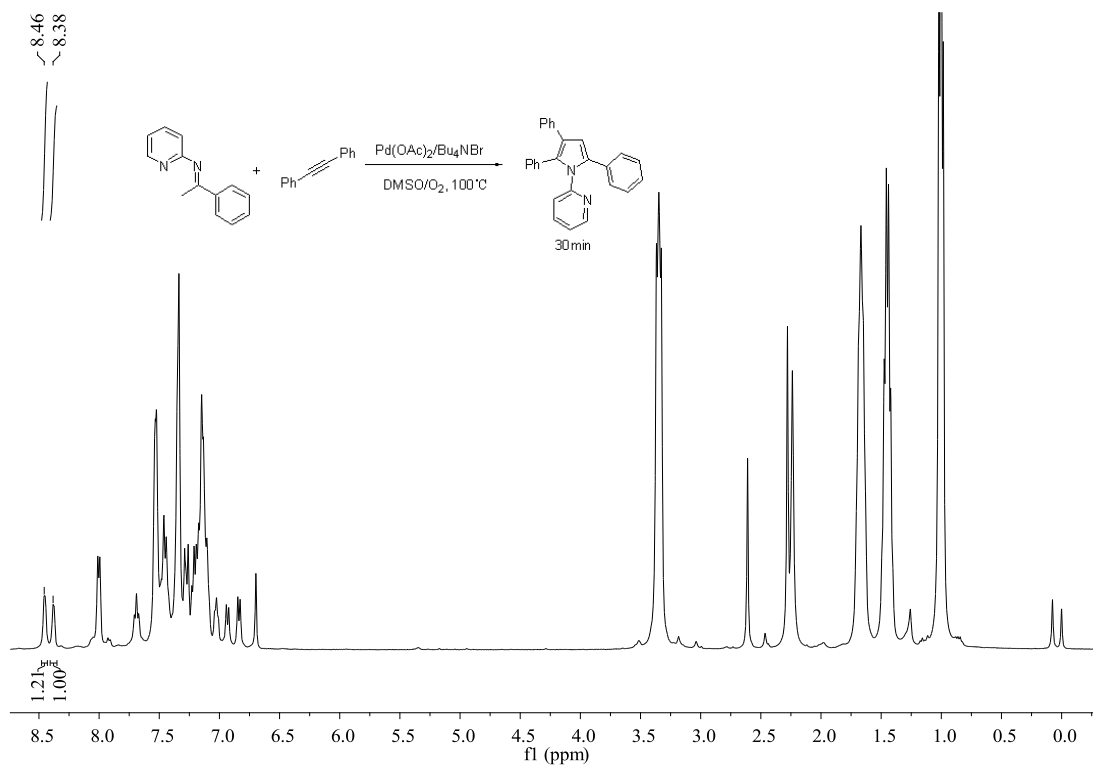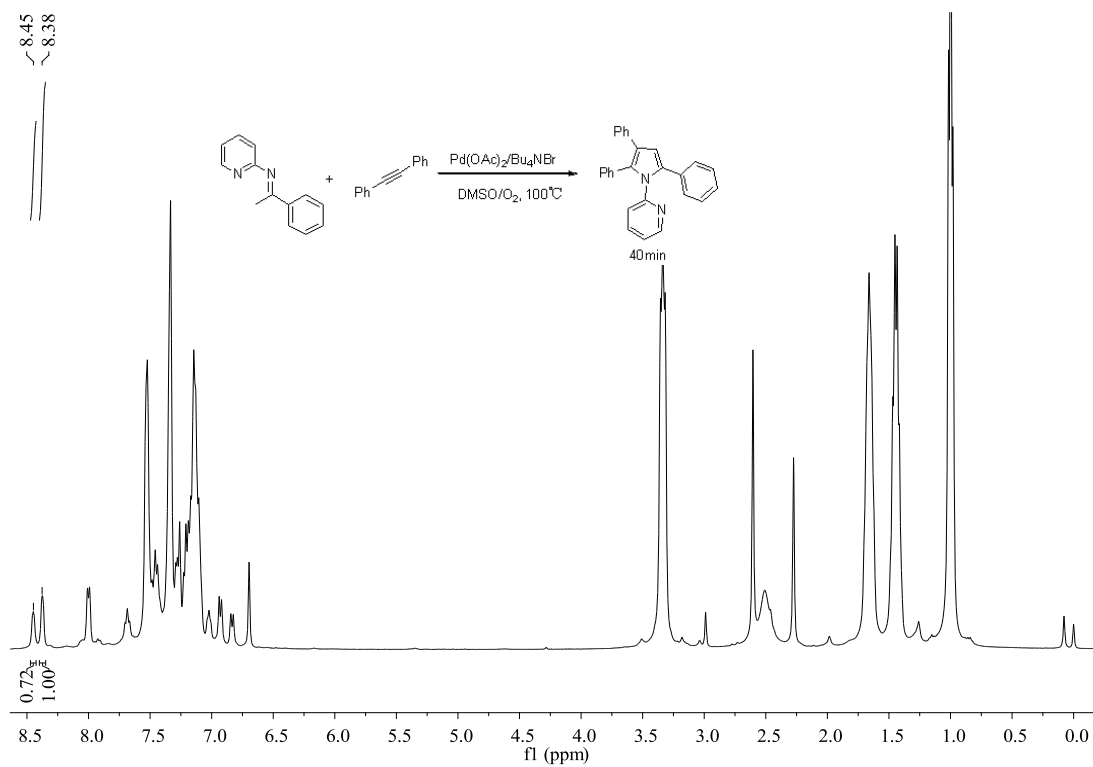

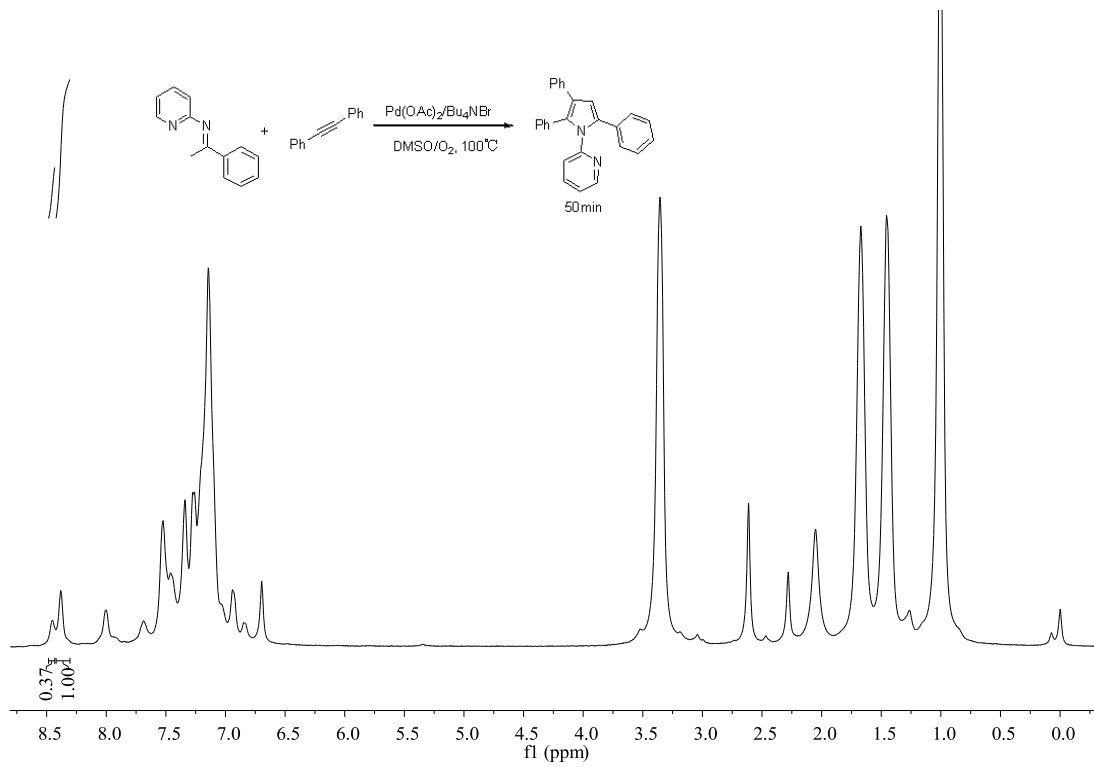

b. The crude  $^1\text{H}$  NMR spectrum for the reaction of *d*-**1a** with **2a**.

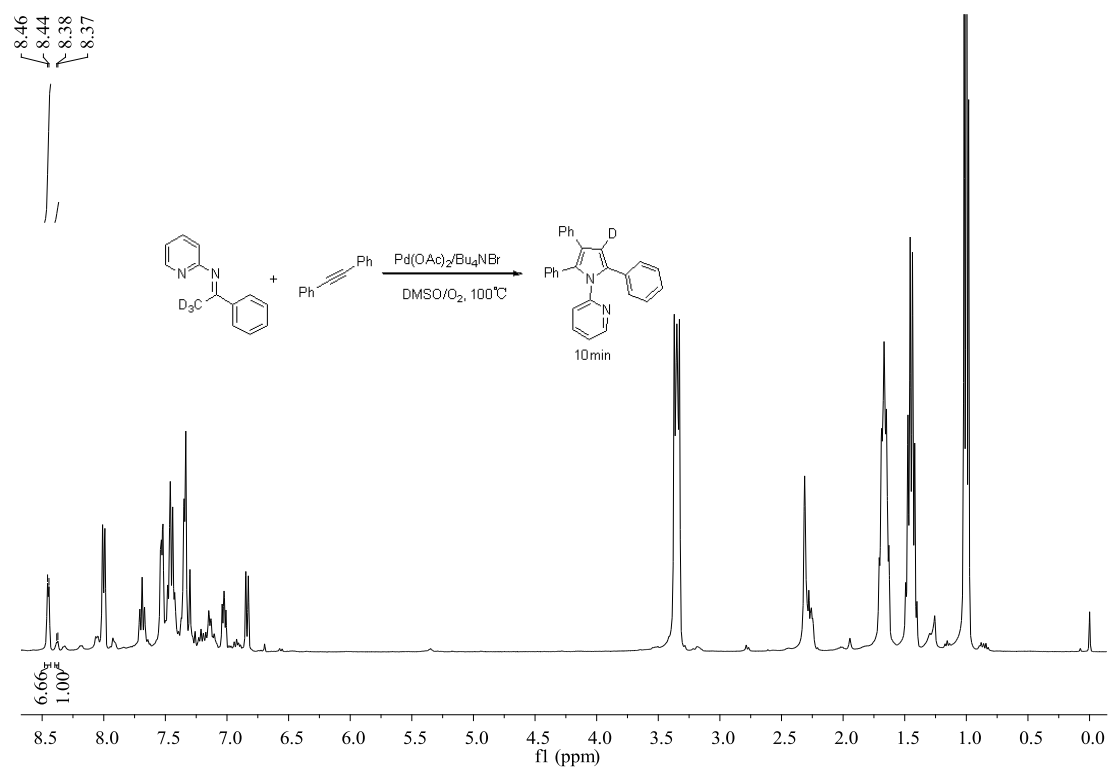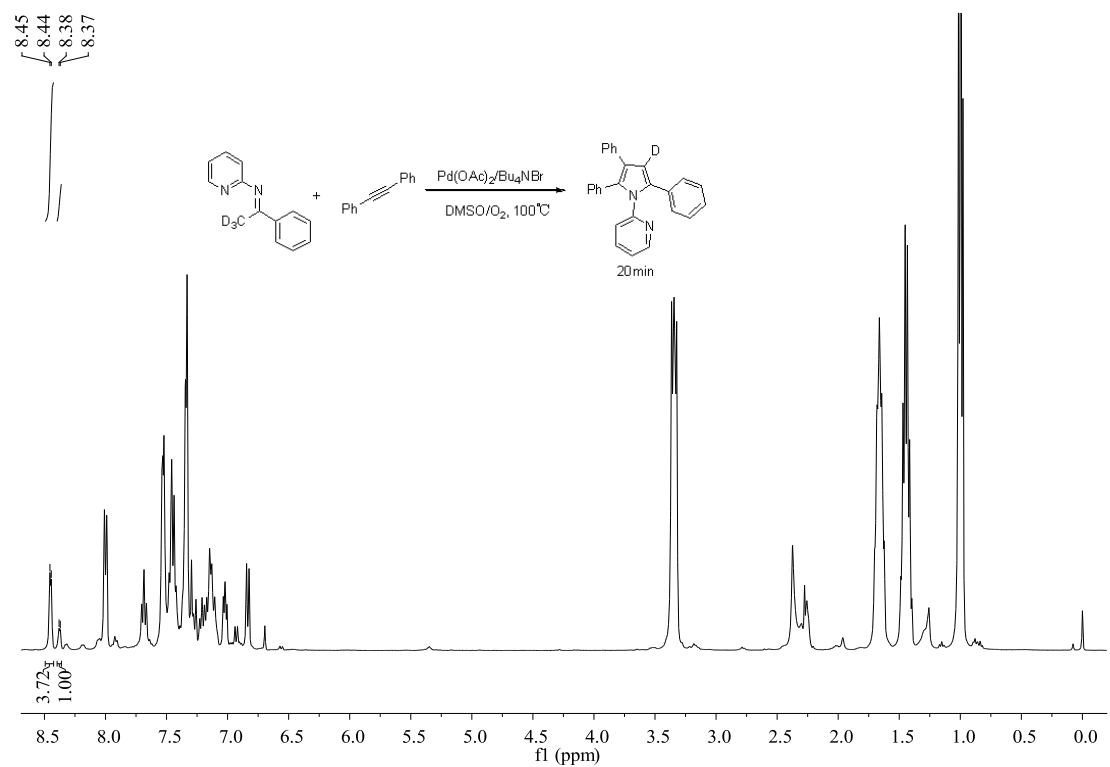

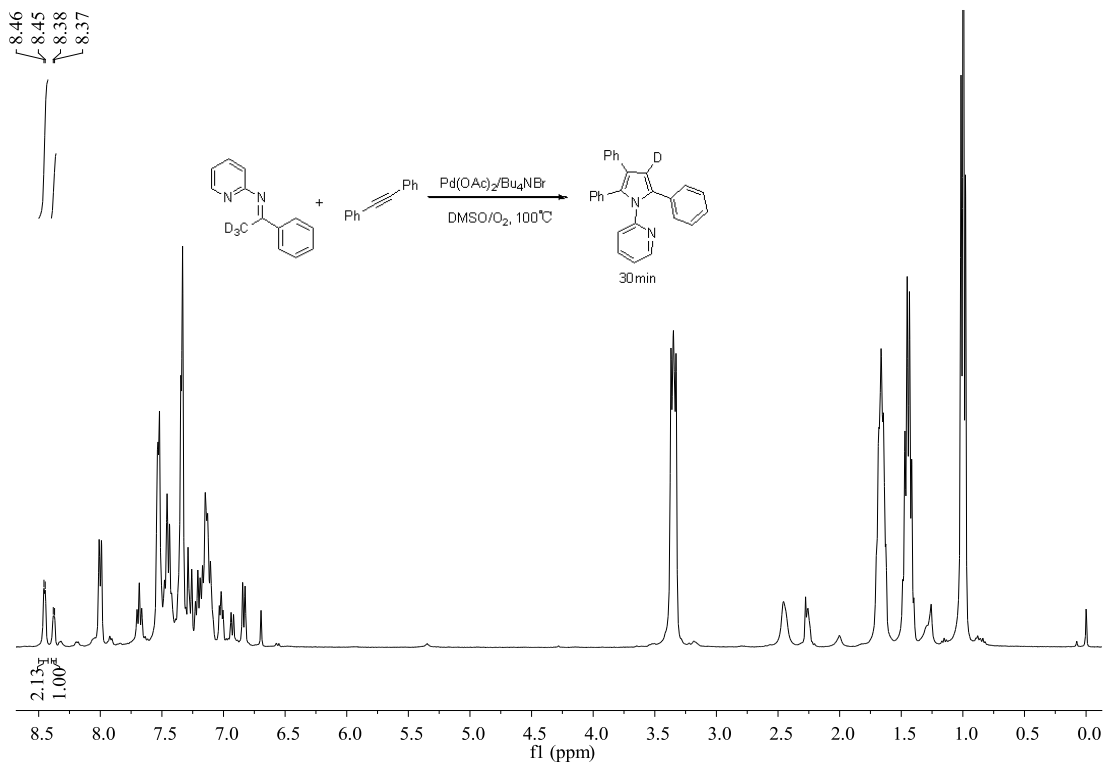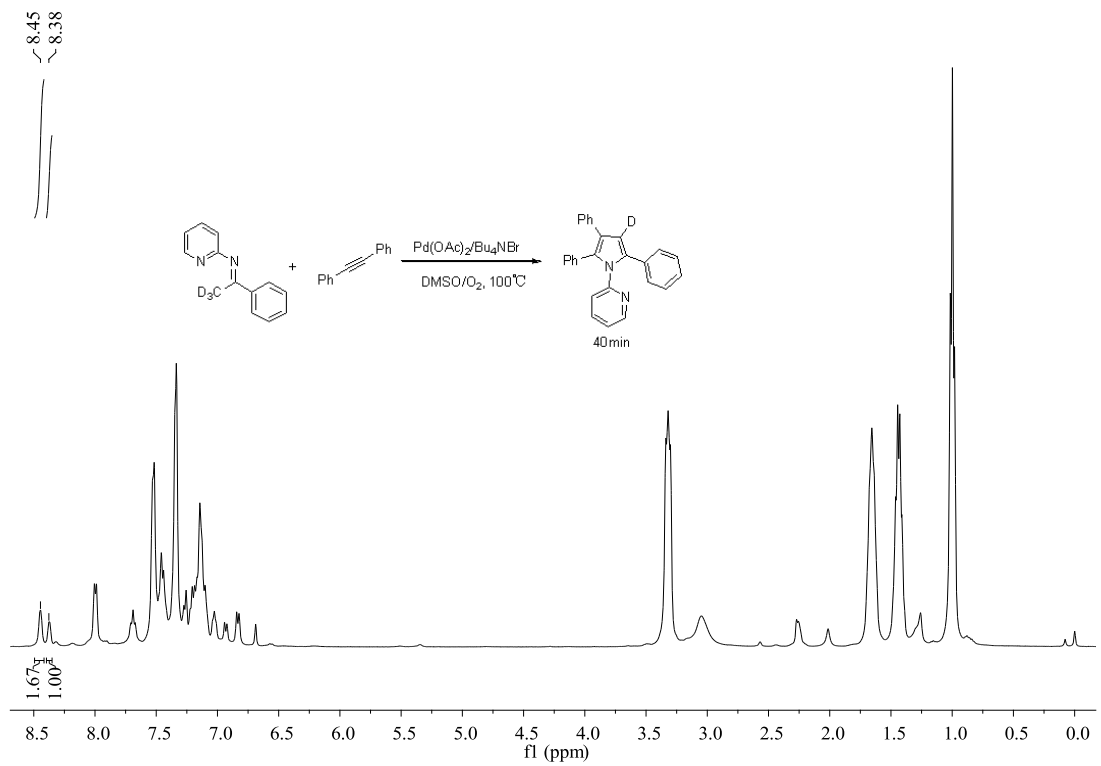



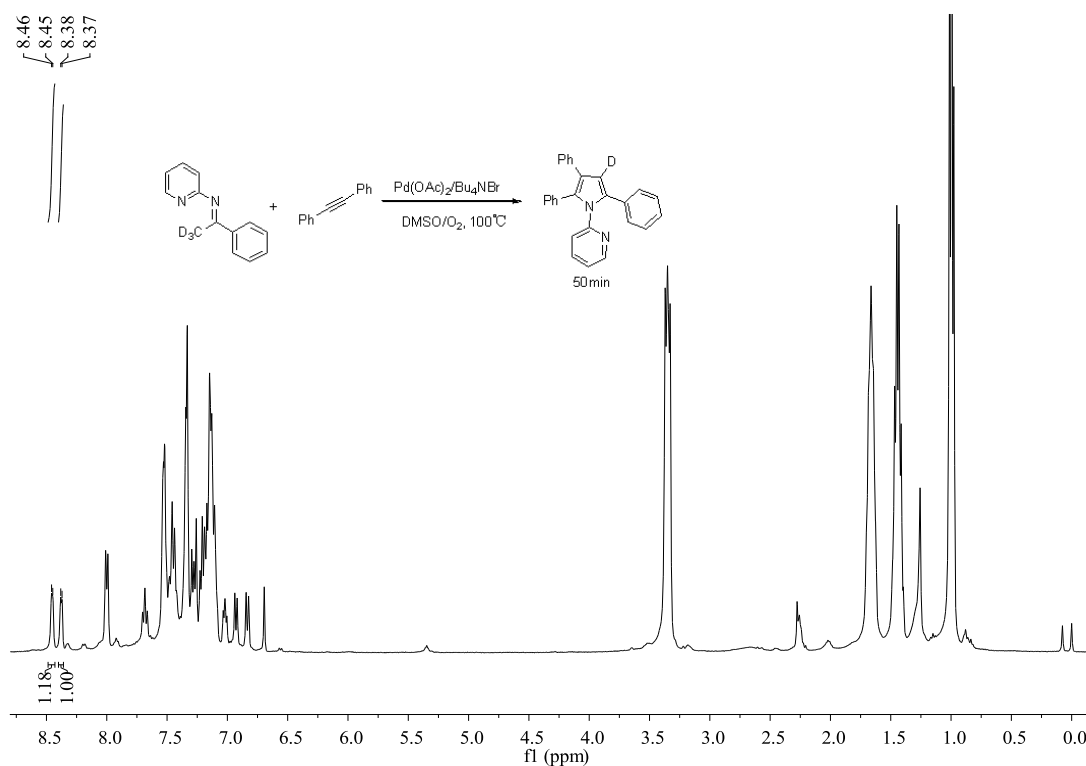

40) The crude  $^1\text{H}$  NMR spectrum for calculating **KIE** value via competition reactions (Using  $\text{CDCl}_3$  as solvent)

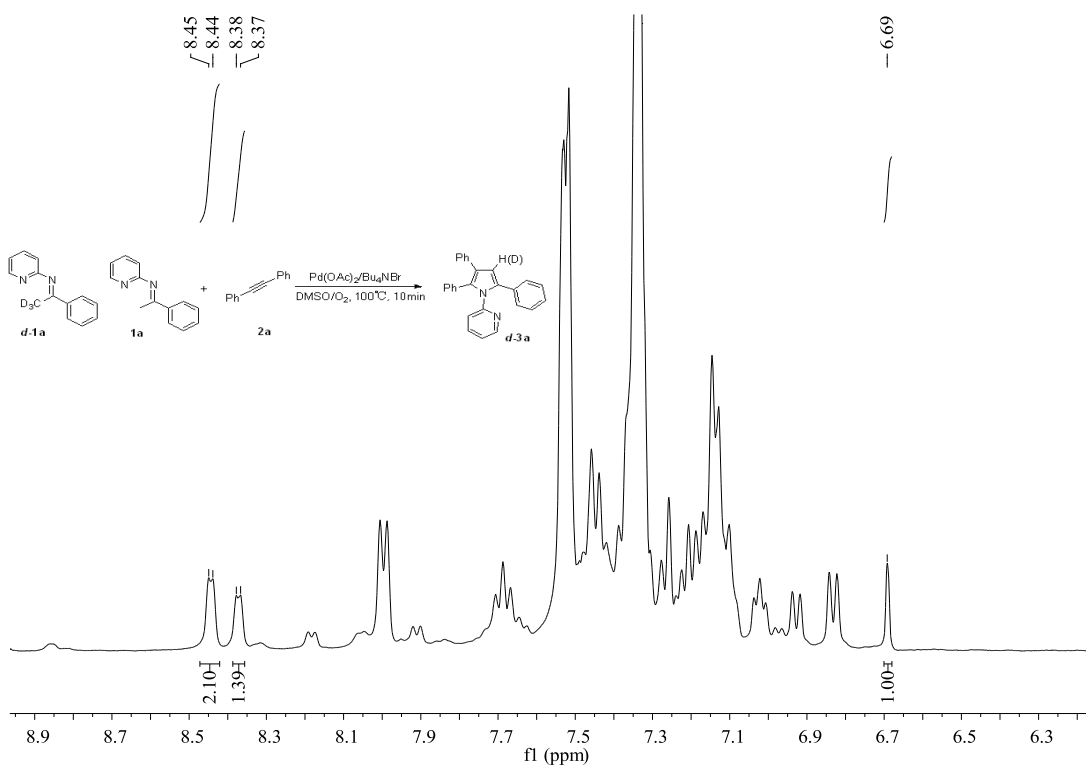

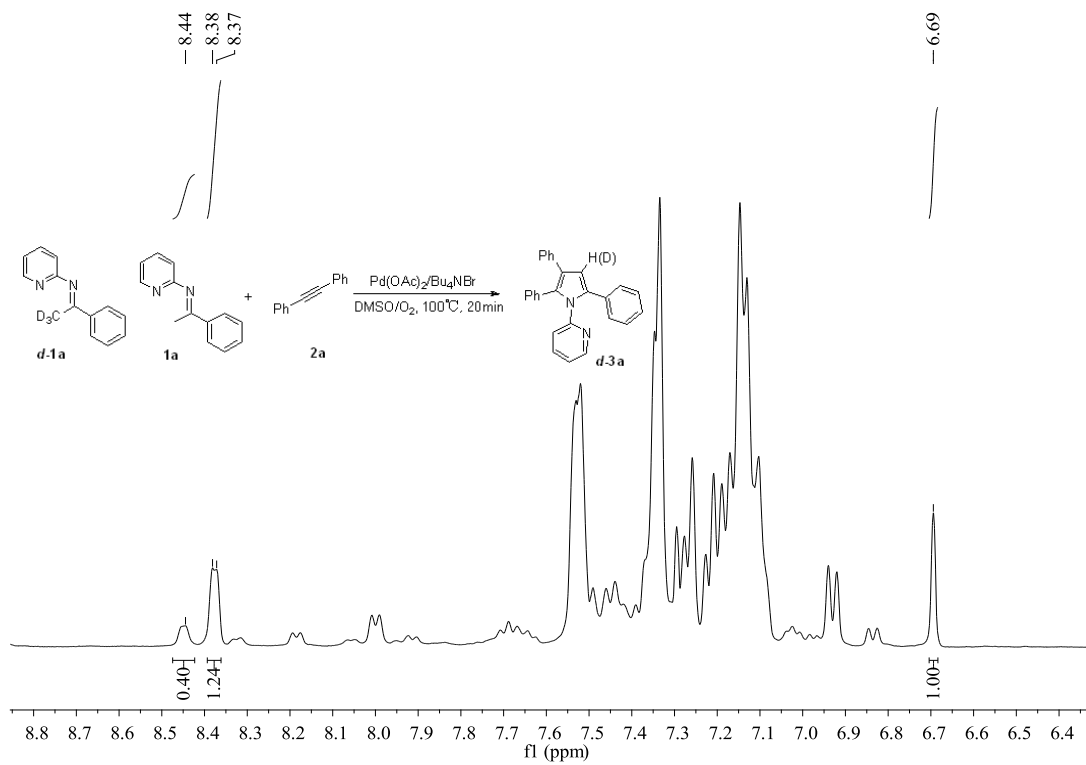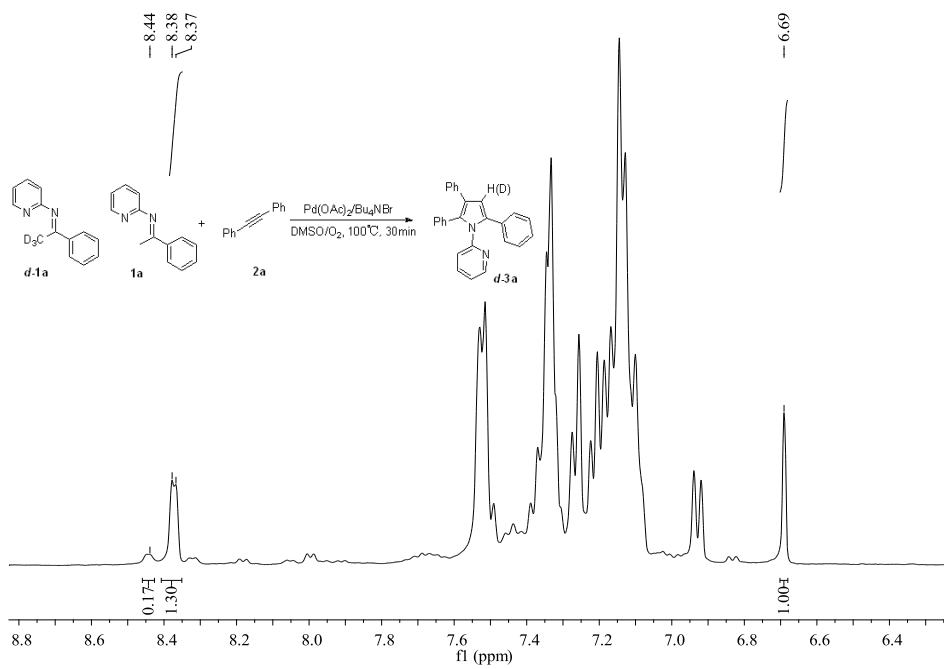

Supplement: c4cc04676e1.pdf [file c4cc04676e1.pdf]
